# Supplementary material for: The Trypanosoma brucei MitoCarta and its regulation and splicing pattern during development
Source: PubMed Central journal article supplement — Nucleic Acids Res. 2010 Jul 26;38(21):7378–87. doi: 10.1093/nar/gkq618 (PMC2995047; doi:10.1093/nar/gkq618), 2010-07-26
Supplement: supp_gkq618_Supplementary_tables.pdf [file supp_gkq618_Supplementary_tables.pdf]

Table S1. *T.brucei* Gene ID of 597 mitochondrial proteins used as positive samples.

| Index | Gene ID       | Index | Gene ID      | Index | Gene ID        |
|-------|---------------|-------|--------------|-------|----------------|
| 1     | Tb09.160.0760 | 200   | Tb11.03.0260 | 399   | Tb927.8.7530   |
| 2     | Tb09.160.1820 | 201   | Tb11.03.0475 | 400   | Tb927.8.8170   |
| 3     | Tb09.160.2250 | 202   | Tb11.03.0870 | 401   | Tb927.8.8180   |
| 4     | Tb09.160.2970 | 203   | Tb11.03.0950 | 402   | Tb04.24M18.150 |
| 5     | Tb09.160.3110 | 204   | Tb11.0400    | 403   | Tb09.160.0370  |
| 6     | Tb09.160.3800 | 205   | Tb11.46.0006 | 404   | Tb09.160.1020  |
| 7     | Tb09.160.4090 | 206   | Tb11.47.0004 | 405   | Tb09.160.2060  |
| 8     | Tb09.160.4130 | 207   | Tb11.47.0012 | 406   | Tb09.160.2160  |
| 9     | Tb09.160.4300 | 208   | Tb11.47.0017 | 407   | Tb09.160.2220  |
| 10    | Tb09.160.4310 | 209   | Tb11.47.0022 | 408   | Tb09.160.2380  |
| 11    | Tb09.160.4380 | 210   | Tb11.47.0024 | 409   | Tb09.160.4840  |
| 12    | Tb09.160.4750 | 211   | Tb11.55.0009 | 410   | Tb09.160.5050  |
| 13    | Tb09.160.5240 | 212   | Tb11.55.0016 | 411   | Tb09.160.5110  |
| 14    | Tb09.160.5260 | 213   | Tb11.55.0026 | 412   | Tb09.211.0760  |
| 15    | Tb09.160.5280 | 214   | Tb927.1.1160 | 413   | Tb09.211.0950  |
| 16    | Tb09.211.0230 | 215   | Tb927.1.1200 | 414   | Tb09.211.1240  |
| 17    | Tb09.211.0330 | 216   | Tb927.1.1580 | 415   | Tb09.211.1880  |
| 18    | Tb09.211.1380 | 217   | Tb927.1.1690 | 416   | Tb09.211.1940  |
| 19    | Tb09.211.1600 | 218   | Tb927.1.2990 | 417   | Tb09.211.2530  |
| 20    | Tb09.211.1750 | 219   | Tb927.1.3030 | 418   | Tb09.211.2600  |
| 21    | Tb09.211.1900 | 220   | Tb927.1.4100 | 419   | Tb09.211.3720  |
| 22    | Tb09.211.2370 | 221   | Tb927.1.4230 | 420   | Tb10.26.0100   |
| 23    | Tb09.211.2430 | 222   | Tb927.1.730  | 421   | Tb10.26.0390   |
| 24    | Tb09.211.2580 | 223   | Tb927.2.1860 | 422   | Tb10.26.1020   |
| 25    | Tb09.211.3000 | 224   | Tb927.2.2470 | 423   | Tb10.389.1910  |
| 26    | Tb09.211.3200 | 225   | Tb927.2.2940 | 424   | Tb10.406.0100  |
| 27    | Tb09.211.3800 | 226   | Tb927.2.2970 | 425   | Tb10.61.3070   |
| 28    | Tb09.211.4400 | 227   | Tb927.2.3030 | 426   | Tb10.6k15.0120 |
| 29    | Tb09.211.4510 | 228   | Tb927.2.3610 | 427   | Tb10.6k15.0160 |
| 30    | Tb09.211.4511 | 229   | Tb927.2.3800 | 428   | Tb10.6k15.0310 |
| 31    | Tb09.211.4580 | 230   | Tb927.2.4110 | 429   | Tb10.6k15.0480 |
| 32    | Tb09.211.4700 | 231   | Tb927.2.4380 | 430   | Tb10.6k15.0500 |
| 33    | Tb09.211.4740 | 232   | Tb927.2.4400 | 431   | Tb10.6k15.1120 |
| 34    | Tb09.244.2620 | 233   | Tb927.2.4590 | 432   | Tb10.6k15.1280 |
| 35    | Tb09.244.2670 | 234   | Tb927.2.4610 | 433   | Tb10.6k15.1430 |
| 36    | Tb09.244.2840 | 235   | Tb927.2.4890 | 434   | Tb10.6k15.1450 |
| 37    | Tb09.v1.0420  | 236   | Tb927.2.5930 | 435   | Tb10.6k15.1800 |
| 38    | Tb10.05.0050  | 237   | Tb927.2.6070 | 436   | Tb10.6k15.1910 |
| 39    | Tb10.05.0070  | 238   | Tb927.3.1000 | 437   | Tb10.6k15.1930 |

|    |                |     |              |     |                |
|----|----------------|-----|--------------|-----|----------------|
| 40 | Tb10.100.0070  | 239 | Tb927.3.1380 | 438 | Tb10.6k15.2640 |
| 41 | Tb10.100.0160  | 240 | Tb927.3.1410 | 439 | Tb10.70.0660   |
| 42 | Tb10.100.0220  | 241 | Tb927.3.1590 | 440 | Tb10.70.1120   |
| 43 | Tb10.26.0050   | 242 | Tb927.3.1690 | 441 | Tb10.70.1460   |
| 44 | Tb10.26.0600   | 243 | Tb927.3.1710 | 442 | Tb10.70.2350   |
| 45 | Tb10.26.0750   | 244 | Tb927.3.1790 | 443 | Tb10.70.2670   |
| 46 | Tb10.26.0860   | 245 | Tb927.3.1890 | 444 | Tb10.70.2970   |
| 47 | Tb10.26.1000   | 246 | Tb927.3.1940 | 445 | Tb10.70.3010   |
| 48 | Tb10.389.0130  | 247 | Tb927.3.2180 | 446 | Tb10.70.3190   |
| 49 | Tb10.389.0340  | 248 | Tb927.3.2230 | 447 | Tb10.70.3590   |
| 50 | Tb10.389.0690  | 249 | Tb927.3.2260 | 448 | Tb10.70.3820   |
| 51 | Tb10.389.0890  | 250 | Tb927.3.2880 | 449 | Tb10.70.4120   |
| 52 | Tb10.389.1140  | 251 | Tb927.3.2980 | 450 | Tb10.70.4980   |
| 53 | Tb10.389.1710  | 252 | Tb927.3.3660 | 451 | Tb10.70.5430   |
| 54 | Tb10.389.1785  | 253 | Tb927.3.5240 | 452 | Tb10.70.5880   |
| 55 | Tb10.389.1880  | 254 | Tb927.3.5610 | 453 | Tb10.70.5900   |
| 56 | Tb10.406.0050  | 255 | Tb927.3.5630 | 454 | Tb10.70.6260   |
| 57 | Tb10.406.0490  | 256 | Tb927.3.750  | 455 | Tb10.70.7440   |
| 58 | Tb10.406.0510  | 257 | Tb927.3.770  | 456 | Tb10.70.7450   |
| 59 | Tb10.61.0090   | 258 | Tb927.3.820  | 457 | Tb10.70.7900   |
| 60 | Tb10.61.0190   | 259 | Tb927.3.860  | 458 | Tb10.v4.0053   |
| 61 | Tb10.61.0610   | 260 | Tb927.3.970  | 459 | Tb11.01.0880   |
| 62 | Tb10.61.1530   | 261 | Tb927.4.1070 | 460 | Tb11.01.0890   |
| 63 | Tb10.61.1790   | 262 | Tb927.4.1500 | 461 | Tb11.01.1500   |
| 64 | Tb10.61.1820   | 263 | Tb927.4.1660 | 462 | Tb11.01.2490   |
| 65 | Tb10.61.2510   | 264 | Tb927.4.1810 | 463 | Tb11.01.2740   |
| 66 | Tb10.61.3110   | 265 | Tb927.4.2720 | 464 | Tb11.01.3190   |
| 67 | Tb10.6k15.0150 | 266 | Tb927.4.3300 | 465 | Tb11.01.3290   |
| 68 | Tb10.6k15.0490 | 267 | Tb927.4.3450 | 466 | Tb11.01.3490   |
| 69 | Tb10.6k15.0960 | 268 | Tb927.4.3690 | 467 | Tb11.01.3970   |
| 70 | Tb10.6k15.1300 | 269 | Tb927.4.4160 | 468 | Tb11.01.4740   |
| 71 | Tb10.6k15.1460 | 270 | Tb927.4.4300 | 469 | Tb11.01.5110   |
| 72 | Tb10.6k15.1600 | 271 | Tb927.4.440  | 470 | Tb11.01.5280   |
| 73 | Tb10.6k15.2180 | 272 | Tb927.4.4600 | 471 | Tb11.01.5460   |
| 74 | Tb10.6k15.2310 | 273 | Tb927.4.4610 | 472 | Tb11.01.6320   |
| 75 | Tb10.6k15.2510 | 274 | Tb927.4.4620 | 473 | Tb11.01.6710   |
| 76 | Tb10.6k15.3030 | 275 | Tb927.4.4910 | 474 | Tb11.01.7900   |
| 77 | Tb10.6k15.3040 | 276 | Tb927.4.720  | 475 | Tb11.01.8225   |
| 78 | Tb10.6k15.3080 | 277 | Tb927.5.1060 | 476 | Tb11.01.8230   |
| 79 | Tb10.6k15.3250 | 278 | Tb927.5.1510 | 477 | Tb11.01.8500   |
| 80 | Tb10.6k15.3290 | 279 | Tb927.5.1550 | 478 | Tb11.02.0180   |

|     |                |     |              |     |              |
|-----|----------------|-----|--------------|-----|--------------|
| 81  | Tb10.6k15.3640 | 280 | Tb927.5.1710 | 479 | Tb11.02.0430 |
| 82  | Tb10.6k15.3900 | 281 | Tb927.5.1790 | 480 | Tb11.02.1860 |
| 83  | Tb10.70.0430   | 282 | Tb927.5.2070 | 481 | Tb11.02.1880 |
| 84  | Tb10.70.0530   | 283 | Tb927.5.2580 | 482 | Tb11.02.2420 |
| 85  | Tb10.70.0625   | 284 | Tb927.5.2780 | 483 | Tb11.02.3310 |
| 86  | Tb10.70.1410   | 285 | Tb927.5.2930 | 484 | Tb11.02.3570 |
| 87  | Tb10.70.1520   | 286 | Tb927.5.3010 | 485 | Tb11.02.3720 |
| 88  | Tb10.70.1580   | 287 | Tb927.5.3040 | 486 | Tb11.02.4330 |
| 89  | Tb10.70.1640   | 288 | Tb927.5.3090 | 487 | Tb11.02.4500 |
| 90  | Tb10.70.1750   | 289 | Tb927.5.3110 | 488 | Tb11.02.4660 |
| 91  | Tb10.70.1890   | 290 | Tb927.5.3300 | 489 | Tb11.02.5100 |
| 92  | Tb10.70.2090   | 291 | Tb927.5.3350 | 490 | Tb11.02.5820 |
| 93  | Tb10.70.2155   | 292 | Tb927.5.3360 | 491 | Tb11.03.0510 |
| 94  | Tb10.70.2190   | 293 | Tb927.5.3410 | 492 | Tb11.03.0900 |
| 95  | Tb10.70.2290   | 294 | Tb927.5.3640 | 493 | Tb11.12.0014 |
| 96  | Tb10.70.2320   | 295 | Tb927.5.3870 | 494 | Tb11.46.0012 |
| 97  | Tb10.70.2630   | 296 | Tb927.5.3980 | 495 | Tb11.47.0009 |
| 98  | Tb10.70.3150   | 297 | Tb927.5.4040 | 496 | Tb11.47.0020 |
| 99  | Tb10.70.3280   | 298 | Tb927.5.4120 | 497 | Tb11.55.0010 |
| 100 | Tb10.70.3680   | 299 | Tb927.5.450  | 498 | Tb11.55.0017 |
| 101 | Tb10.70.3840   | 300 | Tb927.6.1250 | 499 | Tb927.1.1330 |
| 102 | Tb10.70.3850   | 301 | Tb927.6.1410 | 500 | Tb927.1.1610 |
| 103 | Tb10.70.4220   | 302 | Tb927.6.1440 | 501 | Tb927.1.1730 |
| 104 | Tb10.70.4280   | 303 | Tb927.6.1680 | 502 | Tb927.1.3010 |
| 105 | Tb10.70.4380   | 304 | Tb927.6.2010 | 503 | Tb927.1.3800 |
| 106 | Tb10.70.4500   | 305 | Tb927.6.2080 | 504 | Tb927.1.5000 |
| 107 | Tb10.70.4850   | 306 | Tb927.6.2180 | 505 | Tb927.1.740  |
| 108 | Tb10.70.5110   | 307 | Tb927.6.2420 | 506 | Tb927.1.790  |
| 109 | Tb10.70.5380   | 308 | Tb927.6.2790 | 507 | Tb927.1.840  |
| 110 | Tb10.70.5510   | 309 | Tb927.6.3600 | 508 | Tb927.2.2210 |
| 111 | Tb10.70.5970   | 310 | Tb927.6.3740 | 509 | Tb927.2.2510 |
| 112 | Tb10.70.6930   | 311 | Tb927.6.3930 | 510 | Tb927.2.3180 |
| 113 | Tb10.70.7550   | 312 | Tb927.6.4040 | 511 | Tb927.2.4700 |
| 114 | Tb10.70.7650   | 313 | Tb927.6.4080 | 512 | Tb927.2.4830 |
| 115 | Tb10.70.7760   | 314 | Tb927.6.4130 | 513 | Tb927.3.1720 |
| 116 | Tb10.70.7840   | 315 | Tb927.6.4200 | 514 | Tb927.3.1730 |
| 117 | Tb10.70.7960   | 316 | Tb927.6.4540 | 515 | Tb927.3.1820 |
| 118 | Tb11.01.0610   | 317 | Tb927.6.4560 | 516 | Tb927.3.2010 |
| 119 | Tb11.01.0640   | 318 | Tb927.6.4580 | 517 | Tb927.3.2080 |
| 120 | Tb11.01.1130   | 319 | Tb927.6.4930 | 518 | Tb927.3.2130 |
| 121 | Tb11.01.1160   | 320 | Tb927.6.4990 | 519 | Tb927.3.2300 |

|     |              |     |              |     |              |
|-----|--------------|-----|--------------|-----|--------------|
| 122 | Tb11.01.1440 | 321 | Tb927.6.590  | 520 | Tb927.3.2370 |
| 123 | Tb11.01.1600 | 322 | Tb927.7.1070 | 521 | Tb927.3.2670 |
| 124 | Tb11.01.1690 | 323 | Tb927.7.1340 | 522 | Tb927.3.3680 |
| 125 | Tb11.01.1740 | 324 | Tb927.7.1550 | 523 | Tb927.3.3890 |
| 126 | Tb11.01.1810 | 325 | Tb927.7.2570 | 524 | Tb927.3.4030 |
| 127 | Tb11.01.1840 | 326 | Tb927.7.2620 | 525 | Tb927.3.4210 |
| 128 | Tb11.01.1900 | 327 | Tb927.7.2760 | 526 | Tb927.3.4260 |
| 129 | Tb11.01.1910 | 328 | Tb927.7.2990 | 527 | Tb927.3.4420 |
| 130 | Tb11.01.1930 | 329 | Tb927.7.3050 | 528 | Tb927.3.4920 |
| 131 | Tb11.01.2000 | 330 | Tb927.7.3240 | 529 | Tb927.3.940  |
| 132 | Tb11.01.2170 | 331 | Tb927.7.3460 | 530 | Tb927.3.950  |
| 133 | Tb11.01.2340 | 332 | Tb927.7.3470 | 531 | Tb927.4.1130 |
| 134 | Tb11.01.3300 | 333 | Tb927.7.3510 | 532 | Tb927.4.1440 |
| 135 | Tb11.01.3500 | 334 | Tb927.7.3590 | 533 | Tb927.4.1540 |
| 136 | Tb11.01.3550 | 335 | Tb927.7.3910 | 534 | Tb927.4.1760 |
| 137 | Tb11.01.3710 | 336 | Tb927.7.3940 | 535 | Tb927.4.2360 |
| 138 | Tb11.01.3860 | 337 | Tb927.7.3950 | 536 | Tb927.4.2440 |
| 139 | Tb11.01.4702 | 338 | Tb927.7.3960 | 537 | Tb927.4.2580 |
| 140 | Tb11.01.4860 | 339 | Tb927.7.3990 | 538 | Tb927.4.330  |
| 141 | Tb11.01.4870 | 340 | Tb927.7.4140 | 539 | Tb927.4.3660 |
| 142 | Tb11.01.5040 | 341 | Tb927.7.4710 | 540 | Tb927.4.600  |
| 143 | Tb11.01.5180 | 342 | Tb927.7.5260 | 541 | Tb927.4.630  |
| 144 | Tb11.01.5390 | 343 | Tb927.7.6350 | 542 | Tb927.4.830  |
| 145 | Tb11.01.5480 | 344 | Tb927.7.6800 | 543 | Tb927.5.1130 |
| 146 | Tb11.01.5960 | 345 | Tb927.7.6990 | 544 | Tb927.5.2150 |
| 147 | Tb11.01.6620 | 346 | Tb927.7.7010 | 545 | Tb927.5.2810 |
| 148 | Tb11.01.6680 | 347 | Tb927.7.7080 | 546 | Tb927.5.3340 |
| 149 | Tb11.01.7090 | 348 | Tb927.7.7330 | 547 | Tb927.5.4080 |
| 150 | Tb11.01.7110 | 349 | Tb927.7.7410 | 548 | Tb927.5.510  |
| 151 | Tb11.01.7140 | 350 | Tb927.7.7420 | 549 | Tb927.5.530  |
| 152 | Tb11.01.7290 | 351 | Tb927.7.7440 | 550 | Tb927.5.740  |
| 153 | Tb11.01.7300 | 352 | Tb927.7.800  | 551 | Tb927.6.1200 |
| 154 | Tb11.01.7480 | 353 | Tb927.7.840  | 552 | Tb927.6.1590 |
| 155 | Tb11.01.7510 | 354 | Tb927.8.1060 | 553 | Tb927.6.1860 |
| 156 | Tb11.01.8090 | 355 | Tb927.8.1240 | 554 | Tb927.6.1890 |
| 157 | Tb11.01.8200 | 356 | Tb927.8.1420 | 555 | Tb927.6.2140 |
| 158 | Tb11.01.8470 | 357 | Tb927.8.1430 | 556 | Tb927.6.2230 |
| 159 | Tb11.01.8620 | 358 | Tb927.8.1490 | 557 | Tb927.6.2380 |
| 160 | Tb11.01.8630 | 359 | Tb927.8.1860 | 558 | Tb927.6.2490 |
| 161 | Tb11.02.0130 | 360 | Tb927.8.1880 | 559 | Tb927.6.2510 |
| 162 | Tb11.02.0250 | 361 | Tb927.8.1890 | 560 | Tb927.6.2630 |

|     |              |     |              |     |              |
|-----|--------------|-----|--------------|-----|--------------|
| 163 | Tb11.02.0290 | 362 | Tb927.8.1990 | 561 | Tb927.6.3360 |
| 164 | Tb11.02.0440 | 363 | Tb927.8.2530 | 562 | Tb927.6.4070 |
| 165 | Tb11.02.0490 | 364 | Tb927.8.2540 | 563 | Tb927.7.1080 |
| 166 | Tb11.02.0770 | 365 | Tb927.8.2740 | 564 | Tb927.7.2200 |
| 167 | Tb11.02.1110 | 366 | Tb927.8.2760 | 565 | Tb927.7.2390 |
| 168 | Tb11.02.1440 | 367 | Tb927.8.3110 | 566 | Tb927.7.2410 |
| 169 | Tb11.02.1480 | 368 | Tb927.8.3170 | 567 | Tb927.7.2690 |
| 170 | Tb11.02.2070 | 369 | Tb927.8.3300 | 568 | Tb927.7.3100 |
| 171 | Tb11.02.2250 | 370 | Tb927.8.3320 | 569 | Tb927.7.3520 |
| 172 | Tb11.02.2280 | 371 | Tb927.8.3330 | 570 | Tb927.7.3750 |
| 173 | Tb11.02.2300 | 372 | Tb927.8.3580 | 571 | Tb927.7.3770 |
| 174 | Tb11.02.2390 | 373 | Tb927.8.3690 | 572 | Tb927.7.3810 |
| 175 | Tb11.02.2460 | 374 | Tb927.8.3830 | 573 | Tb927.7.4440 |
| 176 | Tb11.02.2480 | 375 | Tb927.8.4040 | 574 | Tb927.7.5110 |
| 177 | Tb11.02.2700 | 376 | Tb927.8.4250 | 575 | Tb927.7.5280 |
| 178 | Tb11.02.2710 | 377 | Tb927.8.4440 | 576 | Tb927.7.5440 |
| 179 | Tb11.02.2740 | 378 | Tb927.8.4550 | 577 | Tb927.7.640  |
| 180 | Tb11.02.2960 | 379 | Tb927.8.4810 | 578 | Tb927.7.910  |
| 181 | Tb11.02.3130 | 380 | Tb927.8.4860 | 579 | Tb927.8.1740 |
| 182 | Tb11.02.3180 | 381 | Tb927.8.5120 | 580 | Tb927.8.1770 |
| 183 | Tb11.02.3530 | 382 | Tb927.8.5200 | 581 | Tb927.8.2470 |
| 184 | Tb11.02.3670 | 383 | Tb927.8.5280 | 582 | Tb927.8.2670 |
| 185 | Tb11.02.3800 | 384 | Tb927.8.5560 | 583 | Tb927.8.2880 |
| 186 | Tb11.02.3810 | 385 | Tb927.8.5640 | 584 | Tb927.8.3090 |
| 187 | Tb11.02.4120 | 386 | Tb927.8.5690 | 585 | Tb927.8.4000 |
| 188 | Tb11.02.4480 | 387 | Tb927.8.580  | 586 | Tb927.8.4240 |
| 189 | Tb11.02.4800 | 388 | Tb927.8.5860 | 587 | Tb927.8.4380 |
| 190 | Tb11.02.4810 | 389 | Tb927.8.6060 | 588 | Tb927.8.4930 |
| 191 | Tb11.02.4890 | 390 | Tb927.8.6080 | 589 | Tb927.8.5100 |
| 192 | Tb11.02.5160 | 391 | Tb927.8.620  | 590 | Tb927.8.5220 |
| 193 | Tb11.02.5280 | 392 | Tb927.8.630  | 591 | Tb927.8.5420 |
| 194 | Tb11.02.5390 | 393 | Tb927.8.6580 | 592 | Tb927.8.5660 |
| 195 | Tb11.02.5530 | 394 | Tb927.8.680  | 593 | Tb927.8.6110 |
| 196 | Tb11.02.5660 | 395 | Tb927.8.6960 | 594 | Tb927.8.6560 |
| 197 | Tb11.02.5670 | 396 | Tb927.8.6970 | 595 | Tb927.8.6640 |
| 198 | Tb11.02.5770 | 397 | Tb927.8.7170 | 596 | Tb927.8.6800 |
| 199 | Tb11.03.0180 | 398 | Tb927.8.7260 | 597 | Tb927.8.7040 |

Table S2. *T.brucei* Gene ID of 1290 non-mitochondrial proteins used as negative samples.

| Index | Gene ID       | Index | Gene ID      | Index | Gene ID       |
|-------|---------------|-------|--------------|-------|---------------|
| 1     | Tb09.142.0100 | 431   | Tb11.02.2830 | 861   | Tb927.8.7840  |
| 2     | Tb09.142.0230 | 432   | Tb11.02.2930 | 862   | Tb927.8.7900  |
| 3     | Tb09.142.0240 | 433   | Tb11.02.2940 | 863   | Tb927.8.7920  |
| 4     | Tb09.142.0450 | 434   | Tb11.02.3160 | 864   | Tb927.8.7930  |
| 5     | Tb09.160.0110 | 435   | Tb11.02.3200 | 865   | Tb927.8.7940  |
| 6     | Tb09.160.0160 | 436   | Tb11.02.3270 | 866   | Tb927.8.8020  |
| 7     | Tb09.160.0260 | 437   | Tb11.02.3390 | 867   | Tb927.8.8040  |
| 8     | Tb09.160.0280 | 438   | Tb11.02.3400 | 868   | Tb927.8.8090  |
| 9     | Tb09.160.0580 | 439   | Tb11.02.3595 | 869   | Tb927.8.8100  |
| 10    | Tb09.160.0700 | 440   | Tb11.02.3610 | 870   | Tb927.8.8220  |
| 11    | Tb09.160.0710 | 441   | Tb11.02.3740 | 871   | Tb927.8.8230  |
| 12    | Tb09.160.0815 | 442   | Tb11.02.3920 | 872   | Tb927.8.8240  |
| 13    | Tb09.160.2010 | 443   | Tb11.02.3990 | 873   | Tb927.8.8250  |
| 14    | Tb09.160.2050 | 444   | Tb11.02.4040 | 874   | Tb927.8.8260  |
| 15    | Tb09.160.2150 | 445   | Tb11.02.4050 | 875   | Tb927.8.8300  |
| 16    | Tb09.160.2420 | 446   | Tb11.02.4070 | 876   | Tb927.8.8330  |
| 17    | Tb09.160.2540 | 447   | Tb11.02.4100 | 877   | Tb927.8.900   |
| 18    | Tb09.160.2600 | 448   | Tb11.02.4140 | 878   | Tb927.8.920   |
| 19    | Tb09.160.2990 | 449   | Tb11.02.4200 | 879   | Tb927.8.980   |
| 20    | Tb09.160.3150 | 450   | Tb11.02.4220 | 880   | Tb927.7.2640  |
| 21    | Tb09.160.3210 | 451   | Tb11.02.4350 | 881   | Tb10.61.2870  |
| 22    | Tb09.160.3410 | 452   | Tb11.02.4360 | 882   | Tb927.3.4680  |
| 23    | Tb09.160.3470 | 453   | Tb11.02.4470 | 883   | Tb927.8.1710  |
| 24    | Tb09.160.3520 | 454   | Tb11.02.4520 | 884   | Tb927.6.160   |
| 25    | Tb09.160.3630 | 455   | Tb11.02.4570 | 885   | Tb11.01.2570  |
| 26    | Tb09.160.3670 | 456   | Tb11.02.4580 | 886   | Tb927.6.2270  |
| 27    | Tb09.160.3690 | 457   | Tb11.02.4640 | 887   | Tb927.3.4090  |
| 28    | Tb09.160.3820 | 458   | Tb11.02.5060 | 888   | Tb09.211.0900 |
| 29    | Tb09.160.4220 | 459   | Tb11.02.5110 | 889   | Tb10.61.2745  |
| 30    | Tb09.160.4430 | 460   | Tb11.02.5180 | 890   | Tb10.70.7230  |
| 31    | Tb09.160.4680 | 461   | Tb11.02.5210 | 891   | Tb927.6.4320  |
| 32    | Tb09.160.5020 | 462   | Tb11.02.5250 | 892   | Tb927.1.3070  |
| 33    | Tb09.160.5030 | 463   | Tb11.02.5270 | 893   | Tb09.160.0770 |
| 34    | Tb09.160.5160 | 464   | Tb11.02.5310 | 894   | Tb927.1.1710  |
| 35    | Tb09.160.5380 | 465   | Tb11.02.5320 | 895   | Tb11.01.4390  |
| 36    | Tb09.160.5390 | 466   | Tb11.02.5410 | 896   | Tb927.6.1290  |
| 37    | Tb09.160.5400 | 467   | Tb11.02.5470 | 897   | Tb11.03.0530  |
| 38    | Tb09.160.5550 | 468   | Tb11.02.5610 | 898   | Tb927.7.7130  |
| 39    | Tb09.160.5580 | 469   | Tb11.02.5620 | 899   | Tb927.6.4500  |

|    |               |     |              |     |                |
|----|---------------|-----|--------------|-----|----------------|
| 40 | Tb09.160.5590 | 470 | Tb11.02.5640 | 900 | Tb11.01.6200   |
| 41 | Tb09.211.0050 | 471 | Tb11.02.5790 | 901 | Tb10.70.5870   |
| 42 | Tb09.211.0110 | 472 | Tb11.02.5810 | 902 | Tb927.8.820    |
| 43 | Tb09.211.0120 | 473 | Tb11.03.0050 | 903 | Tb927.7.4500   |
| 44 | Tb09.211.0130 | 474 | Tb11.03.0140 | 904 | Tb10.389.1040  |
| 45 | Tb09.211.0210 | 475 | Tb11.03.0170 | 905 | Tb927.6.630    |
| 46 | Tb09.211.0430 | 476 | Tb11.03.0290 | 906 | Tb927.7.4460   |
| 47 | Tb09.211.0790 | 477 | Tb11.03.0410 | 907 | Tb11.01.2390   |
| 48 | Tb09.211.0860 | 478 | Tb11.03.0500 | 908 | Tb927.8.1840   |
| 49 | Tb09.211.0865 | 479 | Tb11.03.0670 | 909 | Tb927.3.1110   |
| 50 | Tb09.211.1000 | 480 | Tb11.03.0815 | 910 | Tb927.8.4080   |
| 51 | Tb09.211.1010 | 481 | Tb11.03.0890 | 911 | Tb927.3.5430   |
| 52 | Tb09.211.1020 | 482 | Tb11.03.0935 | 912 | Tb927.4.4700   |
| 53 | Tb09.211.1030 | 483 | Tb11.03.0970 | 913 | Tb10.61.1340   |
| 54 | Tb09.211.1190 | 484 | Tb11.09.0003 | 914 | Tb09.211.2960  |
| 55 | Tb09.211.1210 | 485 | Tb11.12.0006 | 915 | Tb09.211.0890  |
| 56 | Tb09.211.1510 | 486 | Tb11.12.0013 | 916 | Tb927.5.1250   |
| 57 | Tb09.211.1530 | 487 | Tb11.12.0016 | 917 | Tb10.70.1080   |
| 58 | Tb09.211.1695 | 488 | Tb11.14.0007 | 918 | Tb10.70.0980   |
| 59 | Tb09.211.1760 | 489 | Tb11.14.0008 | 919 | Tb11.01.6600   |
| 60 | Tb09.211.1820 | 490 | Tb11.14.0015 | 920 | Tb927.7.6640   |
| 61 | Tb09.211.2310 | 491 | Tb11.14.0019 | 921 | Tb927.1.3250   |
| 62 | Tb09.211.2590 | 492 | Tb11.17.0002 | 922 | Tb927.7.2120   |
| 63 | Tb09.211.2650 | 493 | Tb11.18.0004 | 923 | Tb10.406.0550  |
| 64 | Tb09.211.2730 | 494 | Tb11.18.0013 | 924 | Tb927.6.400    |
| 65 | Tb09.211.2900 | 495 | Tb11.18.0017 | 925 | Tb927.4.5340   |
| 66 | Tb09.211.2920 | 496 | Tb11.22.0012 | 926 | Tb927.8.910    |
| 67 | Tb09.211.3040 | 497 | Tb11.24.0007 | 927 | Tb10.70.3570   |
| 68 | Tb09.211.3270 | 498 | Tb11.24.0012 | 928 | Tb927.7.2680   |
| 69 | Tb09.211.3280 | 499 | Tb11.27.0001 | 929 | Tb10.70.5170   |
| 70 | Tb09.211.3620 | 500 | Tb11.39.0006 | 930 | Tb927.4.3810   |
| 71 | Tb09.211.3650 | 501 | Tb11.46.0001 | 931 | Tb927.4.3590   |
| 72 | Tb09.211.3770 | 502 | Tb11.46.0002 | 932 | Tb09.160.1100  |
| 73 | Tb09.211.3870 | 503 | Tb11.47.0001 | 933 | Tb927.3.4160   |
| 74 | Tb09.211.3920 | 504 | Tb11.50.0005 | 934 | Tb927.3.5010   |
| 75 | Tb09.211.4240 | 505 | Tb11.50.0006 | 935 | Tb927.4.3510   |
| 76 | Tb09.211.4350 | 506 | Tb11.51.0005 | 936 | Tb927.2.5970   |
| 77 | Tb09.211.4550 | 507 | Tb11.55.0020 | 937 | Tb927.7.6610   |
| 78 | Tb09.211.4760 | 508 | Tb11.55.0027 | 938 | Tb11.02.1000   |
| 79 | Tb09.211.4840 | 509 | Tb11.57.0004 | 939 | Tb10.70.1130   |
| 80 | Tb09.211.4850 | 510 | Tb11.57.0008 | 940 | Tb10.6k15.1820 |

|     |               |     |              |     |                |
|-----|---------------|-----|--------------|-----|----------------|
| 81  | Tb09.211.4870 | 511 | Tb11.57.0019 | 941 | Tb927.7.2780   |
| 82  | Tb09.244.0050 | 512 | Tb11.57.0024 | 942 | Tb09.244.2800  |
| 83  | Tb09.244.0200 | 513 | Tb11.57.0035 | 943 | Tb11.02.2040   |
| 84  | Tb09.244.0250 | 514 | Tb11.57.0052 | 944 | Tb927.3.2680   |
| 85  | Tb09.244.0470 | 515 | Tb11.57.0084 | 945 | Tb927.5.2620   |
| 86  | Tb09.244.0910 | 516 | Tb927.1.05   | 946 | Tb927.8.5830   |
| 87  | Tb09.244.1000 | 517 | Tb927.1.120  | 947 | Tb11.01.1350   |
| 88  | Tb09.244.1570 | 518 | Tb927.1.1240 | 948 | Tb11.02.0460   |
| 89  | Tb09.244.1580 | 519 | Tb927.1.1270 | 949 | Tb927.5.3450   |
| 90  | Tb09.244.1600 | 520 | Tb927.1.1370 | 950 | Tb927.4.2030   |
| 91  | Tb09.244.1740 | 521 | Tb927.1.1380 | 951 | Tb927.2.3990   |
| 92  | Tb09.244.1830 | 522 | Tb927.1.180  | 952 | Tb10.6k15.2450 |
| 93  | Tb09.244.2060 | 523 | Tb927.1.2100 | 953 | Tb927.7.3370   |
| 94  | Tb09.244.2120 | 524 | Tb927.1.2120 | 954 | Tb927.5.1280   |
| 95  | Tb09.244.2200 | 525 | Tb927.1.2150 | 955 | Tb11.02.1320   |
| 96  | Tb09.244.2280 | 526 | Tb927.1.2160 | 956 | Tb927.4.4350   |
| 97  | Tb09.244.2310 | 527 | Tb927.1.2260 | 957 | Tb09.160.0350  |
| 98  | Tb09.244.2330 | 528 | Tb927.1.2430 | 958 | Tb927.5.1300   |
| 99  | Tb09.244.2380 | 529 | Tb927.1.2450 | 959 | Tb927.8.1960   |
| 100 | Tb09.244.2400 | 530 | Tb927.1.2470 | 960 | Tb11.03.0700   |
| 101 | Tb09.244.2410 | 531 | Tb927.1.2490 | 961 | Tb11.02.1500   |
| 102 | Tb09.244.2420 | 532 | Tb927.1.2510 | 962 | Tb927.7.2400   |
| 103 | Tb09.244.2440 | 533 | Tb927.1.2550 | 963 | Tb927.7.4680   |
| 104 | Tb09.244.2450 | 534 | Tb927.1.2600 | 964 | Tb09.160.0460  |
| 105 | Tb09.244.2460 | 535 | Tb927.1.2820 | 965 | Tb11.01.7070   |
| 106 | Tb09.244.2470 | 536 | Tb927.1.2850 | 966 | Tb11.01.3850   |
| 107 | Tb09.244.2480 | 537 | Tb927.1.2880 | 967 | Tb927.3.1740   |
| 108 | Tb09.244.2500 | 538 | Tb927.1.290  | 968 | Tb11.02.1810   |
| 109 | Tb09.244.2510 | 539 | Tb927.1.3110 | 969 | Tb927.3.4880   |
| 110 | Tb09.244.2520 | 540 | Tb927.1.3120 | 970 | Tb927.3.1680   |
| 111 | Tb09.244.2530 | 541 | Tb927.1.3180 | 971 | Tb11.01.2310   |
| 112 | Tb09.244.2540 | 542 | Tb927.1.3200 | 972 | Tb927.7.6980   |
| 113 | Tb09.244.2725 | 543 | Tb927.1.3220 | 973 | Tb927.8.4270   |
| 114 | Tb09.244.2730 | 544 | Tb927.1.3280 | 974 | Tb927.7.6260   |
| 115 | Tb09.244.2740 | 545 | Tb927.1.3320 | 975 | Tb927.8.2030   |
| 116 | Tb09.244.2790 | 546 | Tb927.1.3820 | 976 | Tb927.6.4020   |
| 117 | Tb09.354.0060 | 547 | Tb927.1.420  | 977 | Tb927.5.3030   |
| 118 | Tb09.354.0090 | 548 | Tb927.1.480  | 978 | Tb927.7.3860   |
| 119 | Tb09.354.0180 | 549 | Tb927.1.4870 | 979 | Tb11.01.1250   |
| 120 | Tb09.v1.0310  | 550 | Tb927.1.4900 | 980 | Tb927.4.3350   |
| 121 | Tb09.v1.0320  | 551 | Tb927.1.5030 | 981 | Tb11.02.1260   |



|     |               |     |              |      |               |
|-----|---------------|-----|--------------|------|---------------|
| 122 | Tb09.v1.0350  | 552 | Tb927.1.5080 | 982  | Tb10.389.1320 |
| 123 | Tb09.v1.0640  | 553 | Tb927.1.5110 | 983  | Tb927.6.3650  |
| 124 | Tb10.05.0010  | 554 | Tb927.1.5120 | 984  | Tb927.4.2000  |
| 125 | Tb10.05.0020  | 555 | Tb927.1.5170 | 985  | Tb927.7.3760  |
| 126 | Tb10.05.0120  | 556 | Tb927.1.5200 | 986  | Tb10.70.3670  |
| 127 | Tb10.05.0220  | 557 | Tb927.1.5220 | 987  | Tb09.211.3140 |
| 128 | Tb10.100.0080 | 558 | Tb927.1.5240 | 988  | Tb11.02.4230  |
| 129 | Tb10.100.0100 | 559 | Tb927.1.5300 | 989  | Tb927.8.540   |
| 130 | Tb10.100.0155 | 560 | Tb927.1.5330 | 990  | Tb927.3.2490  |
| 131 | Tb10.20.0130  | 561 | Tb927.1.540  | 991  | Tb927.3.4750  |
| 132 | Tb10.26.0070  | 562 | Tb927.1.630  | 992  | Tb927.6.4440  |
| 133 | Tb10.26.0200  | 563 | Tb927.1.700  | 993  | Tb10.70.7350  |
| 134 | Tb10.26.0320  | 564 | Tb927.1.870  | 994  | Tb927.4.4040  |
| 135 | Tb10.26.0370  | 565 | Tb927.2.1080 | 995  | Tb927.1.750   |
| 136 | Tb10.26.0510  | 566 | Tb927.2.1170 | 996  | Tb11.01.7750  |
| 137 | Tb10.26.0590  | 567 | Tb927.2.1180 | 997  | Tb11.02.0210  |
| 138 | Tb10.389.0060 | 568 | Tb927.2.1380 | 998  | Tb11.02.2670  |
| 139 | Tb10.389.0110 | 569 | Tb927.2.170  | 999  | Tb927.6.3000  |
| 140 | Tb10.389.0120 | 570 | Tb927.2.1780 | 1000 | Tb927.8.3710  |
| 141 | Tb10.389.0270 | 571 | Tb927.2.1890 | 1001 | Tb927.5.1340  |
| 142 | Tb10.389.0330 | 572 | Tb927.2.1920 | 1002 | Tb10.70.5050  |
| 143 | Tb10.389.0350 | 573 | Tb927.2.2020 | 1003 | Tb10.05.0170  |
| 144 | Tb10.389.0470 | 574 | Tb927.2.2060 | 1004 | Tb927.3.3130  |
| 145 | Tb10.389.0480 | 575 | Tb927.2.2180 | 1005 | Tb927.4.1680  |
| 146 | Tb10.389.0710 | 576 | Tb927.2.2190 | 1006 | Tb10.70.1570  |
| 147 | Tb10.389.0730 | 577 | Tb927.2.2240 | 1007 | Tb927.5.840   |
| 148 | Tb10.389.1330 | 578 | Tb927.2.240  | 1008 | Tb927.5.1700  |
| 149 | Tb10.389.1450 | 579 | Tb927.2.2440 | 1009 | Tb927.8.2770  |
| 150 | Tb10.389.1530 | 580 | Tb927.2.2460 | 1010 | Tb927.6.4520  |
| 151 | Tb10.389.1550 | 581 | Tb927.2.2670 | 1011 | Tb10.61.2430  |
| 152 | Tb10.389.1570 | 582 | Tb927.2.280  | 1012 | Tb09.211.4780 |
| 153 | Tb10.406.0240 | 583 | Tb927.2.2900 | 1013 | Tb927.4.4760  |
| 154 | Tb10.406.0260 | 584 | Tb927.2.3080 | 1014 | Tb927.6.3220  |
| 155 | Tb10.406.0320 | 585 | Tb927.2.3370 | 1015 | Tb11.02.0230  |
| 156 | Tb10.406.0330 | 586 | Tb927.2.340  | 1016 | Tb927.6.2340  |
| 157 | Tb10.406.0340 | 587 | Tb927.2.3440 | 1017 | Tb09.211.4200 |
| 158 | Tb10.406.0360 | 588 | Tb927.2.3460 | 1018 | Tb10.70.1770  |
| 159 | Tb10.406.0370 | 589 | Tb927.2.3580 | 1019 | Tb11.24.0011  |
| 160 | Tb10.406.0380 | 590 | Tb927.2.370  | 1020 | Tb927.4.360   |
| 161 | Tb10.406.0390 | 591 | Tb927.2.3720 | 1021 | Tb927.6.4850  |
| 162 | Tb10.406.0400 | 592 | Tb927.2.380  | 1022 | Tb10.100.0210 |

|     |                |     |              |      |               |
|-----|----------------|-----|--------------|------|---------------|
| 163 | Tb10.406.0410  | 593 | Tb927.2.3930 | 1023 | Tb10.389.0830 |
| 164 | Tb10.406.0420  | 594 | Tb927.2.4020 | 1024 | Tb927.6.5080  |
| 165 | Tb10.406.0430  | 595 | Tb927.2.4060 | 1025 | Tb11.01.4620  |
| 166 | Tb10.406.0440  | 596 | Tb927.2.4280 | 1026 | Tb927.7.5910  |
| 167 | Tb10.406.0450  | 597 | Tb927.2.4370 | 1027 | Tb09.211.3400 |
| 168 | Tb10.406.0460  | 598 | Tb927.2.4390 | 1028 | Tb927.7.5990  |
| 169 | Tb10.406.0500  | 599 | Tb927.2.470  | 1029 | Tb11.01.2330  |
| 170 | Tb10.406.0615  | 600 | Tb927.2.4870 | 1030 | Tb10.70.2750  |
| 171 | Tb10.61.0060   | 601 | Tb927.2.4930 | 1031 | Tb927.8.3410  |
| 172 | Tb10.61.0210   | 602 | Tb927.2.5060 | 1032 | Tb927.7.930   |
| 173 | Tb10.61.0420   | 603 | Tb927.2.510  | 1033 | Tb927.5.2130  |
| 174 | Tb10.61.0600   | 604 | Tb927.2.5250 | 1034 | Tb927.7.5580  |
| 175 | Tb10.61.0740   | 605 | Tb927.2.560  | 1035 | Tb927.4.2410  |
| 176 | Tb10.61.0770   | 606 | Tb927.2.5750 | 1036 | Tb927.2.5810  |
| 177 | Tb10.61.0890   | 607 | Tb927.2.5850 | 1037 | Tb927.6.5130  |
| 178 | Tb10.61.1030   | 608 | Tb927.2.5910 | 1038 | Tb927.7.4820  |
| 179 | Tb10.61.1040   | 609 | Tb927.2.6000 | 1039 | Tb11.01.0510  |
| 180 | Tb10.61.1090   | 610 | Tb927.2.6090 | 1040 | Tb11.01.7010  |
| 181 | Tb10.61.1330   | 611 | Tb927.2.6150 | 1041 | Tb927.2.5130  |
| 182 | Tb10.61.1360   | 612 | Tb927.2.6200 | 1042 | Tb927.7.5660  |
| 183 | Tb10.61.1380   | 613 | Tb927.2.6220 | 1043 | Tb09.160.0430 |
| 184 | Tb10.61.1390   | 614 | Tb927.2.6240 | 1044 | Tb927.7.3330  |
| 185 | Tb10.61.1590   | 615 | Tb927.2.6280 | 1045 | Tb927.7.2240  |
| 186 | Tb10.61.1630   | 616 | Tb927.2.6320 | 1046 | Tb927.7.3310  |
| 187 | Tb10.61.1920   | 617 | Tb927.2.6410 | 1047 | Tb927.8.7090  |
| 188 | Tb10.61.1950   | 618 | Tb927.2.690  | 1048 | Tb927.7.6910  |
| 189 | Tb10.61.1980   | 619 | Tb927.3.150  | 1049 | Tb927.7.2190  |
| 190 | Tb10.61.2040   | 620 | Tb927.3.1500 | 1050 | Tb927.5.1880  |
| 191 | Tb10.61.2090   | 621 | Tb927.3.1510 | 1051 | Tb927.4.3790  |
| 192 | Tb10.61.2180   | 622 | Tb927.3.1780 | 1052 | Tb927.6.2220  |
| 193 | Tb10.61.2530   | 623 | Tb927.3.180  | 1053 | Tb11.01.4850  |
| 194 | Tb10.61.2610   | 624 | Tb927.3.190  | 1054 | Tb927.5.890   |
| 195 | Tb10.61.2640   | 625 | Tb927.3.210  | 1055 | Tb11.01.0320  |
| 196 | Tb10.61.2650   | 626 | Tb927.3.2190 | 1056 | Tb09.211.0180 |
| 197 | Tb10.61.2750   | 627 | Tb927.3.2340 | 1057 | Tb927.7.2720  |
| 198 | Tb10.61.2970   | 628 | Tb927.3.2960 | 1058 | Tb11.02.0352  |
| 199 | Tb10.61.3050   | 629 | Tb927.3.3310 | 1059 | Tb10.70.0640  |
| 200 | Tb10.61.3190   | 630 | Tb927.3.3320 | 1060 | Tb09.211.3955 |
| 201 | Tb10.6k15.0020 | 631 | Tb927.3.340  | 1061 | Tb927.2.2950  |
| 202 | Tb10.6k15.0030 | 632 | Tb927.3.3480 | 1062 | Tb11.02.0990  |
| 203 | Tb10.6k15.0040 | 633 | Tb927.3.370  | 1063 | Tb11.01.4370  |

|     |                |     |              |      |                |
|-----|----------------|-----|--------------|------|----------------|
| 204 | Tb10.6k15.0050 | 634 | Tb927.3.4220 | 1064 | Tb11.01.3960   |
| 205 | Tb10.6k15.0060 | 635 | Tb927.3.4290 | 1065 | Tb10.70.2620   |
| 206 | Tb10.6k15.0070 | 636 | Tb927.3.4310 | 1066 | Tb927.4.1850   |
| 207 | Tb10.6k15.0270 | 637 | Tb927.3.4320 | 1067 | Tb927.4.1310   |
| 208 | Tb10.6k15.0410 | 638 | Tb927.3.4330 | 1068 | Tb10.6k15.2760 |
| 209 | Tb10.6k15.0450 | 639 | Tb927.3.5030 | 1069 | Tb927.8.6940   |
| 210 | Tb10.6k15.0540 | 640 | Tb927.3.5280 | 1070 | Tb927.4.2770   |
| 211 | Tb10.6k15.0890 | 641 | Tb927.3.5530 | 1071 | Tb927.2.4980   |
| 212 | Tb10.6k15.0900 | 642 | Tb927.3.5540 | 1072 | Tb927.8.2860   |
| 213 | Tb10.6k15.0910 | 643 | Tb927.3.580  | 1073 | Tb927.4.3130   |
| 214 | Tb10.6k15.0920 | 644 | Tb927.3.590  | 1074 | Tb11.02.1190   |
| 215 | Tb10.6k15.0990 | 645 | Tb927.4.1220 | 1075 | Tb927.3.5620   |
| 216 | Tb10.6k15.1000 | 646 | Tb927.4.1930 | 1076 | Tb10.70.0310   |
| 217 | Tb10.6k15.1100 | 647 | Tb927.4.2710 | 1077 | Tb09.211.0610  |
| 218 | Tb10.6k15.1160 | 648 | Tb927.4.3190 | 1078 | Tb927.4.420    |
| 219 | Tb10.6k15.1180 | 649 | Tb927.4.3550 | 1079 | Tb927.7.570    |
| 220 | Tb10.6k15.1520 | 650 | Tb927.4.3930 | 1080 | Tb927.8.6050   |
| 221 | Tb10.6k15.1570 | 651 | Tb927.4.3990 | 1081 | Tb927.6.4750   |
| 222 | Tb10.6k15.1770 | 652 | Tb927.4.4000 | 1082 | Tb927.8.1190   |
| 223 | Tb10.6k15.1790 | 653 | Tb927.4.4010 | 1083 | Tb11.39.0004   |
| 224 | Tb10.6k15.1950 | 654 | Tb927.4.4020 | 1084 | Tb927.3.1200   |
| 225 | Tb10.6k15.2050 | 655 | Tb927.4.4250 | 1085 | Tb10.6k15.0380 |
| 226 | Tb10.6k15.2060 | 656 | Tb927.4.4270 | 1086 | Tb11.01.1450   |
| 227 | Tb10.6k15.2190 | 657 | Tb927.4.4290 | 1087 | Tb927.8.1500   |
| 228 | Tb10.6k15.2500 | 658 | Tb927.4.430  | 1088 | Tb927.4.2990   |
| 229 | Tb10.6k15.2610 | 659 | Tb927.4.4330 | 1089 | Tb927.1.1670   |
| 230 | Tb10.6k15.2620 | 660 | Tb927.4.4470 | 1090 | Tb11.02.3410   |
| 231 | Tb10.6k15.2770 | 661 | Tb927.4.4730 | 1091 | Tb10.61.1560   |
| 232 | Tb10.6k15.2890 | 662 | Tb927.4.4820 | 1092 | Tb927.4.920    |
| 233 | Tb10.6k15.2930 | 663 | Tb927.4.4830 | 1093 | Tb927.3.1150   |
| 234 | Tb10.6k15.3160 | 664 | Tb927.4.4840 | 1094 | Tb10.26.0670   |
| 235 | Tb10.6k15.3170 | 665 | Tb927.4.4850 | 1095 | Tb10.6k15.3800 |
| 236 | Tb10.6k15.3190 | 666 | Tb927.4.4860 | 1096 | Tb09.160.5620  |
| 237 | Tb10.6k15.3340 | 667 | Tb927.4.4870 | 1097 | Tb927.3.2750   |
| 238 | Tb10.6k15.3350 | 668 | Tb927.4.5260 | 1098 | Tb11.02.4300   |
| 239 | Tb10.6k15.3500 | 669 | Tb927.4.5270 | 1099 | Tb927.8.2460   |
| 240 | Tb10.6k15.3510 | 670 | Tb927.4.5300 | 1100 | Tb11.02.0270   |
| 241 | Tb10.6k15.3540 | 671 | Tb927.4.5400 | 1101 | Tb10.70.6570   |
| 242 | Tb10.6k15.3600 | 672 | Tb927.4.5410 | 1102 | Tb927.7.2380   |
| 243 | Tb10.6k15.3680 | 673 | Tb927.4.5420 | 1103 | Tb927.6.1900   |
| 244 | Tb10.6k15.3780 | 674 | Tb927.4.5430 | 1104 | Tb927.7.6090   |

|     |              |     |              |      |                |
|-----|--------------|-----|--------------|------|----------------|
| 245 | Tb10.70.0070 | 675 | Tb927.4.5460 | 1105 | Tb927.3.5180   |
| 246 | Tb10.70.0090 | 676 | Tb927.4.5530 | 1106 | Tb10.389.1290  |
| 247 | Tb10.70.0300 | 677 | Tb927.4.5560 | 1107 | Tb10.61.2260   |
| 248 | Tb10.70.0480 | 678 | Tb927.4.5580 | 1108 | Tb927.6.1530   |
| 249 | Tb10.70.0520 | 679 | Tb927.4.5700 | 1109 | Tb10.70.4540   |
| 250 | Tb10.70.0720 | 680 | Tb927.4.5790 | 1110 | Tb927.8.7490   |
| 251 | Tb10.70.0790 | 681 | Tb927.4.890  | 1111 | Tb11.01.1730   |
| 252 | Tb10.70.0800 | 682 | Tb927.5.1000 | 1112 | Tb10.6k15.2630 |
| 253 | Tb10.70.0820 | 683 | Tb927.5.1610 | 1113 | Tb927.8.5580   |
| 254 | Tb10.70.1100 | 684 | Tb927.5.230  | 1114 | Tb927.4.1270   |
| 255 | Tb10.70.1170 | 685 | Tb927.5.2760 | 1115 | Tb927.5.2260   |
| 256 | Tb10.70.1310 | 686 | Tb927.5.2900 | 1116 | Tb927.1.2210   |
| 257 | Tb10.70.1380 | 687 | Tb927.5.320  | 1117 | Tb11.01.7740   |
| 258 | Tb10.70.1440 | 688 | Tb927.5.350  | 1118 | Tb11.01.4030   |
| 259 | Tb10.70.1540 | 689 | Tb927.5.360  | 1119 | Tb927.7.4520   |
| 260 | Tb10.70.1560 | 690 | Tb927.5.370  | 1120 | Tb927.3.5060   |
| 261 | Tb10.70.1690 | 691 | Tb927.5.380  | 1121 | Tb10.6k15.3460 |
| 262 | Tb10.70.1880 | 692 | Tb927.5.3860 | 1122 | Tb10.6k15.0710 |
| 263 | Tb10.70.2140 | 693 | Tb927.5.390  | 1123 | Tb927.5.1460   |
| 264 | Tb10.70.2170 | 694 | Tb927.5.400  | 1124 | Tb927.5.3230   |
| 265 | Tb10.70.2420 | 695 | Tb927.5.4030 | 1125 | Tb10.70.5030   |
| 266 | Tb10.70.2440 | 696 | Tb927.5.4170 | 1126 | Tb10.6k15.0255 |
| 267 | Tb10.70.2465 | 697 | Tb927.5.4670 | 1127 | Tb11.01.0620   |
| 268 | Tb10.70.2470 | 698 | Tb927.5.4690 | 1128 | Tb11.18.0014   |
| 269 | Tb10.70.2490 | 699 | Tb927.5.4730 | 1129 | Tb09.160.0860  |
| 270 | Tb10.70.2520 | 700 | Tb927.5.4810 | 1130 | Tb11.02.2130   |
| 271 | Tb10.70.2610 | 701 | Tb927.5.4840 | 1131 | Tb10.389.0150  |
| 272 | Tb10.70.2680 | 702 | Tb927.5.4950 | 1132 | Tb11.02.2030   |
| 273 | Tb10.70.2700 | 703 | Tb927.5.5240 | 1133 | Tb927.1.1540   |
| 274 | Tb10.70.2720 | 704 | Tb927.5.650  | 1134 | Tb927.5.4310   |
| 275 | Tb10.70.2800 | 705 | Tb927.6.1460 | 1135 | Tb11.01.1090   |
| 276 | Tb10.70.3160 | 706 | Tb927.6.190  | 1136 | Tb10.61.2050   |
| 277 | Tb10.70.3360 | 707 | Tb927.6.220  | 1137 | Tb927.7.1430   |
| 278 | Tb10.70.3370 | 708 | Tb927.6.2700 | 1138 | Tb927.3.800    |
| 279 | Tb10.70.3440 | 709 | Tb927.6.2850 | 1139 | Tb927.3.4490   |
| 280 | Tb10.70.3480 | 710 | Tb927.6.300  | 1140 | Tb927.6.1430   |
| 281 | Tb10.70.3510 | 711 | Tb927.6.330  | 1141 | Tb10.70.0830   |
| 282 | Tb10.70.3600 | 712 | Tb927.6.3490 | 1142 | Tb927.3.1550   |
| 283 | Tb10.70.3660 | 713 | Tb927.6.3540 | 1143 | Tb10.26.0880   |
| 284 | Tb10.70.3950 | 714 | Tb927.6.4340 | 1144 | Tb927.3.2100   |
| 285 | Tb10.70.4060 | 715 | Tb927.6.450  | 1145 | Tb10.389.0210  |

|     |              |     |              |      |                |
|-----|--------------|-----|--------------|------|----------------|
| 286 | Tb10.70.4070 | 716 | Tb927.6.460  | 1146 | Tb927.5.1680   |
| 287 | Tb10.70.4155 | 717 | Tb927.6.480  | 1147 | Tb10.6k15.1410 |
| 288 | Tb10.70.4300 | 718 | Tb927.6.490  | 1148 | Tb11.02.2840   |
| 289 | Tb10.70.4350 | 719 | Tb927.6.4960 | 1149 | Tb10.389.1340  |
| 290 | Tb10.70.4400 | 720 | Tb927.6.4980 | 1150 | Tb927.3.3560   |
| 291 | Tb10.70.4510 | 721 | Tb927.6.510  | 1151 | Tb11.55.0024   |
| 292 | Tb10.70.4570 | 722 | Tb927.6.520  | 1152 | Tb11.01.7670   |
| 293 | Tb10.70.4700 | 723 | Tb927.6.5260 | 1153 | Tb11.03.0810   |
| 294 | Tb10.70.4750 | 724 | Tb927.6.530  | 1154 | Tb11.01.5820   |
| 295 | Tb10.70.4880 | 725 | Tb927.6.5370 | 1155 | Tb09.160.3710  |
| 296 | Tb10.70.5250 | 726 | Tb927.6.5450 | 1156 | Tb11.02.4540   |
| 297 | Tb10.70.5260 | 727 | Tb927.6.5550 | 1157 | Tb11.22.0004   |
| 298 | Tb10.70.5360 | 728 | Tb927.6.5740 | 1158 | Tb927.5.760    |
| 299 | Tb10.70.5460 | 729 | Tb927.6.640  | 1159 | Tb10.70.3750   |
| 300 | Tb10.70.5480 | 730 | Tb927.7.100  | 1160 | Tb09.211.1690  |
| 301 | Tb10.70.5520 | 731 | Tb927.7.1590 | 1161 | Tb927.3.2220   |
| 302 | Tb10.70.5840 | 732 | Tb927.7.1730 | 1162 | Tb927.6.4370   |
| 303 | Tb10.70.6010 | 733 | Tb927.7.1740 | 1163 | Tb927.8.6460   |
| 304 | Tb10.70.6300 | 734 | Tb927.7.1750 | 1164 | Tb10.05.0100   |
| 305 | Tb10.70.6325 | 735 | Tb927.7.1780 | 1165 | Tb09.244.2830  |
| 306 | Tb10.70.6360 | 736 | Tb927.7.1920 | 1166 | Tb927.2.3020   |
| 307 | Tb10.70.6650 | 737 | Tb927.7.230  | 1167 | Tb927.5.1230   |
| 308 | Tb10.70.6960 | 738 | Tb927.7.240  | 1168 | Tb09.211.3340  |
| 309 | Tb10.70.7480 | 739 | Tb927.7.2540 | 1169 | Tb927.8.5040   |
| 310 | Tb10.70.7570 | 740 | Tb927.7.290  | 1170 | Tb927.8.8280   |
| 311 | Tb11.01.0420 | 741 | Tb927.7.300  | 1171 | Tb927.6.4120   |
| 312 | Tb11.01.0625 | 742 | Tb927.7.3120 | 1172 | Tb11.v4.0005   |
| 313 | Tb11.01.0700 | 743 | Tb927.7.3260 | 1173 | Tb927.2.2230   |
| 314 | Tb11.01.0725 | 744 | Tb927.7.3450 | 1174 | Tb10.70.0510   |
| 315 | Tb11.01.0730 | 745 | Tb927.7.3490 | 1175 | Tb927.5.2850   |
| 316 | Tb11.01.0760 | 746 | Tb927.7.4060 | 1176 | Tb927.7.2170   |
| 317 | Tb11.01.0920 | 747 | Tb927.7.4070 | 1177 | Tb10.70.1030   |
| 318 | Tb11.01.1230 | 748 | Tb927.7.4160 | 1178 | Tb927.7.1670   |
| 319 | Tb11.01.1280 | 749 | Tb927.7.4170 | 1179 | Tb11.01.5680   |
| 320 | Tb11.01.1465 | 750 | Tb927.7.4180 | 1180 | Tb11.01.4920   |
| 321 | Tb11.01.1470 | 751 | Tb927.7.4670 | 1181 | Tb09.160.3890  |
| 322 | Tb11.01.1475 | 752 | Tb927.7.4790 | 1182 | Tb927.3.1290   |
| 323 | Tb11.01.1480 | 753 | Tb927.7.5000 | 1183 | Tb10.70.5350   |
| 324 | Tb11.01.1650 | 754 | Tb927.7.5020 | 1184 | Tb10.389.0680  |
| 325 | Tb11.01.1750 | 755 | Tb927.7.5230 | 1185 | Tb11.02.1910   |
| 326 | Tb11.01.1760 | 756 | Tb927.7.6040 | 1186 | Tb927.6.3140   |

|     |              |     |              |      |                |
|-----|--------------|-----|--------------|------|----------------|
| 327 | Tb11.01.1770 | 757 | Tb927.7.6050 | 1187 | Tb10.6k15.3810 |
| 328 | Tb11.01.1790 | 758 | Tb927.7.6060 | 1188 | Tb11.01.5780   |
| 329 | Tb11.01.1920 | 759 | Tb927.7.6070 | 1189 | Tb927.4.4660   |
| 330 | Tb11.01.2140 | 760 | Tb927.7.6080 | 1190 | Tb11.02.1720   |
| 331 | Tb11.01.2190 | 761 | Tb927.7.6500 | 1191 | Tb09.211.0690  |
| 332 | Tb11.01.2220 | 762 | Tb927.7.6540 | 1192 | Tb09.211.2700  |
| 333 | Tb11.01.2420 | 763 | Tb927.7.6960 | 1193 | Tb10.70.1490   |
| 334 | Tb11.01.2440 | 764 | Tb927.7.7380 | 1194 | Tb927.5.1900   |
| 335 | Tb11.01.2510 | 765 | Tb927.7.7520 | 1195 | Tb927.8.1140   |
| 336 | Tb11.01.2780 | 766 | Tb927.7.7530 | 1196 | Tb11.01.1300   |
| 337 | Tb11.01.2820 | 767 | Tb927.7.880  | 1197 | Tb10.389.1760  |
| 338 | Tb11.01.2886 | 768 | Tb927.8.1020 | 1198 | Tb11.02.4390   |
| 339 | Tb11.01.3020 | 769 | Tb927.8.1110 | 1199 | Tb09.211.1910  |
| 340 | Tb11.01.3260 | 770 | Tb927.8.130  | 1200 | Tb927.3.1030   |
| 341 | Tb11.01.3350 | 771 | Tb927.8.1330 | 1201 | Tb11.01.6770   |
| 342 | Tb11.01.3380 | 772 | Tb927.8.1340 | 1202 | Tb927.4.3320   |
| 343 | Tb11.01.3420 | 773 | Tb927.8.1610 | 1203 | Tb927.3.5520   |
| 344 | Tb11.01.3675 | 774 | Tb927.8.1620 | 1204 | Tb09.211.0410  |
| 345 | Tb11.01.3676 | 775 | Tb927.8.1630 | 1205 | Tb11.01.8770   |
| 346 | Tb11.01.3900 | 776 | Tb927.8.1640 | 1206 | Tb927.6.5030   |
| 347 | Tb11.01.4070 | 777 | Tb927.8.170  | 1207 | Tb11.01.7120   |
| 348 | Tb11.01.4520 | 778 | Tb927.8.1810 | 1208 | Tb10.6k15.0140 |
| 349 | Tb11.01.4600 | 779 | Tb927.8.1940 | 1209 | Tb927.3.1920   |
| 350 | Tb11.01.4660 | 780 | Tb927.8.2050 | 1210 | Tb927.8.4480   |
| 351 | Tb11.01.4750 | 781 | Tb927.8.2100 | 1211 | Tb927.8.3020   |
| 352 | Tb11.01.5300 | 782 | Tb927.8.2200 | 1212 | Tb927.7.6620   |
| 353 | Tb11.01.5350 | 783 | Tb927.8.2410 | 1213 | Tb10.389.1360  |
| 354 | Tb11.01.5450 | 784 | Tb927.8.2480 | 1214 | Tb11.47.0008   |
| 355 | Tb11.01.5500 | 785 | Tb927.8.2560 | 1215 | Tb927.3.3440   |
| 356 | Tb11.01.5510 | 786 | Tb927.8.2610 | 1216 | Tb927.8.670    |
| 357 | Tb11.01.5535 | 787 | Tb927.8.2640 | 1217 | Tb927.6.3290   |
| 358 | Tb11.01.5560 | 788 | Tb927.8.2810 | 1218 | Tb11.01.0720   |
| 359 | Tb11.01.5570 | 789 | Tb927.8.2910 | 1219 | Tb927.7.7460   |
| 360 | Tb11.01.5590 | 790 | Tb927.8.2920 | 1220 | Tb927.7.4220   |
| 361 | Tb11.01.5600 | 791 | Tb927.8.2930 | 1221 | Tb927.5.3210   |
| 362 | Tb11.01.5660 | 792 | Tb927.8.2940 | 1222 | Tb11.02.4460   |
| 363 | Tb11.01.5720 | 793 | Tb927.8.3310 | 1223 | Tb927.7.7070   |
| 364 | Tb11.01.5730 | 794 | Tb927.8.3370 | 1224 | Tb927.7.5340   |
| 365 | Tb11.01.5790 | 795 | Tb927.8.3620 | 1225 | Tb927.3.5340   |
| 366 | Tb11.01.5890 | 796 | Tb927.8.3650 | 1226 | Tb927.8.1270   |
| 367 | Tb11.01.5900 | 797 | Tb927.8.3750 | 1227 | Tb927.7.1060   |

|     |              |     |              |      |               |
|-----|--------------|-----|--------------|------|---------------|
| 368 | Tb11.01.5915 | 798 | Tb927.8.3800 | 1228 | Tb927.8.6240  |
| 369 | Tb11.01.5940 | 799 | Tb927.8.4010 | 1229 | Tb927.3.4810  |
| 370 | Tb11.01.6030 | 800 | Tb927.8.4060 | 1230 | Tb927.6.620   |
| 371 | Tb11.01.6060 | 801 | Tb927.8.4110 | 1231 | Tb927.5.900   |
| 372 | Tb11.01.6090 | 802 | Tb927.8.4180 | 1232 | Tb927.4.2180  |
| 373 | Tb11.01.6210 | 803 | Tb927.8.4280 | 1233 | Tb927.3.3200  |
| 374 | Tb11.01.6220 | 804 | Tb927.8.4410 | 1234 | Tb927.7.3170  |
| 375 | Tb11.01.6230 | 805 | Tb927.8.4430 | 1235 | Tb10.26.0800  |
| 376 | Tb11.01.6240 | 806 | Tb927.8.460  | 1236 | Tb927.5.3260  |
| 377 | Tb11.01.6250 | 807 | Tb927.8.4700 | 1237 | Tb927.8.4500  |
| 378 | Tb11.01.6530 | 808 | Tb927.8.4710 | 1238 | Tb11.01.1880  |
| 379 | Tb11.01.6800 | 809 | Tb927.8.4720 | 1239 | Tb927.6.1190  |
| 380 | Tb11.01.6870 | 810 | Tb927.8.4730 | 1240 | Tb927.7.6360  |
| 381 | Tb11.01.6880 | 811 | Tb927.8.4740 | 1241 | Tb927.7.7050  |
| 382 | Tb11.01.6930 | 812 | Tb927.8.480  | 1242 | Tb11.02.0340  |
| 383 | Tb11.01.6980 | 813 | Tb927.8.4890 | 1243 | Tb11.01.8400  |
| 384 | Tb11.01.7130 | 814 | Tb927.8.5030 | 1244 | Tb11.01.0870  |
| 385 | Tb11.01.7170 | 815 | Tb927.8.5090 | 1245 | Tb927.7.1820  |
| 386 | Tb11.01.7390 | 816 | Tb927.8.5210 | 1246 | Tb927.8.4220  |
| 387 | Tb11.01.7500 | 817 | Tb927.8.5260 | 1247 | Tb11.01.0790  |
| 388 | Tb11.01.7520 | 818 | Tb927.8.5450 | 1248 | Tb927.4.470   |
| 389 | Tb11.01.7535 | 819 | Tb927.8.5600 | 1249 | Tb11.01.4280  |
| 390 | Tb11.01.7545 | 820 | Tb927.8.5630 | 1250 | Tb11.01.4703  |
| 391 | Tb11.01.7680 | 821 | Tb927.8.570  | 1251 | Tb927.8.2330  |
| 392 | Tb11.01.7690 | 822 | Tb927.8.5710 | 1252 | Tb927.6.2940  |
| 393 | Tb11.01.7825 | 823 | Tb927.8.5740 | 1253 | Tb10.61.0330  |
| 394 | Tb11.01.7880 | 824 | Tb927.8.5880 | 1254 | Tb11.01.2020  |
| 395 | Tb11.01.7950 | 825 | Tb927.8.5970 | 1255 | Tb927.3.4000  |
| 396 | Tb11.01.7970 | 826 | Tb927.8.5980 | 1256 | Tb10.70.4840  |
| 397 | Tb11.01.8085 | 827 | Tb927.8.6030 | 1257 | Tb927.4.1740  |
| 398 | Tb11.01.8280 | 828 | Tb927.8.6090 | 1258 | Tb11.02.4950  |
| 399 | Tb11.01.8320 | 829 | Tb927.8.6150 | 1259 | Tb927.6.1470  |
| 400 | Tb11.01.8420 | 830 | Tb927.8.6160 | 1260 | Tb11.02.4650  |
| 401 | Tb11.01.8460 | 831 | Tb927.8.6180 | 1261 | Tb927.5.1020  |
| 402 | Tb11.01.8520 | 832 | Tb927.8.6200 | 1262 | Tb10.61.2440  |
| 403 | Tb11.02.0330 | 833 | Tb927.8.6210 | 1263 | Tb09.211.3160 |
| 404 | Tb11.02.0500 | 834 | Tb927.8.6450 | 1264 | Tb927.3.5420  |
| 405 | Tb11.02.0530 | 835 | Tb927.8.6510 | 1265 | Tb927.3.2350  |
| 406 | Tb11.02.0580 | 836 | Tb927.8.6540 | 1266 | Tb10.100.0150 |
| 407 | Tb11.02.0730 | 837 | Tb927.8.6680 | 1267 | Tb927.4.2040  |
| 408 | Tb11.02.0740 | 838 | Tb927.8.6950 | 1268 | Tb927.7.5760  |

|     |              |     |              |      |                |
|-----|--------------|-----|--------------|------|----------------|
| 409 | Tb11.02.0815 | 839 | Tb927.8.7120 | 1269 | Tb11.01.0160   |
| 410 | Tb11.02.0820 | 840 | Tb927.8.7140 | 1270 | Tb10.6k15.2350 |
| 411 | Tb11.02.0870 | 841 | Tb927.8.7150 | 1271 | Tb927.5.1820   |
| 412 | Tb11.02.1040 | 842 | Tb927.8.730  | 1272 | Tb09.211.2450  |
| 413 | Tb11.02.1090 | 843 | Tb927.8.7350 | 1273 | Tb10.61.2370   |
| 414 | Tb11.02.1105 | 844 | Tb927.8.740  | 1274 | Tb09.211.4360  |
| 415 | Tb11.02.1106 | 845 | Tb927.8.7450 | 1275 | Tb11.01.6690   |
| 416 | Tb11.02.1120 | 846 | Tb927.8.750  | 1276 | Tb09.160.3980  |
| 417 | Tb11.02.1135 | 847 | Tb927.8.7520 | 1277 | Tb927.3.2470   |
| 418 | Tb11.02.1280 | 848 | Tb927.8.7570 | 1278 | Tb927.5.2530   |
| 419 | Tb11.02.1564 | 849 | Tb927.8.7590 | 1279 | Tb927.4.2240   |
| 420 | Tb11.02.1600 | 850 | Tb927.8.760  | 1280 | Tb10.70.5060   |
| 421 | Tb11.02.1680 | 851 | Tb927.8.7600 | 1281 | Tb11.03.0690   |
| 422 | Tb11.02.1830 | 852 | Tb927.8.7610 | 1282 | Tb927.4.1890   |
| 423 | Tb11.02.1840 | 853 | Tb927.8.7620 | 1283 | Tb927.6.1870   |
| 424 | Tb11.02.2110 | 854 | Tb927.8.7630 | 1284 | Tb927.5.1270   |
| 425 | Tb11.02.2240 | 855 | Tb927.8.7640 | 1285 | Tb11.01.1640   |
| 426 | Tb11.02.2410 | 856 | Tb927.8.7650 | 1286 | Tb10.70.5010   |
| 427 | Tb11.02.2430 | 857 | Tb927.8.7670 | 1287 | Tb09.211.3930  |
| 428 | Tb11.02.2600 | 858 | Tb927.8.7680 | 1288 | Tb927.3.3710   |
| 429 | Tb11.02.2640 | 859 | Tb927.8.7700 | 1289 | Tb927.6.5070   |
| 430 | Tb11.02.2800 | 860 | Tb927.8.7740 | 1290 | Tb927.6.2210   |



Table S3. A list of initial features collected for distinguishing mitochondrial proteins from non-mitochondrial proteins in *T.brucei*. (The number in parentheses indicates the dimension of each property.)

| Type of properties                        | Features (dimension)                                                                                                                                                                                                         | Sources                                                                                                                                                                                                                                                                                                                                                              |
|-------------------------------------------|------------------------------------------------------------------------------------------------------------------------------------------------------------------------------------------------------------------------------|----------------------------------------------------------------------------------------------------------------------------------------------------------------------------------------------------------------------------------------------------------------------------------------------------------------------------------------------------------------------|
| Basic sequence attributes                 | Sequence length (1)<br>Split amino acid composition (40)<br>Di-peptide composition (400)                                                                                                                                     | Locally calculated                                                                                                                                                                                                                                                                                                                                                   |
| Physicochemical properties                | Secondary structural content (4)<br>Radius of Gyration (1)                                                                                                                                                                   | SSCP:<br><a href="http://coot.embl.de/SSCP">http://coot.embl.de/SSCP</a><br>Radius of Gyration:<br><a href="http://www.scfbio-iitd.res.in/software/proteomics/rg.jsp">http://www.scfbio-iitd.res.in/software/proteomics/rg.jsp</a>                                                                                                                                   |
|                                           | Composition, transition and distribution of:<br>hydrophobicity (21)<br>normalized Van der Waals volume (21)<br>polarity (21)<br>polarizability (21)<br>charge (21)<br>secondary structure (21)<br>solvent accessibility (21) | PROFEAT:<br><a href="http://jing.cz3.nus.edu.sg/cgi-bin/prof/prof.cgi">http://jing.cz3.nus.edu.sg/cgi-bin/prof/prof.cgi</a>                                                                                                                                                                                                                                          |
|                                           | Unfoldability (1)<br>Disordered regions (3)<br>Global charge (1)<br>Hydrophobicity (1)                                                                                                                                       | FoldIndex:<br><a href="http://bioportal.weizmann.ac.il/fldbin/findex">http://bioportal.weizmann.ac.il/fldbin/findex</a>                                                                                                                                                                                                                                              |
| Signal peptide and transmembrane topology | Signal peptide (3)<br>Transmembrane domains (alpha-helix and beta-barrel) (3)                                                                                                                                                | SignalP:<br><a href="http://www.cbs.dtu.dk/services/SignalP">http://www.cbs.dtu.dk/services/SignalP</a><br>Phobius:<br><a href="http://phobius.cbr.su.se">http://phobius.cbr.su.se</a><br>TMB-Hunt:<br><a href="http://bmbpcu36.leeds.ac.uk/~andy/betaBarrel/AACompPred//aaTMB_Hunt.cgi">http://bmbpcu36.leeds.ac.uk/~andy/betaBarrel/AACompPred//aaTMB_Hunt.cgi</a> |

Table S4. Features selected from initial feature list by feature selection program, and their discriminative power calculated with ANOVA based on the 597 mitochondrial proteins and 1290 non-mitochondrial proteins.

| Rank | Feature Description                      | $\mu^+(\sigma^+)$ | $\mu^-(\sigma^-)$ | F      | P-value   |
|------|------------------------------------------|-------------------|-------------------|--------|-----------|
| 1    | R% in 30NT residues                      | 0.109(0.054)      | 0.068(0.055)      | 227.46 | 0.000     |
| 2    | E% in 30NT residues                      | 0.025(0.035)      | 0.059(0.051)      | 210.64 | 0.000     |
| 3    | W% in remaining residues                 | 0.016(0.013)      | 0.011(0.008)      | 128.32 | 0.000     |
| 4    | Distribution of charge 3                 | 7.914(7.390)      | 4.349(6.135)      | 120.61 | 0.000     |
| 5    | Distribution of charge 6                 | 28.967(8.164)     | 24.829(8.559)     | 98.21  | 0.000     |
| 6    | D% in 30NT residues                      | 0.023(0.030)      | 0.042(0.043)      | 96.56  | 0.000     |
| 7    | Composition of Normalized vdw volumns 3  | 27.011(4.665)     | 24.741(5.055)     | 86.36  | 0.000     |
| 8    | Dipeptide MR%                            | 0.291(0.334)      | 0.167(0.238)      | 84.78  | 0.000     |
| 9    | Signal peptide                           | 0.136(0.179)      | 0.265(0.325)      | 81.09  | 0.000     |
| 10   | Y% in remaining residues                 | 0.033(0.016)      | 0.027(0.014)      | 73.06  | 0.000     |
| 11   | Dipeptide RW%                            | 0.145(0.242)      | 0.070(0.149)      | 69.35  | 1.110e-16 |
| 12   | Dipeptide YR%                            | 0.276(0.356)      | 0.165(0.246)      | 62.05  | 5.551e-15 |
| 13   | Composition of solvent accessibility 3   | 26.025(3.246)     | 24.652(3.741)     | 59.64  | 1.843e-14 |
| 14   | beta-barrel transmembrane (bbtm) score   | -0.462(0.337)     | -0.329(0.366)     | 57.21  | 6.073e-14 |
| 15   | Distribution of Normalized vdw volumns 5 | 26.616(4.020)     | 25.110(4.113)     | 55.45  | 1.449e-13 |
| 16   | Dipeptide PW%                            | 0.090(0.190)      | 0.040(0.105)      | 53.36  | 4.087e-13 |
| 17   | Dipeptide WW%                            | 0.046(0.154)      | 0.011(0.050)      | 52.95  | 4.997e-13 |
| 18   | log P BBTM/Non-BBTM protein ratio        | -2.076(1.825)     | -1.370(2.113)     | 49.6   | 2.632e-12 |
| 19   | Distribution of hydrophobicity 2         | 1.352(1.027)      | 1.010(0.993)      | 47.31  | 8.208e-12 |
| 20   | Distribution of charge 1                 | 2.032(2.693)      | 3.230(3.973)      | 44.77  | 2.909e-11 |
| 21   | Composition of Normalized vdw volumns 2  | 34.330(3.489)     | 35.693(4.537)     | 42.26  | 1.022e-10 |
| 22   | Dipeptide KK%                            | 0.317(0.441)      | 0.530(0.748)      | 41.55  | 1.456e-10 |
| 23   | F% in 30NT residues                      | 0.049(0.041)      | 0.036(0.040)      | 41.24  | 1.701e-10 |
| 24   | Distribution of Normalized vdw volumns 1 | 1.328(1.015)      | 1.005(1.020)      | 41.22  | 1.719e-10 |
| 25   | Transition of polarizability 3           | 21.963(3.851)     | 20.727(3.936)     | 40.83  | 2.088e-10 |
| 26   | Distribution of charge 11                | 52.566(9.064)     | 49.566(9.680)     | 40.78  | 2.139e-10 |
| 27   | Dipeptide WR%                            | 0.149(0.259)      | 0.084(0.180)      | 39.92  | 3.290e-10 |
| 28   | Transition of Normalized vdw volumns 1   | 26.171(3.815)     | 27.531(4.601)     | 39.59  | 3.881e-10 |
| 29   | P% in remaining residues                 | 0.050(0.018)      | 0.043(0.024)      | 38.82  | 5.719e-10 |
| 30   | Transition of polarizability 1           | 25.733(3.921)     | 26.970(4.075)     | 38.47  | 6.828e-10 |
| 31   | Distribution of charge 4                 | 21.784(6.317)     | 23.879(7.294)     | 36.53  | 1.805e-09 |
| 32   | Dipeptide ML%                            | 0.321(0.375)      | 0.228(0.273)      | 36.45  | 1.884e-09 |
| 33   | Transition of Normalized                 | 19.480(3.146)     | 18.439(3.663)     | 35.97  | 2.390e-09 |

|    |                                            |               |               |       |           |
|----|--------------------------------------------|---------------|---------------|-------|-----------|
|    | vdw volumes 2                              |               |               |       |           |
| 34 | Composition of polarizability 1            | 31.780(4.405) | 33.165(4.819) | 35.57 | 2.937e-09 |
| 35 | Distribution of secondary structure 3      | 1.857(1.864)  | 1.386(1.467)  | 35.27 | 3.413e-09 |
| 36 | Dipeptide YP%                              | 0.168(0.268)  | 0.106(0.189)  | 34.03 | 6.381e-09 |
| 37 | H% in remaining residues                   | 0.026(0.012)  | 0.023(0.011)  | 33.33 | 9.087e-09 |
| 38 | I% in remaining residues                   | 0.040(0.014)  | 0.045(0.017)  | 33.31 | 9.163e-09 |
| 39 | Number of predicted transmembrane segments | 0.323(0.848)  | 1.021(2.909)  | 33.03 | 1.057e-08 |
| 40 | W% in 30NT residues                        | 0.013(0.022)  | 0.008(0.017)  | 32.01 | 1.767e-08 |
| 41 | Dipeptide CK%                              | 0.113(0.233)  | 0.064(0.141)  | 31.71 | 2.055e-08 |
| 42 | Dipeptide RF%                              | 0.302(0.323)  | 0.218(0.294)  | 31.08 | 2.839e-08 |
| 43 | Dipeptide RH%                              | 0.248(0.316)  | 0.173(0.252)  | 30.98 | 2.974e-08 |
| 44 | C% in remaining residues                   | 0.016(0.011)  | 0.020(0.013)  | 30.89 | 3.119e-08 |
| 45 | Transition of polarity 2                   | 23.137(3.667) | 21.918(4.788) | 30.47 | 3.867e-08 |
| 46 | Dipeptide RY%                              | 0.275(0.311)  | 0.196(0.278)  | 30.3  | 4.210e-08 |
| 47 | Dipeptide RM%                              | 0.206(0.283)  | 0.141(0.219)  | 30.2  | 4.418e-08 |
| 48 | Distribution of hydrophobicity 5           | 23.237(3.637) | 24.271(3.882) | 30.11 | 4.623e-08 |
| 49 | K% in 30NT residues                        | 0.040(0.041)  | 0.054(0.058)  | 30.03 | 4.832e-08 |
| 50 | Distribution of polarity 2                 | 1.421(1.047)  | 1.108(1.205)  | 29.89 | 5.176e-08 |
| 51 | Transition of polarity 3                   | 20.096(3.050) | 21.253(4.741) | 29.82 | 5.369e-08 |
| 52 | Dipeptide PL%                              | 0.530(0.460)  | 0.417(0.397)  | 29.8  | 5.432e-08 |
| 53 | Dipeptide EW%                              | 0.116(0.217)  | 0.070(0.144)  | 29.39 | 6.679e-08 |
| 54 | M% in remaining residues                   | 0.026(0.012)  | 0.023(0.012)  | 29.06 | 7.900e-08 |
| 55 | Dipeptide HR%                              | 0.221(0.297)  | 0.153(0.233)  | 29.04 | 7.991e-08 |
| 56 | Charge                                     | 0.026(0.026)  | 0.037(0.049)  | 28.67 | 9.609e-08 |
| 57 | N% in remaining residues                   | 0.036(0.012)  | 0.039(0.015)  | 28.48 | 1.062e-07 |
| 58 | Dipeptide HV%                              | 0.289(0.309)  | 0.385(0.396)  | 27.48 | 1.770e-07 |
| 59 | Dipeptide FR%                              | 0.283(0.363)  | 0.203(0.286)  | 26.93 | 2.337e-07 |
| 60 | Dipeptide RR%                              | 0.808(0.628)  | 0.617(0.798)  | 26.73 | 2.588e-07 |
| 61 | Distribution of polarizability 4           | 25.859(3.426) | 24.950(3.622) | 26.61 | 2.757e-07 |
| 62 | Dipeptide KT%                              | 0.234(0.288)  | 0.327(0.396)  | 26.39 | 3.073e-07 |
| 63 | Dipeptide WT%                              | 0.083(0.194)  | 0.047(0.115)  | 26.13 | 3.523e-07 |
| 64 | Dipeptide LP%                              | 0.525(0.425)  | 0.424(0.391)  | 26.01 | 3.746e-07 |
| 65 | Dipeptide CK%                              | 0.065(0.149)  | 0.120(0.244)  | 25.97 | 3.809e-07 |
| 66 | Dipeptide DD%                              | 0.269(0.440)  | 0.426(0.693)  | 25.87 | 4.022e-07 |

The  $\mu^+$ ,  $\mu^-$  and  $\sigma^+$ ,  $\sigma^-$  are the means and standard deviations of each feature element in positive and negative datasets, respectively.

Table S5. Five-fold cross validation accuracy of various kinds of amino acid composition (AAC), based on 597 mitochondrial proteins and 1290 non-mitochondrial proteins.

|              | AAC in whole sequences | AAC in the first $n$ N-terminal residues and in the remaining residues |          |          |          |          |
|--------------|------------------------|------------------------------------------------------------------------|----------|----------|----------|----------|
|              |                        | $n = 15$                                                               | $n = 20$ | $n = 25$ | $n = 30$ | $n = 35$ |
| Accuracy (%) | 78.4831                | 85.1746                                                                | 85.2042  | 85.4532  | 85.5731  | 85.4625  |

Table S6. Frequency of signal peptide (SP), alpha-helical transmembrane domain (TM) and beta-barrel TM in mitochondrial proteins (mp) and non-mitochondrial proteins (non-mp) in *T.brucei*, yeast, mouse and human. Data in the table indicates the percentage of proteins with SP, alpha-helical TM or beta-barrel TM.

| Organisms       | SP (%) |        | Alpha-helical TM (%) |        | Beta-barrel TM (%) |        |
|-----------------|--------|--------|----------------------|--------|--------------------|--------|
|                 | mp     | non-mp | mp                   | non-mp | mp                 | non-mp |
| <i>T.brucei</i> | 6.87   | 21.01  | 20.10                | 21.55  | 9.38               | 18.06  |
| Yeast           | 9.55   | 16.24  | 26.09                | 26.28  | 19.28              | 30.18  |
| Mouse           | 9.89   | 27.17  | 22.76                | 27.63  | 14.18              | 14.42  |
| Human           | 8.86   | 26.88  | 22.61                | 27.66  | 13.63              | 16.85  |

Table S7. Thirteen prediction programs used for comparison.

| <b>Program</b>   | <b>URL</b>                                                                                                                      |
|------------------|---------------------------------------------------------------------------------------------------------------------------------|
| WoLF PSORT       | <a href="http://wolfsort.org/">http://wolfsort.org/</a>                                                                         |
| Predotar v1.03   | <a href="http://urgi.versailles.inra.fr/predotar/predotar.html">http://urgi.versailles.inra.fr/predotar/predotar.html</a>       |
| MitoProt II      | <a href="http://ihg2.helmholtz-muenchen.de/ihg/mitoprot.html">http://ihg2.helmholtz-muenchen.de/ihg/mitoprot.html</a>           |
| PredSL           | <a href="http://hannibal.biol.uoa.gr/PredSL/input.html">http://hannibal.biol.uoa.gr/PredSL/input.html</a>                       |
| PSORT II         | <a href="http://psort.ims.u-tokyo.ac.jp/form2.html">http://psort.ims.u-tokyo.ac.jp/form2.html</a>                               |
| TargetP v1.1     | <a href="http://www.cbs.dtu.dk/services/TargetP/">http://www.cbs.dtu.dk/services/TargetP/</a>                                   |
| MitPred          | <a href="http://www.imtech.res.in/raghava/mitpred/submit.html">http://www.imtech.res.in/raghava/mitpred/submit.html</a>         |
| MITOPRED         | <a href="http://bioapps.rit.albany.edu/MITOPRED/">http://bioapps.rit.albany.edu/MITOPRED/</a>                                   |
| iPSORT           | <a href="http://hc.ims.u-tokyo.ac.jp/iPSORT/">http://hc.ims.u-tokyo.ac.jp/iPSORT/</a>                                           |
| Proteome Analyst | <a href="http://pasub.cs.ualberta.ca:8080/pa/Subcellular">http://pasub.cs.ualberta.ca:8080/pa/Subcellular</a>                   |
| ESLpred          | <a href="http://www.imtech.res.in/raghava/eslpred/submit.html">http://www.imtech.res.in/raghava/eslpred/submit.html</a>         |
| PLOC             | <a href="http://www.genome.jp/SIT/plocdir/">http://www.genome.jp/SIT/plocdir/</a>                                               |
| SubLoc v1.0      | <a href="http://www.bioinfo.tsinghua.edu.cn/SubLoc/eu_predict.htm">http://www.bioinfo.tsinghua.edu.cn/SubLoc/eu_predict.htm</a> |

Table S8. Reciprocal best blast list between T.brucei mitocarta proteins and human or yeast mitocarta proteins.

| <b>Gene ID</b> | <b>RBB pair partner ID</b> |
|----------------|----------------------------|
| Tb09.160.2210  | YPL059W                    |
| Tb09.160.3110  | YLR163C                    |
| Tb09.160.4300  | YBR003W                    |
| Tb09.160.4380  | YLL041C                    |
| Tb09.160.4440  | YGR029W                    |
| Tb09.160.5260  | YBR026C                    |
| Tb09.211.0510  | YBR024W                    |
| Tb09.211.1380  | YAL044C                    |
| Tb09.211.1610  | YNL169C                    |
| Tb09.211.1750  | YER053C                    |
| Tb09.211.1880  | YKR070W                    |
| Tb09.211.1960  | YOL096C                    |
| Tb09.211.2580  | YMR188C                    |
| Tb09.211.3030  | YKR066C                    |
| Tb09.211.3200  | YIL006W                    |
| Tb09.211.3420  | YDR236C                    |
| Tb09.211.4700  | YEL024W                    |
| Tb10.05.0150   | YNR001C                    |
| Tb10.100.0070  | YBR039W                    |
| Tb10.100.0160  | YLR038C                    |
| Tb10.389.0890  | YER178W                    |
| Tb10.61.0340   | YPL224C                    |
| Tb10.61.0510   | YLL018C-A                  |
| Tb10.61.1530   | YOR196C                    |
| Tb10.61.1810   | YBL030C                    |
| Tb10.6k15.0960 | YMR145C                    |
| Tb10.6k15.3030 | YPR024W                    |
| Tb10.6k15.3080 | YNL071W                    |
| Tb10.6k15.3140 | YOR241W                    |
| Tb10.6k15.3250 | YGR244C                    |
| Tb10.70.0280   | YLR259C                    |
| Tb10.70.2155   | YPL271W                    |
| Tb10.70.2190   | YLR069C                    |
| Tb10.70.2290   | YPR011C                    |
| Tb10.70.2630   | YMR150C                    |
| Tb10.70.2970   | YDR529C                    |
| Tb10.70.4280   | YHR037W                    |
| Tb10.70.4380   | YPL132W                    |
| Tb10.70.4600   | YLR289W                    |
| Tb10.70.5110   | YKL085W                    |
| Tb10.70.5510   | YDR376W                    |
| Tb10.70.7960   | YPL005W                    |
| Tb11.01.0710   | YJL102W                    |
| Tb11.01.1130   | YNR041C                    |
| Tb11.01.1160   | YLR239C                    |
| Tb11.01.1440   | YDR019C                    |

|              |           |
|--------------|-----------|
| Tb11.01.1740 | YIL125W   |
| Tb11.01.2280 | YML110C   |
| Tb11.01.3550 | YDR148C   |
| Tb11.01.3780 | YER141W   |
| Tb11.01.4870 | YJL143W   |
| Tb11.01.5180 | YDR204W   |
| Tb11.01.7090 | YER048W-A |
| Tb11.01.7110 | YBL013W   |
| Tb11.01.8470 | YFL018C   |
| Tb11.01.8700 | YMR301C   |
| Tb11.02.1520 | YDR511W   |
| Tb11.02.2280 | YGR112W   |
| Tb11.02.2960 | YOR100C   |
| Tb11.02.3130 | YKL029C   |
| Tb11.02.3530 | YFL036W   |
| Tb11.02.4020 | YER154W   |
| Tb11.02.5280 | YIL155C   |
| Tb11.02.5670 | YPL013C   |
| Tb11.03.0870 | YOR130C   |
| Tb11.03.0950 | YGR207C   |
| Tb11.47.0012 | YDR513W   |
| Tb927.1.1000 | YIL042C   |
| Tb927.1.2990 | YLR067C   |
| Tb927.2.2970 | YDL198C   |
| Tb927.2.3030 | YDR258C   |
| Tb927.2.4110 | YHR024C   |
| Tb927.2.4400 | YKR042W   |
| Tb927.2.4700 | YKR065C   |
| Tb927.2.4890 | YNL185C   |
| Tb927.2.5210 | YKL055C   |
| Tb927.3.1000 | YDL120W   |
| Tb927.3.1380 | YJR121W   |
| Tb927.3.1790 | YBR221C   |
| Tb927.3.2230 | YOR142W   |
| Tb927.3.2300 | YNL310C   |
| Tb927.3.2980 | YJL133W   |
| Tb927.3.4890 | YOR125C   |
| Tb927.3.860  | YKL192C   |
| Tb927.4.1810 | YML009C   |
| Tb927.4.2480 | YML060W   |
| Tb927.4.3300 | YMR089C   |
| Tb927.5.1030 | YPR067W   |
| Tb927.5.1310 | YPL172C   |
| Tb927.5.1520 | YBR227C   |
| Tb927.5.3980 | YNL284C   |
| Tb927.5.4080 | YMR060C   |
| Tb927.5.500  | YOR266W   |
| Tb927.6.2170 | YOR232W   |



|               |                     |
|---------------|---------------------|
| Tb927.6.2420  | YIL070C             |
| Tb927.6.2510  | YOL071W             |
| Tb927.6.4040  | YMR193W             |
| Tb927.6.4990  | YDL004W             |
| Tb927.7.1340  | YOR020C             |
| Tb927.7.1640  | YMR023C             |
| Tb927.7.1720  | YKL040C             |
| Tb927.7.1910  | YMR189W             |
| Tb927.7.3960  | YBL038W             |
| Tb927.7.4940  | YNL221C             |
| Tb927.7.5120  | YOR201C             |
| Tb927.7.5820  | YGR255C             |
| Tb927.7.890   | YPL252C             |
| Tb927.8.1030  | YGL018C             |
| Tb927.8.1240  | YOR356W             |
| Tb927.8.1860  | YDR430C             |
| Tb927.8.1890  | YOR065W             |
| Tb927.8.3560  | YML061C             |
| Tb927.8.3580  | YDR375C             |
| Tb927.8.3690  | YDL066W             |
| Tb927.8.4810  | YGR132C             |
| Tb927.8.5120  | YEL039C             |
| Tb927.8.5540  | YLL027W             |
| Tb927.8.6580  | YKL148C             |
| Tb09.160.2210 | Q86SX6 GLRX5_HUMAN  |
| Tb09.160.3110 | O75439 MPPB_HUMAN   |
| Tb09.160.4300 | Q5T2R2-3 DPS1_HUMAN |
| Tb09.160.4310 | P49448 DHE4_HUMAN   |
| Tb09.160.4380 | P21912 DHSB_HUMAN   |
| Tb09.160.4910 | O15229 KMO_HUMAN    |
| Tb09.160.5240 | Q9HD33-2 RM47_HUMAN |
| Tb09.160.5260 | Q9BV79 MECR_HUMAN   |
| Tb09.211.0330 | Q96EY1 DNJA3_HUMAN  |
| Tb09.211.1380 | P23434 GCSH_HUMAN   |
| Tb09.211.1750 | Q00325-2 MPCP_HUMAN |
| Tb09.211.1960 | Q9NZJ6 COQ3_HUMAN   |
| Tb09.211.2580 | Q9Y2R5 RT17_HUMAN   |
| Tb09.211.4580 | P54886 P5CS_HUMAN   |
| Tb09.211.4700 | P47985 UCRI_HUMAN   |
| Tb09.244.2620 | Q16795 NDUA9_HUMAN  |
| Tb10.05.0150  | O75390 CISY_HUMAN   |
| Tb10.100.0070 | P36542 ATPG_HUMAN   |
| Tb10.389.0690 | Q02978 M2OM_HUMAN   |
| Tb10.389.1140 | P28331 NDUS1_HUMAN  |
| Tb10.61.0510  | Q49B96 COX19_HUMAN  |
| Tb10.61.1530  | O43766 LIAS_HUMAN   |
| Tb10.61.1790  | P56556 NDUA6_HUMAN  |
| Tb10.61.1810  | Q9H0C2 ADT4_HUMAN   |

|                |                      |
|----------------|----------------------|
| Tb10.61.2510   | Q70HW3-2 SAMC_HUMAN  |
| Tb10.61.3070   | Q8N5M1 ATPF2_HUMAN   |
| Tb10.6k15.0490 | Q99797 MIPEP_HUMAN   |
| Tb10.6k15.0960 | Q9BRQ8-2 AIFM2_HUMAN |
| Tb10.6k15.3030 | Q96TA2 YMEL1_HUMAN   |
| Tb10.6k15.3080 | P10515 ODP2_HUMAN    |
| Tb10.6k15.3140 | Q05932 FOLC_HUMAN    |
| Tb10.6k15.3250 | Q96I99 SUCB2_HUMAN   |
| Tb10.70.0280   | P10809 CH60_HUMAN    |
| Tb10.70.2155   | P56381 ATP5E_HUMAN   |
| Tb10.70.2190   | Q96RP9 EFGM_HUMAN    |
| Tb10.70.2290   | Q86VD7 S2542_HUMAN   |
| Tb10.70.2630   | Q96LU5 IMP1L_HUMAN   |
| Tb10.70.2970   | P14927 QCR7_HUMAN    |
| Tb10.70.3280   | Q13825 AUHM_HUMAN    |
| Tb10.70.3850   | Q9Y2Z2-5 MTO1_HUMAN  |
| Tb10.70.4280   | P30038 AL4A1_HUMAN   |
| Tb10.70.4380   | Q9Y6N1 COX11_HUMAN   |
| Tb10.70.4980   | Q9Y6N5 SQRD_HUMAN    |
| Tb10.70.5110   | P40926 MDHM_HUMAN    |
| Tb10.70.5510   | P22570 ADRO_HUMAN    |
| Tb10.70.7550   | P12694 ODBA_HUMAN    |
| Tb10.v4.0043   | P21953 ODBB_HUMAN    |
| Tb11.01.0640   | Q9P0J0 NDUAD_HUMAN   |
| Tb11.01.0710   | Q969S9 RRF2M_HUMAN   |
| Tb11.01.1130   | Q96H96-2 COQ2_HUMAN  |
| Tb11.01.1320   | Q8NE62 CHDH_HUMAN    |
| Tb11.01.1440   | P48728 GCST_HUMAN    |
| Tb11.01.3550   | P36957 ODO2_HUMAN    |
| Tb11.01.3760   | Q9Y3D2 MSRB2_HUMAN   |
| Tb11.01.3780   | Q7KZN9 COX15_HUMAN   |
| Tb11.01.4870   | Q9Y584 TIM22_HUMAN   |
| Tb11.01.5180   | Q9Y3A0 COQ4_HUMAN    |
| Tb11.01.7110   | Q96DP5 FMT_HUMAN     |
| Tb11.01.7460   | Q9Y6M9 NDUB9_HUMAN   |
| Tb11.01.8200   | Q6NVY1 HIBCH_HUMAN   |
| Tb11.01.8470   | P09622 DLDH_HUMAN    |
| Tb11.01.8700   | O75027 ABCB7_HUMAN   |
| Tb11.02.0250   | Q12931 TRAP1_HUMAN   |
| Tb11.02.0290   | P55809 SCOT1_HUMAN   |
| Tb11.02.2280   | Q15526 SURF1_HUMAN   |
| Tb11.02.2740   | P00505 AATM_HUMAN    |
| Tb11.02.2960   | Q9Y619 ORNT1_HUMAN   |
| Tb11.02.3530   | O00411 RPOM_HUMAN    |
| Tb11.02.3810   | Q9BYD3 RM04_HUMAN    |
| Tb11.02.4020   | Q8N8Q8 COX18_HUMAN   |
| Tb11.02.4480   | Q9HCC0 MCCB_HUMAN    |

|              |                      |
|--------------|----------------------|
| Tb11.02.5280 | P43304 GPDM_HUMAN    |
| Tb11.02.5530 | P13804 ETFA_HUMAN    |
| Tb11.03.0260 | Q16540 RM23_HUMAN    |
| Tb11.03.0950 | P38117 ETFB_HUMAN    |
| Tb11.47.0009 | Q8IXM3 RM41_HUMAN    |
| Tb11.47.0012 | Q9NS18-2 GLRX2_HUMAN |
| Tb11.47.0017 | O75251 NDUS7_HUMAN   |
| Tb11.55.0026 | P26440 IVD_HUMAN     |
| Tb927.1.1000 | Q16654 PDK4_HUMAN    |
| Tb927.2.4890 | Q9Y3B7 RM11_HUMAN    |
| Tb927.3.1000 | Q16595 FRDA_HUMAN    |
| Tb927.3.1380 | P06576 ATPB_HUMAN    |
| Tb927.3.1710 | Q96A35 RM24_HUMAN    |
| Tb927.3.1790 | P11177-2 ODPB_HUMAN  |
| Tb927.3.2230 | P53597 SUCA_HUMAN    |
| Tb927.3.2980 | Q9NYZ2 MFRN1_HUMAN   |
| Tb927.3.4890 | Q99807 COQ7_HUMAN    |
| Tb927.3.5610 | P09001 RM03_HUMAN    |
| Tb927.3.860  | O14561 ACPM_HUMAN    |
| Tb927.4.1070 | Q9BYD1 RM13_HUMAN    |
| Tb927.4.1660 | Q6KCM7-6 SCMC2_HUMAN |
| Tb927.4.2480 | O15527 OGG1_HUMAN    |
| Tb927.4.2700 | P35914 HMGCL_HUMAN   |
| Tb927.4.3300 | Q9Y4W6 AFG32_HUMAN   |
| Tb927.4.4910 | P42126 D3D2_HUMAN    |
| Tb927.4.4980 | P10109 ADX_HUMAN     |
| Tb927.5.1310 | Q12887 COX10_HUMAN   |
| Tb927.5.1520 | O76031 CLPX_HUMAN    |
| Tb927.5.1550 | Q9BSK2 S2533_HUMAN   |
| Tb927.5.3410 | Q9BYD2 RM09_HUMAN    |
| Tb927.5.3980 | Q9P015 RM15_HUMAN    |
| Tb927.5.4330 | P11182 ODB2_HUMAN    |
| Tb927.5.450  | P49821-2 NDUV1_HUMAN |
| Tb927.6.1250 | P51398 RT29_HUMAN    |
| Tb927.6.2170 | Q9HAV7 GRPE1_HUMAN   |
| Tb927.6.4990 | P30049 ATPD_HUMAN    |
| Tb927.7.1340 | P61604 CH10_HUMAN    |
| Tb927.7.1910 | P23378 GCSP_HUMAN    |
| Tb927.7.2200 | Q9Y5J7 TIM9_HUMAN    |
| Tb927.7.3470 | Q07021 C1QBP_HUMAN   |
| Tb927.7.3770 | Q8NCW5 AIBP_HUMAN    |
| Tb927.7.4710 | Q9H2W6 RM46_HUMAN    |
| Tb927.7.5820 | Q9Y2Z9 COQ6_HUMAN    |
| Tb927.7.6350 | P19404 NDUV2_HUMAN   |
| Tb927.8.1060 | O95822 DCMC_HUMAN    |
| Tb927.8.1240 | Q16134 ETFD_HUMAN    |
| Tb927.8.1860 | Q5JRX3 PREP_HUMAN    |

|              |                    |
|--------------|--------------------|
| Tb927.8.1890 | P08574 CY1_HUMAN   |
| Tb927.8.1990 | P30048 PRDX3_HUMAN |
| Tb927.8.2540 | P22307 NLTP_HUMAN  |
| Tb927.8.3580 | Q9Y276 BCS1_HUMAN  |
| Tb927.8.3690 | P48735 IDHP_HUMAN  |
| Tb927.8.4810 | P35232 PHB_HUMAN   |
| Tb927.8.5120 | P99999 CYC_HUMAN   |
| Tb927.8.5540 | Q9BUE6 ISCA1_HUMAN |
| Tb927.8.5810 | Q8N8R3 MCATL_HUMAN |
| Tb927.8.6060 | O75600 KBL_HUMAN   |
| Tb927.8.6110 | P54868 HMCS2_HUMAN |
| Tb927.8.6580 | P31040 DHSA_HUMAN  |
| Tb927.8.6970 | Q96RQ3 MCCA_HUMAN  |

Table S9. Expression profile of the mitocarta from long slender (LS), short stumpy (SS) and procyclic (PC) trypanosomes.

| Gene ID      | LS  | SS  | PC  | Description                                                                       |
|--------------|-----|-----|-----|-----------------------------------------------------------------------------------|
| Tb927.2.1860 | 159 | 164 | 98  | hypothetical protein, conserved                                                   |
| Tb927.2.2210 | 16  | 17  | 30  | hypothetical protein, conserved                                                   |
| Tb927.2.2220 | 4   | 9   | 3   | hypothetical protein, conserved                                                   |
| Tb927.2.2400 | 48  | 29  | 3   | hypothetical protein, conserved                                                   |
| Tb927.2.2470 | 8   | 7   | 34  | RNA-editing complex protein; KREPA1                                               |
| Tb927.2.2510 | 3   | 1   | 48  | hypothetical protein, conserved                                                   |
| Tb927.2.2940 | 3   | 7   | 31  | hypothetical protein, conserved                                                   |
| Tb927.2.2970 | 55  | 56  | 84  | mitochondrial carrier protein, putative                                           |
| Tb927.2.3030 | 13  | 14  | 92  | ATP-dependent Clp protease subunit, heat shock protein 78 (HSP78), putative       |
| Tb927.2.3180 | 0   | 0   | 0   | hypothetical protein, conserved                                                   |
| Tb927.2.3330 | 43  | 11  | 1   | hypothetical protein                                                              |
| Tb927.2.3420 | 32  | 41  | 12  | hypothetical protein, conserved                                                   |
| Tb927.2.3610 | 106 | 93  | 209 | hypothetical protein, conserved                                                   |
| Tb927.2.3800 | 1   | 1   | 9   | hypothetical protein, conserved                                                   |
| Tb927.2.4110 | 4   | 5   | 3   | mitochondrial processing peptidase alpha subunit, putative                        |
| Tb927.2.4130 | 23  | 25  | 23  | enoyl-CoA hydratase/Enoyl-CoA isomerase/3-hydroxyacyl-CoA dehydrogenase, putative |
| Tb927.2.4380 | 38  | 16  | 26  | hypothetical protein, conserved                                                   |
| Tb927.2.4400 | 50  | 90  | 26  | hypothetical protein, conserved                                                   |
| Tb927.2.4590 | 18  | 14  | 56  | branched-chain amino acid aminotransferase, putative                              |
| Tb927.2.4610 | 13  | 13  | 61  | branched-chain amino acid aminotransferase, putative                              |
| Tb927.2.4700 | 9   | 13  | 12  | hypothetical protein, conserved                                                   |
| Tb927.2.4740 | 1   | 1   | 9   | ribosomal protein L11, putative                                                   |
| Tb927.2.4830 | 4   | 3   | 3   | TFIIF-stimulated CTD phosphatase, putative                                        |
| Tb927.2.4890 | 1   | 2   | 7   | ribosomal protein L11, putative                                                   |
| Tb927.2.4990 | 3   | 2   | 5   | hypothetical protein, conserved                                                   |
| Tb927.2.5020 | 43  | 29  | 32  | hypothetical protein, conserved                                                   |
| Tb927.2.5140 | 15  | 9   | 12  | hypothetical protein, conserved                                                   |
| Tb927.2.5180 | 26  | 21  | 45  | aldo-keto reductase, putative                                                     |
| Tb927.2.5210 | 51  | 41  | 51  | 3-oxoacyl-(acyl-carrier protein) reductase, putative                              |
| Tb927.2.5720 | 0   | 0   | 0   | hypothetical protein                                                              |
| Tb927.2.5900 | 13  | 8   | 7   | hypothetical protein, conserved                                                   |
| Tb927.2.5930 | 4   | 6   | 5   | hypothetical protein, conserved                                                   |
| Tb927.2.6070 | 116 | 150 | 79  | hypothetical protein, conserved                                                   |
| Tb927.3.750  | 0   | 0   | 0   | hypothetical protein, conserved                                                   |
| Tb927.3.770  | 2   | 2   | 6   | hypothetical protein, conserved                                                   |
| Tb927.3.820  | 9   | 6   | 6   | hypothetical protein, conserved                                                   |
| Tb927.3.860  | 491 | 432 | 377 | acyl carrier protein, mitochondrial precursor, putative                           |
| Tb927.3.940  | 16  | 21  | 40  | hypothetical protein, conserved                                                   |
| Tb927.3.950  | 209 | 210 | 20  | hypothetical protein, conserved                                                   |
| Tb927.3.970  | 750 | 736 | 465 | hypothetical protein, conserved                                                   |
| Tb927.3.1000 | 23  | 18  | 92  | frataxin-like, mitochondrial precursor, putative                                  |
| Tb927.3.1100 | 20  | 11  | 61  | hypothetical protein, conserved                                                   |
| Tb927.3.1160 | 21  | 15  | 32  | hypothetical protein, conserved                                                   |
| Tb927.3.1180 | 35  | 36  | 7   | hypothetical protein, conserved                                                   |

|              |     |     |      |                                                        |
|--------------|-----|-----|------|--------------------------------------------------------|
| Tb927.3.1380 | 13  | 33  | 174  | ATP synthase beta chain, mitochondrial precursor       |
| Tb927.3.1410 | 94  | 80  | 65   | cytochrome oxidase subunit VII                         |
| Tb927.3.1590 | 448 | 470 | 635  | hypothetical protein, conserved                        |
| Tb927.3.1690 | 38  | 17  | 33   | hypothetical protein, conserved                        |
| Tb927.3.1710 | 9   | 14  | 15   | hypothetical protein, conserved                        |
| Tb927.3.1720 | 14  | 2   | 3    | hypothetical protein, conserved                        |
| Tb927.3.1730 | 150 | 218 | 122  | hypothetical protein, conserved                        |
| Tb927.3.1760 | 35  | 31  | 32   | chaperone protein DNAJ, putative                       |
| Tb927.3.1790 | 10  | 21  | 15   | pyruvate dehydrogenase E1 beta subunit, putative       |
| Tb927.3.1810 | 19  | 17  | 54   | hypothetical protein, conserved                        |
| Tb927.3.1820 | 1   | 1   | 1    | hypothetical protein, conserved                        |
| Tb927.3.1890 | 84  | 113 | 552  | hypothetical protein, conserved                        |
| Tb927.3.1940 | 61  | 130 | 145  | hypothetical protein, conserved                        |
| Tb927.3.2010 | 28  | 22  | 28   | hypothetical protein, conserved                        |
| Tb927.3.2080 | 98  | 36  | 176  | hypothetical protein, conserved                        |
| Tb927.3.2130 | 26  | 17  | 19   | hypothetical protein, conserved                        |
| Tb927.3.2180 | 78  | 46  | 252  | hypothetical protein, conserved                        |
| Tb927.3.2230 | 33  | 22  | 110  | succinyl-CoA synthetase alpha subunit, putative        |
| Tb927.3.2260 | 36  | 31  | 29   | hypothetical protein, conserved                        |
| Tb927.3.2300 | 20  | 17  | 15   | hypothetical protein, conserved                        |
| Tb927.3.2370 | 265 | 411 | 254  | hypothetical protein, conserved                        |
| Tb927.3.2390 | 4   | 11  | 143  | hypothetical protein, conserved                        |
| Tb927.3.2630 | 6   | 4   | 13   | hypothetical protein, conserved                        |
| Tb927.3.2670 | 18  | 19  | 77   | hypothetical protein, conserved                        |
| Tb927.3.2860 | 17  | 18  | 19   | hypothetical protein, conserved                        |
| Tb927.3.2880 | 325 | 673 | 1436 | hypothetical protein, conserved                        |
| Tb927.3.2920 | 1   | 2   | 0    | hypothetical protein, conserved                        |
| Tb927.3.2970 | 11  | 14  | 64   | hypothetical protein, conserved                        |
| Tb927.3.2980 | 16  | 27  | 18   | mitochondrial carrier protein, putative                |
| Tb927.3.3050 | 7   | 3   | 1    | hypothetical protein, conserved                        |
| Tb927.3.3330 | 83  | 92  | 345  | heat shock protein 20, putative                        |
| Tb927.3.3620 | 66  | 62  | 39   | hypothetical protein, conserved                        |
| Tb927.3.3660 | 64  | 94  | 32   | hypothetical protein, conserved                        |
| Tb927.3.3680 | 3   | 1   | 0    | hypothetical protein, conserved                        |
| Tb927.3.3890 | 28  | 63  | 101  | hypothetical protein, conserved                        |
| Tb927.3.3990 | 0   | 0   | 1    | RNA-editing complex protein; KREPB6                    |
| Tb927.3.4030 | 25  | 41  | 84   | hypothetical protein, conserved                        |
| Tb927.3.4130 | 15  | 20  | 67   | hypothetical protein, conserved                        |
| Tb927.3.4140 | 19  | 20  | 7    | hypothetical protein, conserved                        |
| Tb927.3.4210 | 2   | 2   | 1    | hypothetical protein, conserved                        |
| Tb927.3.4260 | 92  | 80  | 38   | hypothetical protein, conserved                        |
| Tb927.3.4420 | 25  | 24  | 12   | hypothetical protein, conserved                        |
| Tb927.3.4530 | 41  | 54  | 9    | hypothetical protein, conserved                        |
| Tb927.3.4700 | 31  | 34  | 20   | hypothetical protein, conserved                        |
| Tb927.3.4740 | 106 | 112 | 36   | hypothetical protein, conserved                        |
| Tb927.3.4780 | 96  | 100 | 35   | hypothetical protein, conserved                        |
| Tb927.3.4890 | 18  | 22  | 18   | ubiquinone biosynthesis protein COQ7 homolog, putative |
| Tb927.3.4920 | 19  | 70  | 37   | hypothetical protein, conserved                        |

|              |     |     |     |                                                                                            |
|--------------|-----|-----|-----|--------------------------------------------------------------------------------------------|
| Tb927.3.4950 | 120 | 93  | 85  | hypothetical protein, conserved                                                            |
| Tb927.3.5000 | 7   | 4   | 6   | hypothetical protein, conserved                                                            |
| Tb927.3.5240 | 36  | 37  | 26  | hypothetical protein, conserved                                                            |
| Tb927.3.5360 | 83  | 107 | 73  | hypothetical protein, conserved                                                            |
| Tb927.3.5600 | 19  | 22  | 28  | hypothetical protein, conserved                                                            |
| Tb927.3.5610 | 77  | 100 | 89  | ribosomal protein L3 mitochondrial, putative                                               |
| Tb927.3.5630 | 4   | 2   | 1   | 3,2-trans-enoyl-CoA isomerase, mitochondrial precursor, putative                           |
| Tb927.4.330  | 8   | 11  | 18  | hypothetical protein, conserved                                                            |
| Tb927.4.340  | 8   | 2   | 9   | hypothetical protein, conserved                                                            |
| Tb927.4.440  | 53  | 95  | 47  | hypothetical protein, conserved                                                            |
| Tb927.4.480  | 5   | 2   | 3   | hypothetical protein, conserved                                                            |
| Tb927.4.600  | 67  | 124 | 50  | hypothetical protein, conserved                                                            |
| Tb927.4.630  | 12  | 11  | 11  | hypothetical protein, conserved                                                            |
| Tb927.4.650  | 12  | 14  | 7   | chaperone protein DNAJ, putative                                                           |
| Tb927.4.700  | 2   | 4   | 5   | hypothetical protein, conserved                                                            |
| Tb927.4.720  | 69  | 135 | 142 | hypothetical protein, conserved                                                            |
| Tb927.4.830  | 16  | 21  | 219 | hypothetical protein, conserved                                                            |
| Tb927.4.940  | 44  | 49  | 81  | hypothetical protein, conserved                                                            |
| Tb927.4.950  | 17  | 23  | 32  | hypothetical protein, conserved                                                            |
| Tb927.4.1070 | 17  | 14  | 30  | 50S ribosomal protein L13, putative                                                        |
| Tb927.4.1130 | 18  | 14  | 5   | hypothetical protein, conserved                                                            |
| Tb927.4.1260 | 33  | 47  | 8   | hypothetical protein, conserved                                                            |
| Tb927.4.1440 | 11  | 18  | 22  | hypothetical protein, conserved                                                            |
| Tb927.4.1470 | 19  | 32  | 26  | hypothetical protein, conserved                                                            |
| Tb927.4.1500 | 6   | 6   | 15  | hypothetical protein, conserved                                                            |
| Tb927.4.1540 | 40  | 51  | 89  | hypothetical protein, conserved                                                            |
| Tb927.4.1660 | 54  | 80  | 92  | mitochondrial carrier protein, putative                                                    |
| Tb927.4.1750 | 6   | 3   | 17  | hypothetical protein, conserved                                                            |
| Tb927.4.1760 | 12  | 17  | 15  | hypothetical protein, conserved                                                            |
| Tb927.4.1810 | 47  | 50  | 87  | hypothetical protein, conserved                                                            |
| Tb927.4.2150 | 13  | 6   | 10  | hypothetical protein, conserved                                                            |
| Tb927.4.2250 | 1   | 3   | 8   | hypothetical protein, conserved                                                            |
| Tb927.4.2260 | 28  | 15  | 38  | centrin, putative                                                                          |
| Tb927.4.2310 | 18  | 22  | 82  | asparaginyl-tRNA synthetase, putative                                                      |
| Tb927.4.2360 | 55  | 89  | 55  | hypothetical protein, conserved                                                            |
| Tb927.4.2440 | 51  | 80  | 31  | hypothetical protein, conserved                                                            |
| Tb927.4.2480 | 8   | 9   | 12  | 8-oxoguanine DNA glycosylase, putative                                                     |
| Tb927.4.2550 | 42  | 49  | 85  | hypothetical protein, conserved                                                            |
| Tb927.4.2560 | 0   | 2   | 0   | cardiolipin synthetase, putative                                                           |
| Tb927.4.2580 | 28  | 42  | 15  | hypothetical protein, conserved                                                            |
| Tb927.4.2700 | 0   | 0   | 0   | hydroxymethylglutaryl-CoA lyase, putative; 3-hydroxy-3-methylglutarate-CoA lyase, putative |
| Tb927.4.2720 | 3   | 3   | 3   | hypothetical protein, conserved                                                            |
| Tb927.4.2790 | 35  | 59  | 31  | hypothetical protein, conserved                                                            |
| Tb927.4.2900 | 10  | 12  | 3   | hypothetical protein, conserved                                                            |
| Tb927.4.2910 | 154 | 107 | 36  | hypothetical protein, conserved                                                            |
| Tb927.4.2940 | 64  | 110 | 26  | hypothetical protein, conserved                                                            |
| Tb927.4.3010 | 397 | 439 | 99  | hypothetical protein, conserved                                                            |
| Tb927.4.3040 | 7   | 6   | 0   | hypothetical protein, conserved                                                            |

|                |     |     |     |                                                                  |
|----------------|-----|-----|-----|------------------------------------------------------------------|
| Tb927.4.3070   | 162 | 75  | 29  | hypothetical protein, conserved                                  |
| Tb927.4.3080   | 25  | 36  | 15  | hypothetical protein, conserved                                  |
| Tb927.4.3150   | 8   | 8   | 9   | hypothetical protein, conserved                                  |
| Tb927.4.3300   | 20  | 14  | 26  | mitochondrial ATP-dependent zinc metallopeptidase, putative      |
| Tb927.4.3390   | 25  | 15  | 22  | tuzin, putative                                                  |
| Tb927.4.3450   | 210 | 277 | 167 | hypothetical protein, conserved                                  |
| Tb927.4.3660   | 20  | 15  | 44  | hypothetical protein, conserved                                  |
| Tb927.4.3680   | 35  | 37  | 126 | protein phosphatase 2C, putative                                 |
| Tb927.4.3690   | 10  | 8   | 29  | hypothetical protein, conserved                                  |
| Tb927.4.3960   | 56  | 51  | 17  | hypothetical protein, conserved                                  |
| Tb927.4.4140   | 3   | 1   | 6   | hypothetical protein, conserved                                  |
| Tb927.4.4150   | 2   | 3   | 5   | hypothetical protein, conserved                                  |
| Tb927.4.4160   | 35  | 2   | 56  | hypothetical protein, conserved                                  |
| Tb927.4.4300   | 131 | 163 | 44  | hypothetical protein, conserved                                  |
| Tb927.4.4600   | 6   | 1   | 3   | hypothetical protein, conserved                                  |
| Tb927.4.4610   | 70  | 47  | 20  | hypothetical protein, conserved                                  |
| Tb927.4.4620   | 24  | 18  | 395 | cytochrome oxidase subunit VIII                                  |
| Tb927.4.4680   | 0   | 0   | 0   | hypothetical protein, conserved                                  |
| Tb927.4.4910   | 373 | 350 | 330 | 3,2-trans-enoyl-CoA isomerase, mitochondrial precursor, putative |
| Tb927.4.4980   | 86  | 122 | 69  | adrenodoxin precursor, putative                                  |
| Tb04.24M18.150 | 0   | 0   | 0   | hypothetical protein, conserved                                  |
| Tb927.5.450    | 34  | 39  | 231 | NADH-ubiquinone oxidoreductase, mitochondrial, putative          |
| Tb927.5.500    | 76  | 51  | 37  | hypothetical protein, conserved                                  |
| Tb927.5.510    | 10  | 22  | 51  | hypothetical protein, conserved                                  |
| Tb927.5.530    | 0   | 1   | 0   | hypothetical protein, conserved                                  |
| Tb927.5.560    | 8   | 9   | 25  | hypothetical protein, conserved                                  |
| Tb927.5.680    | 148 | 151 | 36  | hypothetical protein, conserved                                  |
| Tb927.5.740    | 21  | 22  | 37  | hypothetical protein, conserved                                  |
| Tb927.5.1030   | 11  | 15  | 16  | hypothetical protein, conserved                                  |
| Tb927.5.1060   | 19  | 25  | 136 | mitochondrial processing peptidase, beta subunit, putative       |
| Tb927.5.1130   | 298 | 293 | 144 | hypothetical protein, conserved                                  |
| Tb927.5.1240   | 95  | 100 | 173 | hypothetical protein, conserved                                  |
| Tb927.5.1310   | 33  | 49  | 29  | protoheme IX farnesyltransferase, putative                       |
| Tb927.5.1510   | 79  | 79  | 80  | hypothetical protein, conserved                                  |
| Tb927.5.1520   | 15  | 29  | 32  | heat shock protein HslVU, ATPase subunit HslU, putative          |
| Tb927.5.1530   | 5   | 4   | 1   | hypothetical protein, conserved                                  |
| Tb927.5.1550   | 148 | 62  | 124 | mitochondrial carrier protein, putative                          |
| Tb927.5.1710   | 13  | 6   | 34  | ribonucleoprotein p18, mitochondrial precursor, putative         |
| Tb927.5.1720   | 20  | 21  | 26  | hypothetical protein, conserved                                  |
| Tb927.5.1790   | 20  | 16  | 13  | hypothetical protein, conserved                                  |
| Tb927.5.1940   | 4   | 8   | 15  | hypothetical protein, conserved                                  |
| Tb927.5.2000   | 57  | 30  | 25  | hypothetical protein                                             |
| Tb927.5.2070   | 46  | 58  | 38  | hypothetical protein, conserved                                  |
| Tb927.5.2100   | 36  | 34  | 40  | hypothetical protein, conserved                                  |
| Tb927.5.2150   | 51  | 32  | 26  | hypothetical protein, conserved                                  |
| Tb927.5.2550   | 84  | 36  | 98  | hypothetical protein, conserved                                  |
| Tb927.5.2580   | 1   | 6   | 9   | hypothetical protein, conserved                                  |
| Tb927.5.2780   | 6   | 7   | 15  | mitochondrial DNA polymerase beta                                |



|              |     |     |     |                                                        |
|--------------|-----|-----|-----|--------------------------------------------------------|
| Tb927.5.2810 | 13  | 22  | 3   | hypothetical protein, conserved                        |
| Tb927.5.2830 | 4   | 5   | 11  | hypothetical protein, conserved                        |
| Tb927.5.2930 | 100 | 132 | 138 | hypothetical protein, conserved                        |
| Tb927.5.3000 | 64  | 53  | 61  | hypothetical protein, conserved                        |
| Tb927.5.3010 | 32  | 17  | 28  | hypothetical protein, conserved                        |
| Tb927.5.3040 | 11  | 12  | 22  | hypothetical protein, conserved                        |
| Tb927.5.3060 | 1   | 1   | 1   | hypothetical protein, conserved                        |
| Tb927.5.3090 | 33  | 50  | 182 | hypothetical protein, conserved                        |
| Tb927.5.3110 | 26  | 26  | 35  | hypothetical protein, conserved                        |
| Tb927.5.3140 | 12  | 8   | 8   | hypothetical protein, conserved                        |
| Tb927.5.3300 | 155 | 198 | 255 | hypothetical protein, conserved                        |
| Tb927.5.3340 | 1   | 3   | 17  | hypothetical protein, conserved                        |
| Tb927.5.3350 | 20  | 14  | 44  | iron superoxide dismutase, putative                    |
| Tb927.5.3360 | 85  | 70  | 194 | 50S ribosomal protein L2, putative                     |
| Tb927.5.3410 | 0   | 0   | 0   | hypothetical protein, conserved                        |
| Tb927.5.3420 | 33  | 34  | 52  | hypothetical protein, conserved                        |
| Tb927.5.3440 | 49  | 46  | 26  | hypothetical protein, conserved                        |
| Tb927.5.3640 | 22  | 21  | 55  | hypothetical protein, conserved                        |
| Tb927.5.3690 | 185 | 145 | 179 | hypothetical protein, conserved                        |
| Tb927.5.3770 | 68  | 47  | 24  | hypothetical protein, conserved                        |
| Tb927.5.3870 | 7   | 17  | 23  | hypothetical protein, conserved                        |
| Tb927.5.3910 | 4   | 6   | 13  | hypothetical protein, conserved                        |
| Tb927.5.3980 | 9   | 14  | 8   | hypothetical protein, conserved                        |
| Tb927.5.4040 | 8   | 10  | 24  | hypothetical protein, conserved                        |
| Tb927.5.4070 | 26  | 13  | 15  | hypothetical protein, conserved                        |
| Tb927.5.4080 | 93  | 94  | 76  | hypothetical protein, conserved                        |
| Tb927.5.4120 | 2   | 4   | 11  | hypothetical protein, conserved                        |
| Tb927.5.4130 | 17  | 9   | 21  | hypothetical protein, conserved                        |
| Tb927.5.4330 | 6   | 7   | 34  | dihydrolipoamide branched chain transacylase, putative |
| Tb927.6.590  | 4   | 4   | 85  | hypothetical protein, conserved                        |
| Tb927.6.610  | 117 | 81  | 126 | hypothetical protein, conserved                        |
| Tb927.6.680  | 8   | 4   | 4   | hypothetical protein, conserved                        |
| Tb927.6.1200 | 73  | 46  | 46  | hypothetical protein, conserved                        |
| Tb927.6.1250 | 37  | 41  | 53  | hypothetical protein, conserved                        |
| Tb927.6.1410 | 126 | 255 | 43  | hypothetical protein, conserved                        |
| Tb927.6.1440 | 48  | 53  | 116 | hypothetical protein, conserved                        |
| Tb927.6.1510 | 19  | 32  | 61  | lysyl-tRNA synthetase, putative                        |
| Tb927.6.1590 | 7   | 33  | 3   | hypothetical protein, conserved                        |
| Tb927.6.1680 | 13  | 17  | 20  | zinc finger protein, putative                          |
| Tb927.6.1710 | 24  | 31  | 51  | hypothetical protein, conserved                        |
| Tb927.6.1840 | 100 | 106 | 65  | hypothetical protein, conserved                        |
| Tb927.6.1860 | 44  | 47  | 39  | hypothetical protein, conserved                        |
| Tb927.6.1890 | 7   | 3   | 1   | hypothetical protein, conserved                        |
| Tb927.6.2010 | 613 | 747 | 303 | hypothetical protein, conserved                        |
| Tb927.6.2070 | 91  | 117 | 94  | hypothetical protein, conserved                        |
| Tb927.6.2080 | 26  | 18  | 62  | hypothetical protein, conserved                        |
| Tb927.6.2140 | 23  | 16  | 31  | hypothetical protein, conserved                        |
| Tb927.6.2160 | 26  | 21  | 28  | hypothetical protein, conserved                        |

|              |      |      |      |                                                              |
|--------------|------|------|------|--------------------------------------------------------------|
| Tb927.6.2170 | 65   | 80   | 215  | co-chaperone GrpE, putative                                  |
| Tb927.6.2180 | 127  | 142  | 38   | hypothetical protein, conserved                              |
| Tb927.6.2230 | 60   | 56   | 108  | hypothetical protein, conserved                              |
| Tb927.6.2290 | 21   | 25   | 14   | hypothetical protein, conserved                              |
| Tb927.6.2350 | 20   | 16   | 12   | hypothetical protein, conserved                              |
| Tb927.6.2380 | 1    | 4    | 7    | hypothetical protein, conserved                              |
| Tb927.6.2420 | 1168 | 1232 | 674  | p22 protein precursor                                        |
| Tb927.6.2470 | 5    | 4    | 4    | hypothetical protein, conserved                              |
| Tb927.6.2480 | 101  | 137  | 139  | chaperone protein DNAJ, putative                             |
| Tb927.6.2490 | 20   | 4    | 40   | hypothetical protein, conserved                              |
| Tb927.6.2510 | 4    | 0    | 2    | hypothetical protein, conserved                              |
| Tb927.6.2540 | 26   | 8    | 5    | DREV methyltransferase, putative                             |
| Tb927.6.2590 | 16   | 34   | 16   | hypothetical protein, conserved                              |
| Tb927.6.2610 | 160  | 141  | 66   | hypothetical protein, conserved                              |
| Tb927.6.2630 | 3    | 1    | 3    | hypothetical protein, conserved                              |
| Tb927.6.2790 | 73   | 99   | 1032 | L-threonine 3-dehydrogenase, putative                        |
| Tb927.6.3360 | 13   | 11   | 34   | hypothetical protein, conserved                              |
| Tb927.6.3420 | 141  | 231  | 105  | hypothetical protein, conserved                              |
| Tb927.6.3600 | 9    | 5    | 15   | hypothetical protein, conserved                              |
| Tb927.6.3610 | 1    | 1    | 1    | hypothetical protein, conserved                              |
| Tb927.6.3730 | 4    | 2    | 0    | chaperone protein DNAJ, putative                             |
| Tb927.6.3740 | 3    | 2    | 17   | heat shock 70 kDa protein, mitochondrial precursor, putative |
| Tb927.6.3850 | 3    | 3    | 1    | chaperone protein DNAJ, putative                             |
| Tb927.6.3930 | 8    | 12   | 10   | hypothetical protein, conserved                              |
| Tb927.6.4030 | 17   | 6    | 13   | superoxide dismutase, putative                               |
| Tb927.6.4040 | 16   | 16   | 9    | hypothetical protein, conserved                              |
| Tb927.6.4070 | 110  | 158  | 56   | hypothetical protein, conserved                              |
| Tb927.6.4080 | 14   | 14   | 14   | hypothetical protein, conserved                              |
| Tb927.6.4130 | 220  | 84   | 575  | hypothetical protein, conserved                              |
| Tb927.6.4150 | 82   | 71   | 29   | hypothetical protein, conserved                              |
| Tb927.6.4200 | 12   | 30   | 351  | hypothetical protein, conserved                              |
| Tb927.6.4270 | 8    | 6    | 7    | hypothetical protein, conserved                              |
| Tb927.6.4400 | 7    | 7    | 9    | hypothetical protein, conserved                              |
| Tb927.6.4450 | 6    | 4    | 6    | hypothetical protein, conserved                              |
| Tb927.6.4540 | 4    | 5    | 17   | 3-hydroxy-3-methylglutaryl-CoA reductase, putative           |
| Tb927.6.4560 | 7    | 6    | 15   | hypothetical protein, conserved                              |
| Tb927.6.4580 | 10   | 11   | 4    | hypothetical protein, conserved                              |
| Tb927.6.4700 | 112  | 150  | 160  | hypothetical protein, conserved                              |
| Tb927.6.4790 | 9    | 8    | 3    | hypothetical protein, conserved                              |
| Tb927.6.4930 | 16   | 24   | 7    | hypothetical protein, conserved                              |
| Tb927.6.4990 | 62   | 83   | 325  | ATP synthase, epsilon chain, putative                        |
| Tb927.7.340  | 91   | 78   | 9    | hypothetical protein, conserved                              |
| Tb927.7.560  | 21   | 18   | 28   | hypothetical protein, conserved                              |
| Tb927.7.600  | 114  | 180  | 31   | DNA ligase, putative                                         |
| Tb927.7.610  | 8    | 1    | 19   | DNA ligase, putative                                         |
| Tb927.7.630  | 34   | 26   | 32   | hypothetical protein, conserved                              |
| Tb927.7.640  | 240  | 444  | 78   | hypothetical protein, conserved                              |
| Tb927.7.740  | 79   | 54   | 53   | chaperone protein DNAJ, putative                             |

|              |     |     |     |                                                                                    |
|--------------|-----|-----|-----|------------------------------------------------------------------------------------|
| Tb927.7.800  | 25  | 24  | 38  | hypothetical protein, conserved                                                    |
| Tb927.7.840  | 215 | 160 | 515 | hypothetical protein, conserved                                                    |
| Tb927.7.870  | 4   | 9   | 16  | hypothetical protein, conserved                                                    |
| Tb927.7.890  | 16  | 41  | 43  | electron transfer protein, putative                                                |
| Tb927.7.910  | 31  | 26  | 50  | hypothetical protein, conserved                                                    |
| Tb927.7.1000 | 47  | 29  | 9   | hypothetical protein, conserved                                                    |
| Tb927.7.1010 | 131 | 60  | 338 | hypothetical protein, conserved                                                    |
| Tb927.7.1070 | 3   | 9   | 32  | RNA-editing complex protein; exonuclease; KREX1                                    |
| Tb927.7.1080 | 39  | 37  | 20  | hypothetical protein, conserved                                                    |
| Tb927.7.1250 | 4   | 0   | 9   | hypothetical protein, conserved                                                    |
| Tb927.7.1270 | 58  | 71  | 24  | hypothetical protein, conserved                                                    |
| Tb927.7.1340 | 119 | 98  | 68  | 10 kDa heat shock protein, putative                                                |
| Tb927.7.1350 | 35  | 76  | 20  | hypothetical protein, conserved                                                    |
| Tb927.7.1370 | 18  | 9   | 0   | spliced leader RNA PSE-promoter transcription factor, putative                     |
| Tb927.7.1440 | 46  | 44  | 137 | DNA polymerase sigma-like protein                                                  |
| Tb927.7.1490 | 82  | 82  | 47  | hypothetical protein, conserved                                                    |
| Tb927.7.1550 | 14  | 21  | 32  | RNA-editing complex protein; RNA-editing 3' terminal uridylyl transferase 2; KRET2 |
| Tb927.7.1640 | 28  | 31  | 34  | GTP-binding protein, putative                                                      |
| Tb927.7.1720 | 23  | 29  | 75  | HIRA-interacting protein 5, putative                                               |
| Tb927.7.1900 | 0   | 1   | 0   | protein kinase, putative                                                           |
| Tb927.7.1910 | 18  | 43  | 21  | glycine dehydrogenase, putative                                                    |
| Tb927.7.2090 | 7   | 4   | 0   | hypothetical protein, conserved                                                    |
| Tb927.7.2200 | 81  | 112 | 409 | hypothetical protein, conserved                                                    |
| Tb927.7.2210 | 29  | 55  | 63  | hypothetical protein, conserved                                                    |
| Tb927.7.2220 | 13  | 4   | 9   | hypothetical protein, conserved                                                    |
| Tb927.7.2280 | 26  | 12  | 13  | hypothetical protein, conserved                                                    |
| Tb927.7.2390 | 40  | 42  | 49  | hypothetical protein, conserved                                                    |
| Tb927.7.2410 | 53  | 46  | 81  | hypothetical protein, conserved                                                    |
| Tb927.7.2490 | 27  | 13  | 31  | hypothetical protein, conserved                                                    |
| Tb927.7.2560 | 12  | 19  | 10  | hypothetical protein, conserved                                                    |
| Tb927.7.2570 | 15  | 26  | 20  | hypothetical protein, conserved                                                    |
| Tb927.7.2620 | 6   | 6   | 2   | hypothetical protein, conserved                                                    |
| Tb927.7.2690 | 151 | 251 | 122 | hypothetical protein, conserved                                                    |
| Tb927.7.2700 | 21  | 9   | 79  | NADH-cytochrome b5 reductase, putative                                             |
| Tb927.7.2760 | 33  | 48  | 86  | hypothetical protein, conserved                                                    |
| Tb927.7.2960 | 30  | 20  | 28  | hypothetical protein, conserved                                                    |
| Tb927.7.2990 | 28  | 19  | 33  | hypothetical protein, conserved                                                    |
| Tb927.7.3050 | 24  | 32  | 90  | hypothetical protein, conserved                                                    |
| Tb927.7.3100 | 36  | 45  | 82  | hypothetical protein, conserved                                                    |
| Tb927.7.3240 | 131 | 235 | 61  | hypothetical protein, conserved                                                    |
| Tb927.7.3270 | 10  | 8   | 20  | hypothetical protein, conserved                                                    |
| Tb927.7.3460 | 15  | 9   | 9   | hypothetical protein, conserved                                                    |
| Tb927.7.3470 | 27  | 44  | 5   | p22 protein precursor, putative                                                    |
| Tb927.7.3510 | 3   | 1   | 4   | hypothetical protein, conserved                                                    |
| Tb927.7.3520 | 4   | 3   | 4   | hypothetical protein, conserved                                                    |
| Tb927.7.3590 | 31  | 11  | 32  | hypothetical protein, conserved                                                    |
| Tb927.7.3750 | 13  | 11  | 29  | TFIIF-stimulated CTD phosphatase, putative                                         |
| Tb927.7.3770 | 23  | 13  | 12  | hypothetical protein, conserved                                                    |

|              |     |     |     |                                                                                                                                               |
|--------------|-----|-----|-----|-----------------------------------------------------------------------------------------------------------------------------------------------|
| Tb927.7.3800 | 2   | 1   | 3   | hypothetical protein, conserved                                                                                                               |
| Tb927.7.3810 | 259 | 173 | 449 | hypothetical protein, conserved                                                                                                               |
| Tb927.7.3910 | 10  | 9   | 41  | hypothetical protein, conserved                                                                                                               |
| Tb927.7.3940 | 128 | 178 | 611 | mitochondrial carrier protein, putative; ADP/ATP mitochondrial translocase, putative; adenine nucleotide mitochondrial translocator, putative |
| Tb927.7.3950 | 12  | 12  | 14  | RNA-editing complex protein; RNA-editing 3' terminal uridylyl transferase 1; KRET1                                                            |
| Tb927.7.3960 | 51  | 54  | 61  | 50S ribosomal protein L16, putative                                                                                                           |
| Tb927.7.3970 | 257 | 134 | 57  | hypothetical protein, conserved                                                                                                               |
| Tb927.7.3990 | 9   | 9   | 9   | mitochondrial DNA polymerase I protein C                                                                                                      |
| Tb927.7.4050 | 24  | 36  | 24  | hypothetical protein, conserved                                                                                                               |
| Tb927.7.4140 | 84  | 90  | 46  | hypothetical protein, conserved                                                                                                               |
| Tb927.7.4200 | 20  | 29  | 72  | hypothetical protein, conserved                                                                                                               |
| Tb927.7.4210 | 8   | 13  | 8   | hypothetical protein, conserved                                                                                                               |
| Tb927.7.4430 | 69  | 49  | 50  | hypothetical protein, conserved                                                                                                               |
| Tb927.7.4440 | 4   | 3   | 11  | hypothetical protein, conserved                                                                                                               |
| Tb927.7.4710 | 20  | 16  | 20  | hypothetical protein, conserved                                                                                                               |
| Tb927.7.4940 | 129 | 94  | 117 | oligopeptidase B protein, putative; serine peptidase, clan SC, family S9A-like protein                                                        |
| Tb927.7.5110 | 8   | 11  | 17  | hypothetical protein, conserved                                                                                                               |
| Tb927.7.5120 | 34  | 17  | 22  | hypothetical protein, conserved                                                                                                               |
| Tb927.7.5130 | 80  | 72  | 84  | hypothetical protein, conserved                                                                                                               |
| Tb927.7.5260 | 31  | 50  | 31  | hypothetical protein, conserved                                                                                                               |
| Tb927.7.5280 | 48  | 26  | 56  | hypothetical protein, conserved                                                                                                               |
| Tb927.7.5440 | 43  | 51  | 94  | hypothetical protein, conserved                                                                                                               |
| Tb927.7.5510 | 15  | 11  | 0   | hypothetical protein, conserved                                                                                                               |
| Tb927.7.5550 | 71  | 119 | 29  | hypothetical protein, conserved                                                                                                               |
| Tb927.7.5720 | 13  | 13  | 29  | hypothetical protein, conserved                                                                                                               |
| Tb927.7.5820 | 12  | 11  | 63  | monooxygenase, putative                                                                                                                       |
| Tb927.7.6100 | 66  | 22  | 3   | hypothetical protein                                                                                                                          |
| Tb927.7.6200 | 7   | 3   | 9   | chaperone protein DNAJ, putative                                                                                                              |
| Tb927.7.6350 | 25  | 19  | 14  | NADH-ubiquinone oxidoreductase, mitochondrial, putative                                                                                       |
| Tb927.7.6410 | 92  | 119 | 92  | hypothetical protein, conserved                                                                                                               |
| Tb927.7.6660 | 1   | 1   | 1   | chaperone protein DNAJ, putative                                                                                                              |
| Tb927.7.6800 | 55  | 62  | 26  | hypothetical protein, conserved                                                                                                               |
| Tb927.7.6940 | 14  | 7   | 5   | glutaminyl cyclase, putative                                                                                                                  |
| Tb927.7.6990 | 346 | 679 | 447 | hypothetical protein, conserved                                                                                                               |
| Tb927.7.7010 | 18  | 30  | 4   | hypothetical protein, conserved                                                                                                               |
| Tb927.7.7080 | 303 | 306 | 111 | mitochondrial glycoprotein-like protein                                                                                                       |
| Tb927.7.7090 | 3   | 2   | 9   | hypothetical protein, conserved                                                                                                               |
| Tb927.7.7230 | 28  | 13  | 10  | nitroreductase, putative                                                                                                                      |
| Tb927.7.7330 | 13  | 14  | 25  | hypothetical protein, conserved                                                                                                               |
| Tb927.7.7360 | 0   | 0   | 0   | cell division control protein 2 homolog 2                                                                                                     |
| Tb927.7.7410 | 41  | 48  | 3   | oxidoreductase, putative                                                                                                                      |
| Tb927.7.7420 | 24  | 59  | 135 | ATP synthase alpha chain, mitochondrial precursor                                                                                             |
| Tb927.7.7440 | 11  | 6   | 25  | hypothetical protein, conserved                                                                                                               |
| Tb927.8.580  | 5   | 3   | 3   | hypothetical protein, conserved                                                                                                               |
| Tb927.8.620  | 229 | 228 | 86  | RNA-editing complex protein MP42                                                                                                              |

|              |     |     |     |                                                                    |
|--------------|-----|-----|-----|--------------------------------------------------------------------|
| Tb927.8.630  | 20  | 24  | 60  | lipoate-protein ligase, putative                                   |
| Tb927.8.680  | 20  | 27  | 20  | RNA-editing complex protein                                        |
| Tb927.8.1010 | 10  | 22  | 16  | chaperone protein DNAJ, putative                                   |
| Tb927.8.1030 | 120 | 109 | 46  | chaperone protein DNAJ, putative                                   |
| Tb927.8.1060 | 41  | 51  | 6   | malonyl-CoA decarboxylase, mitochondrial precursor, putative       |
| Tb927.8.1240 | 10  | 12  | 9   | electron transfer flavoprotein-ubiquinone oxidoreductase, putative |
| Tb927.8.1420 | 19  | 8   | 17  | acyl-CoA dehydrogenase, mitochondrial precursor, putative          |
| Tb927.8.1430 | 2   | 2   | 7   | hypothetical protein, conserved                                    |
| Tb927.8.1440 | 18  | 18  | 24  | maoC-like dehydratase, putative                                    |
| Tb927.8.1490 | 114 | 104 | 52  | hypothetical protein, conserved                                    |
| Tb927.8.1700 | 277 | 165 | 44  | hypothetical protein, conserved                                    |
| Tb927.8.1740 | 42  | 51  | 56  | hypothetical protein, conserved                                    |
| Tb927.8.1770 | 10  | 30  | 20  | hypothetical protein, conserved                                    |
| Tb927.8.1850 | 5   | 4   | 20  | hypothetical protein, conserved                                    |
| Tb927.8.1860 | 15  | 17  | 36  | pitrilysin-like metalloprotease                                    |
| Tb927.8.1880 | 111 | 118 | 84  | hypothetical protein, conserved                                    |
| Tb927.8.1890 | 78  | 46  | 338 | cytochrome c1, heme protein, mitochondrial precursor               |
| Tb927.8.1990 | 89  | 53  | 47  | tryparedoxin peroxidase                                            |
| Tb927.8.2110 | 44  | 18  | 61  | hypothetical protein, conserved                                    |
| Tb927.8.2170 | 25  | 12  | 21  | hypothetical protein, conserved                                    |
| Tb927.8.2180 | 17  | 16  | 4   | hypothetical protein, conserved                                    |
| Tb927.8.2190 | 21  | 10  | 29  | hypothetical protein, conserved                                    |
| Tb927.8.2240 | 4   | 6   | 1   | tryptophanyl-tRNA synthetase, putative                             |
| Tb927.8.2300 | 12  | 15  | 9   | hypothetical protein, conserved                                    |
| Tb927.8.2340 | 7   | 2   | 3   | hypothetical protein, conserved                                    |
| Tb927.8.2470 | 34  | 55  | 50  | hypothetical protein, conserved                                    |
| Tb927.8.2530 | 39  | 56  | 136 | hypothetical protein, conserved                                    |
| Tb927.8.2540 | 11  | 2   | 62  | 3-ketoacyl-CoA thiolase, putative                                  |
| Tb927.8.2650 | 15  | 19  | 26  | hypothetical protein, conserved                                    |
| Tb927.8.2670 | 23  | 21  | 44  | hypothetical protein, conserved                                    |
| Tb927.8.2700 | 265 | 249 | 50  | hypothetical protein, conserved                                    |
| Tb927.8.2740 | 50  | 71  | 263 | mitochondrial RNA binding protein                                  |
| Tb927.8.2750 | 231 | 250 | 68  | hypothetical protein, conserved                                    |
| Tb927.8.2760 | 10  | 14  | 3   | hypothetical protein, conserved                                    |
| Tb927.8.2880 | 8   | 17  | 28  | hypothetical protein, conserved                                    |
| Tb927.8.2970 | 109 | 25  | 59  | hypothetical protein, conserved                                    |
| Tb927.8.2990 | 5   | 10  | 9   | hypothetical protein, conserved                                    |
| Tb927.8.3040 | 229 | 188 | 65  | hypothetical protein, conserved                                    |
| Tb927.8.3070 | 20  | 16  | 61  | hypothetical protein, conserved                                    |
| Tb927.8.3090 | 2   | 1   | 3   | hypothetical protein, conserved                                    |
| Tb927.8.3110 | 101 | 49  | 183 | hypothetical protein, conserved                                    |
| Tb927.8.3130 | 6   | 9   | 4   | S-adenosyl-methyltransferase mraW-like protein, putative           |
| Tb927.8.3160 | 24  | 8   | 23  | hypothetical protein, conserved                                    |
| Tb927.8.3170 | 183 | 206 | 76  | hypothetical protein, conserved                                    |
| Tb927.8.3230 | 4   | 11  | 20  | hypothetical protein, conserved                                    |
| Tb927.8.3300 | 67  | 156 | 10  | hypothetical protein, conserved                                    |
| Tb927.8.3320 | 77  | 130 | 24  | hypothetical protein, conserved                                    |
| Tb927.8.3330 | 55  | 122 | 27  | mitochondrial carrier protein, putative                            |

|              |      |       |      |                                                                    |
|--------------|------|-------|------|--------------------------------------------------------------------|
| Tb927.8.3560 | 41   | 29    | 117  | DNA repair and recombination helicase protein PIF1, putative       |
| Tb927.8.3580 | 9    | 10    | 13   | ATP-dependent chaperone, putative                                  |
| Tb927.8.3690 | 8    | 12    | 48   | isocitrate dehydrogenase [NADP], mitochondrial precursor, putative |
| Tb927.8.3740 | 19   | 6     | 9    | hypothetical protein, conserved                                    |
| Tb927.8.3810 | 48   | 54    | 39   | hypothetical protein, conserved                                    |
| Tb927.8.3830 | 9    | 6     | 15   | ATP-dependent DEAD/H RNA helicase, putative                        |
| Tb927.8.3960 | 1    | 2     | 6    | hypothetical protein, conserved                                    |
| Tb927.8.4000 | 119  | 125   | 69   | hypothetical protein, conserved                                    |
| Tb927.8.4040 | 4    | 4     | 1    | endonuclease G, putative                                           |
| Tb927.8.4150 | 4    | 8     | 17   | hypothetical protein, conserved                                    |
| Tb927.8.4240 | 2    | 5     | 14   | hypothetical protein, conserved                                    |
| Tb927.8.4250 | 45   | 56    | 21   | hypothetical protein, conserved                                    |
| Tb927.8.4380 | 166  | 113   | 277  | hypothetical protein, conserved                                    |
| Tb927.8.4440 | 12   | 13    | 3    | mitochondrial carrier protein, putative                            |
| Tb927.8.4470 | 31   | 39    | 16   | chaperone protein DNAJ, putative                                   |
| Tb927.8.4550 | 52   | 78    | 72   | hypothetical protein, conserved                                    |
| Tb927.8.4810 | 40   | 34    | 45   | prohibitin                                                         |
| Tb927.8.4860 | 78   | 65    | 141  | hypothetical protein, conserved                                    |
| Tb927.8.4920 | 390  | 302   | 232  | hypothetical protein, conserved                                    |
| Tb927.8.4930 | 210  | 216   | 44   | hypothetical protein, conserved                                    |
| Tb927.8.4960 | 28   | 48    | 64   | hypothetical protein, conserved                                    |
| Tb927.8.5100 | 80   | 57    | 43   | hypothetical protein, conserved                                    |
| Tb927.8.5120 | 1    | 2     | 1    | cytochrome c                                                       |
| Tb927.8.5130 | 4    | 4     | 2    | hypothetical protein, conserved                                    |
| Tb927.8.5200 | 282  | 311   | 172  | hypothetical protein, conserved                                    |
| Tb927.8.5220 | 3    | 5     | 4    | hypothetical protein, conserved                                    |
| Tb927.8.5280 | 109  | 97    | 51   | hypothetical protein, conserved                                    |
| Tb927.8.5420 | 34   | 39    | 34   | hypothetical protein, conserved                                    |
| Tb927.8.5480 | 227  | 236   | 130  | hypothetical protein, conserved                                    |
| Tb927.8.5540 | 55   | 25    | 32   | hypothetical protein, conserved                                    |
| Tb927.8.5560 | 74   | 51    | 24   | hypothetical protein, conserved                                    |
| Tb927.8.5640 | 9    | 13    | 27   | hypothetical protein, conserved                                    |
| Tb927.8.5660 | 9    | 6     | 15   | hypothetical protein, conserved                                    |
| Tb927.8.5690 | 64   | 12    | 32   | hypothetical protein, conserved                                    |
| Tb927.8.5790 | 0    | 0     | 0    | hypothetical protein                                               |
| Tb927.8.5810 | 30   | 31    | 8    | mitochondrial carrier protein, putative                            |
| Tb927.8.5860 | 60   | 38    | 67   | 50S ribosomal protein L17, putative                                |
| Tb927.8.6040 | 8428 | 11155 | 9191 | hypothetical protein, conserved                                    |
| Tb927.8.6060 | 47   | 96    | 434  | 2-amino-3-ketobutyrate coenzyme A ligase, putative                 |
| Tb927.8.6080 | 17   | 21    | 103  | hypothetical protein, conserved                                    |
| Tb927.8.6110 | 14   | 14    | 38   | hypothetical protein, conserved                                    |
| Tb927.8.6400 | 12   | 9     | 19   | hypothetical protein, conserved                                    |
| Tb927.8.6410 | 88   | 191   | 112  | short-chain dehydrogenase, putative                                |
| Tb927.8.6560 | 460  | 621   | 96   | hypothetical protein, conserved                                    |
| Tb927.8.6580 | 120  | 279   | 297  | succinate dehydrogenase flavoprotein, putative                     |
| Tb927.8.6620 | 352  | 245   | 59   | hypothetical protein, conserved                                    |
| Tb927.8.6640 | 47   | 54    | 49   | hypothetical protein, conserved                                    |
| Tb927.8.6800 | 64   | 57    | 126  | hypothetical protein, conserved                                    |

|               |     |     |     |                                                                                                 |
|---------------|-----|-----|-----|-------------------------------------------------------------------------------------------------|
| Tb927.8.6820  | 23  | 10  | 42  | hypothetical protein, conserved                                                                 |
| Tb927.8.6890  | 0   | 0   | 0   | hypothetical protein, conserved                                                                 |
| Tb927.8.6960  | 26  | 24  | 19  | hypothetical protein, conserved                                                                 |
| Tb927.8.6970  | 35  | 17  | 21  | 3-methylcrotonyl-CoA carboxylase alpha subunit, putative                                        |
| Tb927.8.7040  | 30  | 14  | 22  | hypothetical protein, conserved                                                                 |
| Tb927.8.7170  | 1   | 4   | 16  | inositol polyphosphate 1-phosphatase, putative                                                  |
| Tb927.8.7260  | 216 | 340 | 122 | kinetoplast-associated protein, putative                                                        |
| Tb927.8.7290  | 4   | 7   | 20  | hypothetical protein, conserved                                                                 |
| Tb927.8.7380  | 45  | 9   | 50  | dihydrolipoamide dehydrogenase, point mutation                                                  |
| Tb927.8.7530  | 120 | 172 | 287 | 3,2-trans-enoyl-CoA isomerase, mitochondrial precursor, putative                                |
| Tb927.8.7770  | 120 | 101 | 32  | hypothetical protein, conserved                                                                 |
| Tb927.8.8170  | 261 | 329 | 108 | hypothetical protein, conserved                                                                 |
| Tb927.8.8180  | 6   | 4   | 4   | hypothetical protein, conserved                                                                 |
| Tb927.8.8190  | 9   | 1   | 9   | hypothetical protein, conserved                                                                 |
| Tb927.8.8360  | 17  | 14  | 56  | receptor-type adenylate cyclase GRESAG 4, putative                                              |
| Tb09.160.0360 | 15  | 14  | 91  | hypothetical protein, conserved                                                                 |
| Tb09.160.0370 | 7   | 9   | 33  | hypothetical protein, conserved                                                                 |
| Tb09.160.0410 | 177 | 215 | 61  | hypothetical protein, conserved                                                                 |
| Tb09.160.0470 | 7   | 2   | 3   | hypothetical protein, conserved                                                                 |
| Tb09.160.0540 | 6   | 3   | 3   | hypothetical protein, conserved                                                                 |
| Tb09.160.0550 | 15  | 37  | 55  | hypothetical protein, conserved                                                                 |
| Tb09.160.0760 | 8   | 7   | 10  | hypothetical protein, conserved                                                                 |
| Tb09.160.0890 | 132 | 139 | 31  | hypothetical protein, conserved                                                                 |
| Tb09.160.1020 | 42  | 33  | 35  | hypothetical protein, conserved                                                                 |
| Tb09.160.1280 | 14  | 12  | 12  | hypothetical protein, conserved                                                                 |
| Tb09.160.1370 | 1   | 2   | 1   | hypothetical protein, conserved                                                                 |
| Tb09.160.1760 | 46  | 34  | 59  | hypothetical protein, conserved                                                                 |
| Tb09.160.1820 | 6   | 4   | 213 | cytochrome oxidase subunit V                                                                    |
| Tb09.160.2000 | 3   | 2   | 10  | pseudouridylate synthase, putative                                                              |
| Tb09.160.2060 | 3   | 1   | 9   | hypothetical protein, conserved                                                                 |
| Tb09.160.2100 | 6   | 9   | 9   | low molecular weight protein tyrosine phosphatase, putative                                     |
| Tb09.160.2160 | 30  | 39  | 67  | hypothetical protein, conserved                                                                 |
| Tb09.160.2210 | 137 | 240 | 127 | glutaredoxin-like protein                                                                       |
| Tb09.160.2220 | 73  | 51  | 32  | hypothetical protein, conserved                                                                 |
| Tb09.160.2250 | 58  | 84  | 50  | hypothetical protein, conserved                                                                 |
| Tb09.160.2280 | 198 | 125 | 57  | hypothetical protein, conserved                                                                 |
| Tb09.160.2380 | 142 | 143 | 94  | hypothetical protein, conserved                                                                 |
| Tb09.160.2970 | 18  | 35  | 21  | mitochondrial RNA editing ligase 1; RNA-editing complex protein; RNA editing ligase; KREL1      |
| Tb09.160.3050 | 36  | 41  | 25  | hypothetical protein, conserved                                                                 |
| Tb09.160.3110 | 37  | 40  | 39  | mitochondrial processing peptide beta subunit, putative; metallo-peptidase, Clan ME, Family M16 |
| Tb09.160.3370 | 26  | 30  | 20  | hypothetical protein, conserved                                                                 |
| Tb09.160.3800 | 372 | 240 | 217 | hypothetical protein, conserved                                                                 |
| Tb09.160.3880 | 0   | 0   | 0   | hypothetical protein, conserved                                                                 |
| Tb09.160.4090 | 236 | 209 | 109 | DNA topoisomerase II                                                                            |
| Tb09.160.4130 | 12  | 18  | 60  | RNA-editing complex protein; KREPB7                                                             |
| Tb09.160.4150 | 369 | 389 | 923 | hypothetical protein, conserved                                                                 |
| Tb09.160.4300 | 25  | 47  | 134 | farnesyl pyrophosphate synthetase, putative                                                     |

|               |     |     |     |                                                                                        |
|---------------|-----|-----|-----|----------------------------------------------------------------------------------------|
| Tb09.160.4310 | 101 | 67  | 75  | glutamate dehydrogenase                                                                |
| Tb09.160.4380 | 24  | 7   | 180 | succinate dehydrogenase, putative                                                      |
| Tb09.160.4440 | 28  | 18  | 41  | hypothetical protein, conserved                                                        |
| Tb09.160.4460 | 76  | 126 | 72  | TFIIF-stimulated CTD phosphatase, putative                                             |
| Tb09.160.4480 | 72  | 117 | 71  | TFIIF-stimulated CTD phosphatase, putative                                             |
| Tb09.160.4660 | 175 | 174 | 67  | hypothetical protein, conserved                                                        |
| Tb09.160.4670 | 30  | 26  | 11  | hypothetical protein, conserved                                                        |
| Tb09.160.4750 | 20  | 34  | 32  | hypothetical protein, conserved                                                        |
| Tb09.160.4840 | 150 | 159 | 43  | hypothetical protein, conserved                                                        |
| Tb09.160.4900 | 2   | 7   | 2   | hypothetical protein, unlikely                                                         |
| Tb09.160.4910 | 91  | 75  | 26  | flavoprotein monooxygenase, putative                                                   |
| Tb09.160.5000 | 0   | 0   | 0   | hypothetical protein, unlikely                                                         |
| Tb09.160.5050 | 38  | 36  | 16  | hypothetical protein, conserved                                                        |
| Tb09.v1.0280  | 0   | 0   | 0   | hypothetical protein, unlikely                                                         |
| Tb09.160.5110 | 33  | 16  | 45  | hypothetical protein, conserved                                                        |
| Tb09.160.5240 | 54  | 72  | 25  | hypothetical protein, conserved                                                        |
| Tb09.160.5260 | 15  | 14  | 52  | oxidoreductase, putative                                                               |
| Tb09.160.5270 | 25  | 16  | 21  | hypothetical protein, conserved                                                        |
| Tb09.160.5280 | 11  | 11  | 9   | mitochondrial exoribonuclease DSS; exoribonuclease DSS (EMBL:AY233297)                 |
| Tb09.160.5320 | 44  | 32  | 33  | hypothetical protein, conserved                                                        |
| Tb09.v1.0420  | 10  | 14  | 38  | hypothetical protein, conserved                                                        |
| Tb09.211.0040 | 28  | 44  | 61  | hypothetical protein, conserved                                                        |
| Tb09.211.0070 | 71  | 110 | 4   | hypothetical protein, conserved                                                        |
| Tb09.211.0190 | 9   | 11  | 13  | metalloprotease-like protein; peptide deformylase, putative                            |
| Tb09.211.0220 | 29  | 14  | 129 | rhomboid-like protein; serine peptidase, Clan S- , family S54, putative                |
| Tb09.211.0230 | 52  | 33  | 11  | hypothetical protein, conserved                                                        |
| Tb09.211.0330 | 34  | 30  | 85  | chaperone protein DNAJ, putative                                                       |
| Tb09.211.0510 | 2   | 4   | 12  | cytochrome c oxidase assembly factor, putative                                         |
| Tb09.211.0530 | 35  | 32  | 108 | hypothetical protein, conserved                                                        |
| Tb09.211.0760 | 9   | 7   | 10  | hypothetical protein, conserved                                                        |
| Tb09.211.0950 | 63  | 67  | 50  | hypothetical protein, conserved                                                        |
| Tb09.211.1240 | 103 | 228 | 157 | hypothetical protein, conserved                                                        |
| Tb09.211.1280 | 250 | 189 | 65  | hypothetical protein, conserved                                                        |
| Tb09.211.1320 | 13  | 10  | 10  | AMP deaminase, putative                                                                |
| Tb09.211.1380 | 118 | 26  | 64  | glycine cleavage system H protein, putative                                            |
| Tb09.211.1600 | 12  | 11  | 21  | hypothetical protein, conserved                                                        |
| Tb09.211.1610 | 10  | 12  | 3   | phosphatidylserine decarboxylase, putative                                             |
| Tb09.211.1750 | 217 | 279 | 950 | mitochondrial carrier protein, putative; mitochondrial phosphate transporter, putative |
| Tb09.211.1880 | 24  | 6   | 8   | hypothetical protein, conserved                                                        |
| Tb09.211.1900 | 50  | 56  | 337 | hypothetical protein, conserved                                                        |
| Tb09.211.1940 | 2   | 5   | 10  | hypothetical protein, conserved                                                        |
| Tb09.211.1960 | 11  | 7   | 17  | 3-demethylubiquinone-9 3-methyltransferase, putative                                   |
| Tb09.211.2370 | 31  | 20  | 45  | mitochondrial carrier protein, putative                                                |
| Tb09.211.2430 | 80  | 48  | 45  | hypothetical protein, conserved                                                        |
| Tb09.211.2530 | 10  | 7   | 28  | hypothetical protein, conserved                                                        |
| Tb09.211.2580 | 95  | 102 | 65  | 30S Ribosomal protein S17, putative                                                    |



|               |      |      |      |                                                                                                                          |
|---------------|------|------|------|--------------------------------------------------------------------------------------------------------------------------|
| Tb09.211.2600 | 64   | 44   | 56   | hypothetical protein, conserved                                                                                          |
| Tb09.211.2620 | 15   | 9    | 44   | hypothetical protein, conserved                                                                                          |
| Tb09.211.2670 | 272  | 347  | 88   | hypothetical protein, conserved                                                                                          |
| Tb09.211.2780 | 19   | 14   | 6    | hypothetical protein, conserved                                                                                          |
| Tb09.211.3000 | 10   | 12   | 90   | hypothetical protein, conserved                                                                                          |
| Tb09.211.3030 | 14   | 13   | 5    | hypothetical protein, conserved                                                                                          |
| Tb09.211.3050 | 4    | 6    | 1    | hypothetical protein, conserved                                                                                          |
| Tb09.211.3080 | 15   | 6    | 11   | hypothetical protein, conserved                                                                                          |
| Tb09.211.3170 | 10   | 11   | 3    | hypothetical protein, conserved                                                                                          |
| Tb09.211.3200 | 10   | 35   | 52   | mitochondrial carrier protein, putative                                                                                  |
| Tb09.211.3230 | 8    | 6    | 84   | hypothetical protein, conserved                                                                                          |
| Tb09.211.3420 | 300  | 343  | 886  | riboflavin kinase, putative                                                                                              |
| Tb09.211.3470 | 13   | 16   | 11   | hypothetical protein, conserved                                                                                          |
| Tb09.211.3500 | 67   | 57   | 18   | hypothetical protein, conserved                                                                                          |
| Tb09.211.3530 | 1    | 1    | 4    | hypothetical protein, conserved                                                                                          |
| Tb09.211.3630 | 3    | 11   | 33   | hypothetical protein, conserved                                                                                          |
| Tb09.211.3680 | 8    | 13   | 15   | chaperone protein DNAJ, putative                                                                                         |
| Tb09.211.3720 | 1    | 0    | 0    | hypothetical protein, conserved                                                                                          |
| Tb09.211.3800 | 26   | 36   | 10   | hypothetical protein, conserved                                                                                          |
| Tb09.211.3900 | 61   | 85   | 26   | hypothetical protein, conserved                                                                                          |
| Tb09.211.4370 | 3    | 14   | 8    | hypothetical protein, conserved                                                                                          |
| Tb09.211.4380 | 7    | 6    | 1    | hypothetical protein, conserved                                                                                          |
| Tb09.211.4400 | 4    | 4    | 1    | hypothetical protein, conserved                                                                                          |
| Tb09.211.4510 | 17   | 22   | 4    | hypothetical protein, conserved                                                                                          |
| Tb09.211.4511 | 2    | 1    | 4    | kinetoplastid membrane protein KMP1                                                                                      |
| Tb09.211.4512 | 297  | 171  | 1102 | kinetoplastid membrane protein KMP1                                                                                      |
| Tb09.211.4513 | 274  | 170  | 1059 | kinetoplastid membrane protein KMP1                                                                                      |
| Tb09.211.4580 | 6    | 8    | 11   | hypothetical protein, conserved                                                                                          |
| Tb09.211.4700 | 12   | 7    | 9    | reiske iron-sulfur protein , mitochondrial precursor                                                                     |
| Tb09.211.4740 | 0    | 0    | 0    | hypothetical protein, conserved                                                                                          |
| Tb09.211.4880 | 6    | 12   | 10   | cyclophilin-like protein, putative                                                                                       |
| Tb09.244.2860 | 2472 | 4587 | 1475 | hypothetical protein, conserved                                                                                          |
| Tb09.244.2840 | 89   | 72   | 49   | hypothetical protein, conserved                                                                                          |
| Tb09.244.2670 | 13   | 6    | 4    | hypothetical protein, conserved                                                                                          |
| Tb09.244.2640 | 16   | 15   | 2    | hypothetical protein, conserved                                                                                          |
| Tb09.244.2620 | 3    | 3    | 11   | NADH-ubiquinone oxidoreductase complex I subunit, putative                                                               |
| Tb09.v4.0018  | 8    | 1    | 3    | expression site-associated gene (ESAG) protein, putative;<br>expression site-associated gene 3 (ESAG3) protein, putative |
| Tb10.100.0070 | 76   | 100  | 167  | ATP synthase F1 subunit gamma protein, putative                                                                          |
| Tb10.100.0160 | 44   | 36   | 362  | cytochrome oxidase subunit VI                                                                                            |
| Tb10.100.0220 | 14   | 12   | 9    | mitochondrial structure specific endonuclease I (SSE), putative                                                          |
| Tb10.70.7960  | 4    | 4    | 9    | hypothetical protein, conserved                                                                                          |
| Tb10.70.7900  | 0    | 2    | 7    | hypothetical protein, conserved                                                                                          |
| Tb10.70.7840  | 37   | 41   | 199  | choline dehydrogenase, putative                                                                                          |
| Tb10.70.7760  | 249  | 239  | 500  | hypothetical protein, conserved                                                                                          |
| Tb10.70.7650  | 26   | 30   | 19   | hypothetical protein, conserved                                                                                          |
| Tb10.70.7640  | 3    | 4    | 3    | hypothetical protein, conserved                                                                                          |
| Tb10.70.7550  | 14   | 14   | 71   | 2-oxoisovalerate dehydrogenase alpha subunit, putative                                                                   |
| Tb10.70.7540  | 19   | 42   | 15   | hypothetical protein, conserved                                                                                          |

|              |     |     |     |                                                                                      |
|--------------|-----|-----|-----|--------------------------------------------------------------------------------------|
| Tb10.70.7530 | 2   | 5   | 0   | hypothetical protein, conserved                                                      |
| Tb10.70.7500 | 11  | 3   | 0   | hypothetical protein, conserved                                                      |
| Tb10.70.7450 | 20  | 12  | 69  | hypothetical protein, conserved                                                      |
| Tb10.70.7440 | 2   | 0   | 3   | hypothetical protein, conserved                                                      |
| Tb10.70.7250 | 7   | 8   | 32  | hypothetical protein, conserved                                                      |
| Tb10.70.6930 | 159 | 124 | 338 | hypothetical protein, conserved                                                      |
| Tb10.70.6820 | 57  | 98  | 102 | hypothetical protein, conserved                                                      |
| Tb10.70.6800 | 163 | 223 | 106 | aspartyl-tRNA synthetase, putative                                                   |
| Tb10.70.6690 | 125 | 140 | 17  | hypothetical protein, conserved                                                      |
| Tb10.70.6640 | 28  | 20  | 21  | hypothetical protein, conserved                                                      |
| Tb10.70.6350 | 33  | 51  | 39  | hypothetical protein, conserved                                                      |
| Tb10.70.6340 | 4   | 9   | 100 | ATPase subunit 9, putative                                                           |
| Tb10.70.6260 | 4   | 3   | 4   | hypothetical protein, conserved                                                      |
| Tb10.70.6150 | 80  | 85  | 48  | hypothetical protein, conserved                                                      |
| Tb10.70.5970 | 180 | 160 | 41  | hypothetical protein, conserved                                                      |
| Tb10.70.5960 | 58  | 34  | 50  | hypothetical protein, conserved                                                      |
| Tb10.70.5900 | 29  | 27  | 27  | hypothetical protein, conserved                                                      |
| Tb10.70.5880 | 29  | 14  | 31  | hypothetical protein, conserved; leucine-rich repeat protein (LRRP), putative        |
| Tb10.70.5830 | 15  | 12  | 16  | actin-like protein, putative                                                         |
| Tb10.70.5780 | 1   | 2   | 3   | hypothetical protein, conserved                                                      |
| Tb10.70.5720 | 25  | 16  | 94  | hypothetical protein, conserved                                                      |
| Tb10.70.5510 | 1   | 1   | 3   | adrenodoxin reductase, putative; ferredoxin NADP <sup>+</sup> reductase-like protein |
| Tb10.70.5430 | 8   | 6   | 3   | hypothetical protein, conserved                                                      |
| Tb10.70.5380 | 164 | 100 | 52  | pyruvate dehydrogenase complex E3 binding protein, putative                          |
| Tb10.70.5130 | 207 | 94  | 44  | adenylate kinase, putative                                                           |
| Tb10.70.5120 | 68  | 54  | 79  | malate dehydrogenase, putative                                                       |
| Tb10.70.5110 | 170 | 74  | 493 | mitochondrial malate dehydrogenase                                                   |
| Tb10.70.5080 | 28  | 23  | 10  | hypothetical protein, conserved                                                      |
| Tb10.70.4980 | 47  | 59  | 100 | hypothetical protein, conserved                                                      |
| Tb10.70.4850 | 6   | 5   | 2   | hypothetical protein, conserved                                                      |
| Tb10.70.4600 | 50  | 59  | 4   | GTP-binding protein, putative; elongation factor, putative                           |
| Tb10.70.4500 | 13  | 16  | 21  | hypothetical protein, conserved                                                      |
| Tb10.70.4380 | 4   | 6   | 12  | cytochrome C oxidase assembly protein, putative                                      |
| Tb10.70.4280 | 46  | 19  | 30  | delta-pyrroline-5-carboxylate dehydrogenase, putative                                |
| Tb10.70.4220 | 157 | 143 | 224 | hypothetical protein, conserved                                                      |
| Tb10.70.4120 | 4   | 14  | 3   | hypothetical protein, conserved                                                      |
| Tb10.70.3850 | 0   | 0   | 1   | RNA-editing complex protein; RNA editing 3' exouridylylase; KREX2                    |
| Tb10.70.3840 | 181 | 142 | 45  | hypothetical protein, conserved                                                      |
| Tb10.70.3820 | 18  | 34  | 4   | hypothetical protein, conserved                                                      |
| Tb10.70.3790 | 1   | 3   | 2   | hypothetical protein, conserved                                                      |
| Tb10.70.3680 | 18  | 16  | 32  | rRNA dimethyltransferase, putative                                                   |
| Tb10.70.3590 | 21  | 58  | 130 | hypothetical protein, conserved; predicted TPR repeat protein                        |
| Tb10.70.3280 | 164 | 119 | 217 | methylglutaconyl-CoA hydratase, mitochondrial precursor, putative                    |
| Tb10.70.3260 | 0   | 0   | 0   | hypothetical protein, conserved                                                      |
| Tb10.70.3190 | 270 | 288 | 306 | hypothetical protein, conserved                                                      |
| Tb10.70.3150 | 9   | 15  | 98  | NADH-ubiquinone oxidoreductase complex I subunit, putative                           |

|                |      |      |      |                                                                                                          |
|----------------|------|------|------|----------------------------------------------------------------------------------------------------------|
| Tb10.70.3010   | 4    | 11   | 71   | hypothetical protein, conserved                                                                          |
| Tb10.70.2970   | 687  | 712  | 1485 | hypothetical protein, conserved                                                                          |
| Tb10.70.2900   | 21   | 15   | 8    | 2-oxoisovalerate dehydrogenase beta subunit, mitochondrial precursor, putative                           |
| Tb10.70.2670   | 12   | 7    | 23   | hypothetical protein, conserved                                                                          |
| Tb10.70.2630   | 61   | 80   | 43   | mitochondrial inner membrane signal peptidase, putative; serine peptidase clan SF, family S26B, putative |
| Tb10.70.2350   | 87   | 63   | 58   | hypothetical protein, conserved                                                                          |
| Tb10.70.2320   | 34   | 7    | 103  | hypothetical protein, conserved                                                                          |
| Tb10.70.2290   | 114  | 136  | 27   | mitochondrial carrier protein, putative                                                                  |
| Tb10.70.2210   | 19   | 11   | 65   | cell division related protein kinase 2, putative; CDC2-related protein kinase                            |
| Tb10.70.2190   | 15   | 15   | 56   | Mitochondrial elongation factor G, putative                                                              |
| Tb10.70.2155   | 30   | 58   | 662  | hypothetical protein, conserved                                                                          |
| Tb10.70.2150   | 57   | 51   | 24   | hypothetical protein, conserved                                                                          |
| Tb10.70.2100   | 207  | 144  | 140  | RNA-editing complex protein; RNA-binding protein; KREPA4                                                 |
| Tb10.70.2090   | 6    | 15   | 26   | RNA-editing complex protein; KREPA6                                                                      |
| Tb10.70.1890   | 9    | 21   | 17   | hypothetical protein, conserved                                                                          |
| Tb10.70.1750   | 7    | 8    | 10   | RNA editing endoribonuclease                                                                             |
| Tb10.70.1640   | 41   | 32   | 50   | hypothetical protein, conserved                                                                          |
| Tb10.70.1580   | 1    | 7    | 20   | RNA editing endoribonuclease                                                                             |
| Tb10.70.1520   | 13   | 24   | 73   | hypothetical protein, conserved                                                                          |
| Tb10.70.1460   | 40   | 40   | 38   | hypothetical protein, conserved                                                                          |
| Tb10.70.1430   | 69   | 59   | 21   | hypothetical protein, conserved                                                                          |
| Tb10.70.1410   | 13   | 11   | 9    | protein phosphatase 2C, putative                                                                         |
| Tb10.70.1330   | 5    | 9    | 16   | heat shock protein, putative                                                                             |
| Tb10.70.1120   | 21   | 39   | 123  | hypothetical protein, conserved; predicted RanGDP binding protein                                        |
| Tb10.70.1000   | 422  | 571  | 228  | hypothetical protein, conserved                                                                          |
| Tb10.70.0850   | 39   | 42   | 70   | proteasome alpha 1 subunit, putative; 20S proteasome subunit alpha-6, putative                           |
| Tb10.70.0660   | 30   | 39   | 15   | hypothetical protein, conserved                                                                          |
| Tb10.70.0625   | 12   | 18   | 67   | hypothetical protein, conserved                                                                          |
| Tb10.70.0530   | 24   | 14   | 32   | hypothetical protein, conserved                                                                          |
| Tb10.70.0430   | 105  | 87   | 95   | chaperonin Hsp60, mitochondrial precursor                                                                |
| Tb10.70.0380   | 14   | 7    | 3    | hypothetical protein                                                                                     |
| Tb10.70.0280   | 235  | 106  | 322  | chaperonin Hsp60, mitochondrial precursor                                                                |
| Tb10.6k15.3900 | 24   | 29   | 29   | hypothetical protein, conserved                                                                          |
| Tb10.6k15.3700 | 130  | 94   | 11   | hypothetical protein, conserved                                                                          |
| Tb10.6k15.3640 | 489  | 88   | 20   | alternative oxidase                                                                                      |
| Tb10.6k15.3290 | 12   | 12   | 124  | hypothetical protein, conserved                                                                          |
| Tb10.6k15.3250 | 4344 | 4019 | 3501 | succinyl-CoA ligase [GDP-forming] beta-chain, putative                                                   |
| Tb10.6k15.3140 | 17   | 7    | 29   | folylpolyglutamate-dihydrofolate synthetase, putative                                                    |
| Tb10.6k15.3080 | 63   | 6    | 158  | dihydrolipoamide acetyltransferase E2 subunit, putative                                                  |
| Tb10.6k15.3040 | 122  | 124  | 80   | hypothetical protein, conserved                                                                          |
| Tb10.6k15.3030 | 307  | 224  | 539  | mitochondrial ATP-dependent zinc metallopeptidase, putative; metallo-peptidase, Clan MA(E) Family M41    |
| Tb10.6k15.2875 | 1    | 0    | 0    | hypothetical protein, conserved                                                                          |
| Tb10.6k15.2800 | 33   | 42   | 26   | hypothetical protein                                                                                     |
| Tb10.6k15.2640 | 119  | 85   | 249  | hypothetical protein, conserved                                                                          |
| Tb10.6k15.2530 | 41   | 31   | 9    | hypothetical protein, conserved                                                                          |

|                |     |     |     |                                                                                         |
|----------------|-----|-----|-----|-----------------------------------------------------------------------------------------|
| Tb10.6k15.2510 | 10  | 21  | 238 | hypothetical protein, conserved                                                         |
| Tb10.6k15.2490 | 8   | 4   | 23  | TFIIF-stimulated CTD phosphatase, putative                                              |
| Tb10.6k15.2410 | 117 | 104 | 145 | hypothetical protein, conserved                                                         |
| Tb10.6k15.2360 | 54  | 66  | 17  | hypothetical protein, conserved                                                         |
| Tb10.6k15.2310 | 146 | 92  | 87  | RNA-editing complex protein; KREPA2                                                     |
| Tb10.6k15.2180 | 63  | 43  | 167 | cytochrome oxidase subunit IX                                                           |
| Tb10.6k15.1930 | 2   | 1   | 6   | hypothetical protein, conserved                                                         |
| Tb10.6k15.1920 | 20  | 19  | 32  | hypothetical protein, conserved                                                         |
| Tb10.6k15.1910 | 85  | 24  | 142 | hypothetical protein, conserved                                                         |
| Tb10.6k15.1800 | 16  | 36  | 25  | hypothetical protein, conserved                                                         |
| Tb10.6k15.1600 | 10  | 5   | 9   | kinetoplast DNA-associated protein, putative                                            |
| Tb10.6k15.1460 | 52  | 2   | 14  | kinetoplast DNA-associated protein, putative                                            |
| Tb10.6k15.1450 | 130 | 66  | 162 | hypothetical protein, conserved                                                         |
| Tb10.6k15.1430 | 287 | 197 | 123 | hypothetical protein, conserved                                                         |
| Tb10.6k15.1310 | 10  | 21  | 13  | hypothetical protein, conserved                                                         |
| Tb10.6k15.1300 | 127 | 142 | 24  | hypothetical protein, conserved                                                         |
| Tb10.6k15.1280 | 217 | 276 | 86  | hypothetical protein, conserved                                                         |
| Tb10.6k15.1220 | 104 | 86  | 186 | isoleucyl-tRNA synthetase, putative                                                     |
| Tb10.6k15.1130 | 4   | 11  | 10  | hypothetical protein, conserved                                                         |
| Tb10.6k15.1120 | 14  | 9   | 16  | hypothetical protein, conserved                                                         |
| Tb10.6k15.0980 | 2   | 2   | 3   | ATP-dependent chaperone, putative; mitochondrial chaperone BCS1, putative               |
| Tb10.6k15.0960 | 150 | 109 | 44  | NADH dehydrogenase                                                                      |
| Tb10.6k15.0550 | 5   | 10  | 30  | hypothetical protein, conserved                                                         |
| Tb10.6k15.0520 | 107 | 77  | 38  | hypothetical protein, conserved                                                         |
| Tb10.6k15.0500 | 11  | 7   | 30  | hypothetical protein, conserved                                                         |
| Tb10.6k15.0490 | 42  | 25  | 39  | mitochondrial intermediate peptidase, putative; metallo-peptidase, Clan MA(E) Family M3 |
| Tb10.6k15.0480 | 69  | 9   | 67  | hypothetical protein, conserved                                                         |
| Tb10.6k15.0440 | 4   | 5   | 3   | hypothetical protein, conserved                                                         |
| Tb10.6k15.0340 | 26  | 14  | 9   | hypothetical protein, conserved                                                         |
| Tb10.6k15.0310 | 14  | 18  | 13  | hypothetical protein, conserved                                                         |
| Tb10.6k15.0170 | 20  | 26  | 26  | hypothetical protein, conserved                                                         |
| Tb10.6k15.0160 | 25  | 31  | 7   | hypothetical protein, conserved                                                         |
| Tb10.6k15.0150 | 22  | 7   | 10  | hypothetical protein, conserved                                                         |
| Tb10.6k15.0120 | 138 | 176 | 35  | hypothetical protein, conserved                                                         |
| Tb10.406.0630  | 2   | 1   | 2   | hypothetical protein, conserved                                                         |
| Tb10.406.0620  | 2   | 6   | 9   | hypothetical protein, conserved                                                         |
| Tb10.406.0510  | 53  | 28  | 83  | hypothetical protein, conserved                                                         |
| Tb10.406.0490  | 31  | 41  | 37  | monothiol glutaredoxin, putative                                                        |
| Tb10.406.0230  | 47  | 52  | 11  | hypothetical protein, conserved                                                         |
| Tb10.406.0140  | 68  | 84  | 30  | hypothetical protein, conserved                                                         |
| Tb10.406.0100  | 10  | 5   | 6   | hypothetical protein, conserved                                                         |
| Tb10.406.0050  | 172 | 90  | 216 | RNA-binding protein, putative; HNRNPA                                                   |
| Tb10.26.1020   | 29  | 53  | 256 | hypothetical protein, conserved                                                         |
| Tb10.26.1000   | 334 | 459 | 178 | hypothetical protein, conserved                                                         |
| Tb10.26.0860   | 34  | 41  | 15  | HIRA-interacting protein 5, putative                                                    |
| Tb10.26.0750   | 13  | 9   | 7   | hypothetical protein, conserved                                                         |
| Tb10.26.0700   | 0   | 5   | 4   | hypothetical protein                                                                    |

|               |     |     |     |                                                                                                        |
|---------------|-----|-----|-----|--------------------------------------------------------------------------------------------------------|
| Tb10.26.0600  | 16  | 14  | 14  | hypothetical protein, conserved                                                                        |
| Tb10.26.0585  | 38  | 22  | 32  | hypothetical protein, conserved                                                                        |
| Tb10.26.0530  | 4   | 5   | 3   | hypothetical protein, conserved                                                                        |
| Tb10.26.0410  | 0   | 0   | 0   | hypothetical protein, conserved                                                                        |
| Tb10.26.0390  | 45  | 53  | 112 | hypothetical protein, conserved                                                                        |
| Tb10.26.0100  | 126 | 155 | 340 | hypothetical protein, conserved                                                                        |
| Tb10.26.0050  | 2   | 4   | 30  | hypothetical protein, conserved                                                                        |
| Tb10.389.1910 | 6   | 12  | 17  | hypothetical protein, conserved                                                                        |
| Tb10.389.1890 | 67  | 117 | 49  | hypothetical protein, conserved                                                                        |
| Tb10.389.1880 | 4   | 8   | 10  | hypothetical protein, conserved                                                                        |
| Tb10.389.1840 | 37  | 67  | 4   | ABC1 protein, putative                                                                                 |
| Tb10.389.1785 | 15  | 24  | 21  | hypothetical protein, conserved                                                                        |
| Tb10.389.1710 | 8   | 14  | 21  | hypothetical protein, conserved                                                                        |
| Tb10.389.1670 | 36  | 69  | 13  | hypothetical protein, conserved                                                                        |
| Tb10.389.1490 | 15  | 14  | 19  | hypothetical protein, conserved                                                                        |
| Tb10.389.1440 | 109 | 78  | 22  | hypothetical protein, conserved                                                                        |
| Tb10.389.1160 | 19  | 34  | 4   | hypothetical protein, conserved                                                                        |
| Tb10.389.1140 | 46  | 18  | 26  | electron transfer protein, putative; ferredoxin, putative                                              |
| Tb10.389.1130 | 172 | 117 | 52  | hypothetical protein, conserved                                                                        |
| Tb10.389.1110 | 1   | 1   | 0   | hypothetical protein                                                                                   |
| Tb10.389.0900 | 21  | 22  | 20  | hypothetical protein, conserved                                                                        |
| Tb10.389.0890 | 6   | 7   | 13  | pyruvate dehydrogenase E1 alpha subunit, putative                                                      |
| Tb10.389.0690 | 2   | 11  | 28  | mitochondrial carrier protein, putative; mitochondrial 2-oxoglutarate/malate carrier protein, putative |
| Tb10.389.0650 | 40  | 39  | 89  | hypothetical protein, conserved                                                                        |
| Tb10.389.0630 | 193 | 110 | 201 | bifunctional aminoacyl-tRNA synthetase, putative                                                       |
| Tb10.389.0610 | 64  | 53  | 37  | hypothetical protein, conserved                                                                        |
| Tb10.389.0590 | 7   | 6   | 6   | hypothetical protein, conserved                                                                        |
| Tb10.389.0340 | 6   | 13  | 9   | mitochondrial carrier protein, putative                                                                |
| Tb10.389.0130 | 11  | 16  | 17  | 30S ribosomal protein S8, putative                                                                     |
| Tb10.05.0150  | 52  | 4   | 9   | citrate synthase, putative                                                                             |
| Tb10.05.0200  | 22  | 13  | 32  | protein kinase, putative                                                                               |
| Tb10.05.0050  | 36  | 42  | 23  | hypothetical protein, conserved; hypothetical protein                                                  |
| Tb10.05.0070  | 194 | 313 | 476 | NADH-ubiquinone oxidoreductase complex I subunit,FT putative                                           |
| Tb10.389.0020 | 7   | 3   | 6   | phosphatidic acid phosphatase alpha, putative                                                          |
| Tb10.61.3115  | 7   | 5   | 8   | hypothetical protein, conserved                                                                        |
| Tb10.61.3110  | 367 | 377 | 258 | hypothetical protein, conserved                                                                        |
| Tb10.61.3100  | 50  | 74  | 40  | chaperone protein DNAJ, putative                                                                       |
| Tb10.61.3070  | 35  | 32  | 24  | hypothetical protein, conserved                                                                        |
| Tb10.61.3000  | 9   | 6   | 17  | hypothetical protein, conserved                                                                        |
| Tb10.61.2990  | 117 | 92  | 181 | hypothetical protein, conserved                                                                        |
| Tb10.61.2830  | 0   | 0   | 0   | hypothetical protein                                                                                   |
| Tb10.61.2600  | 327 | 531 | 143 | hypothetical protein, conserved                                                                        |
| Tb10.61.2540  | 12  | 27  | 18  | hypothetical protein, conserved                                                                        |
| Tb10.61.2510  | 45  | 52  | 10  | mitochondrial carrier protein, putative                                                                |
| Tb10.61.2420  | 41  | 35  | 33  | hypothetical protein, conserved                                                                        |
| Tb10.61.1830  | 218 | 294 | 666 | mitochondrial carrier protein, putative; ADP/ATP translocase 1, putative                               |

|              |     |     |     |                                                                                                                 |
|--------------|-----|-----|-----|-----------------------------------------------------------------------------------------------------------------|
| Tb10.61.1820 | 203 | 303 | 656 | mitochondrial carrier protein, putative; ADP/ATP translocase 1, putative                                        |
| Tb10.61.1810 | 251 | 333 | 668 | mitochondrial carrier protein, putative; ADP/ATP translocase 1, putative                                        |
| Tb10.61.1790 | 14  | 21  | 37  | hypothetical protein, conserved                                                                                 |
| Tb10.61.1530 | 584 | 707 | 304 | lipoic acid synthetase, mitochondrial precursor, putative                                                       |
| Tb10.61.1300 | 7   | 3   | 8   | hypothetical protein, conserved                                                                                 |
| Tb10.61.1290 | 30  | 24  | 27  | hypothetical protein, conserved                                                                                 |
| Tb10.61.1260 | 53  | 27  | 132 | hypothetical protein, conserved                                                                                 |
| Tb10.61.0690 | 215 | 185 | 143 | tRNA pseudouridine synthase A-like protein                                                                      |
| Tb10.61.0610 | 68  | 59  | 33  | mitochondrial carrier protein, putative                                                                         |
| Tb10.61.0510 | 56  | 129 | 140 | hypothetical protein, conserved                                                                                 |
| Tb10.61.0460 | 11  | 21  | 79  | hypothetical protein, conserved                                                                                 |
| Tb10.61.0395 | 24  | 13  | 26  | hypothetical protein, conserved                                                                                 |
| Tb10.61.0340 | 26  | 23  | 32  | cation transporter, putative                                                                                    |
| Tb10.61.0280 | 47  | 11  | 9   | receptor-type adenylate cyclase GRESAG 4, putative; expression site-associated gene 4 (ESAG4) protein, putative |
| Tb10.61.0270 | 3   | 4   | 2   | hypothetical protein                                                                                            |
| Tb10.61.0200 | 7   | 12  | 31  | hypothetical protein, conserved                                                                                 |
| Tb10.61.0190 | 38  | 47  | 55  | hypothetical protein, conserved                                                                                 |
| Tb10.61.0110 | 30  | 21  | 32  | ATP-dependent zinc metallopeptidase, putative; metallo-peptidase, Clan MA(E) Family M41                         |
| Tb10.61.0090 | 15  | 13  | 18  | potassium voltage-gated channel, putative                                                                       |
| Tb10.v4.0043 | 17  | 13  | 6   | branched-chain alpha-keto acid dehydrogenase e1-beta subunit precursor, putative                                |
| Tb10.v4.0053 | 7   | 6   | 10  | hypothetical protein                                                                                            |
| Tb11.03.0960 | 4   | 5   | 13  | hypothetical protein, conserved                                                                                 |
| Tb11.03.0950 | 251 | 323 | 850 | electron transfer flavoprotein, putative                                                                        |
| Tb11.03.0900 | 9   | 10  | 3   | hypothetical protein, conserved                                                                                 |
| Tb11.03.0870 | 77  | 88  | 342 | mitochondrial carrier protein, putative                                                                         |
| Tb11.03.0660 | 24  | 16  | 4   | hypothetical protein, conserved                                                                                 |
| Tb11.03.0510 | 5   | 7   | 15  | hypothetical protein, conserved                                                                                 |
| Tb11.03.0490 | 232 | 233 | 108 | hypothetical protein, conserved                                                                                 |
| Tb11.03.0475 | 96  | 38  | 56  | hypothetical protein, conserved                                                                                 |
| Tb11.03.0440 | 9   | 11  | 19  | hypothetical protein, conserved                                                                                 |
| Tb11.03.0260 | 113 | 86  | 88  | hypothetical protein, conserved                                                                                 |
| Tb11.03.0180 | 18  | 15  | 8   | RNA-editing complex protein; KREPB5                                                                             |
| Tb11.03.0110 | 10  | 3   | 10  | chaperone protein DNAJ, putative                                                                                |
| Tb11.47.0024 | 3   | 6   | 3   | hypothetical protein, unknown function                                                                          |
| Tb11.47.0022 | 25  | 26  | 34  | hypothetical protein, conserved                                                                                 |
| Tb11.47.0020 | 40  | 35  | 23  | hypothetical protein, conserved                                                                                 |
| Tb11.47.0018 | 120 | 72  | 66  | NADH-cytochrome b5 reductase, putative                                                                          |
| Tb11.47.0017 | 51  | 34  | 38  | NADH-ubiquinone oxidoreductase 20 kDa subunit, mitochondrial precursor                                          |
| Tb11.47.0014 | 372 | 404 | 34  | hypothetical protein, conserved                                                                                 |
| Tb11.47.0012 | 25  | 36  | 53  | glutaredoxin, putative                                                                                          |
| Tb11.47.0009 | 32  | 49  | 25  | hypothetical protein, conserved                                                                                 |
| Tb11.47.0004 | 79  | 123 | 237 | transketolase:dehydrogenase-like protein                                                                        |
| Tb11.55.0026 | 185 | 198 | 58  | Isovaleryl Coenzyme A dehydrogenase, putative                                                                   |
| Tb11.55.0017 | 9   | 14  | 17  | hypothetical protein, unknown function                                                                          |

|              |     |     |     |                                                                                                                                 |
|--------------|-----|-----|-----|---------------------------------------------------------------------------------------------------------------------------------|
| Tb11.55.0016 | 5   | 3   | 5   | hypothetical protein, conserved                                                                                                 |
| Tb11.55.0030 | 12  | 12  | 22  | hypothetical protein, conserved                                                                                                 |
| Tb11.55.0010 | 23  | 9   | 32  | hypothetical protein, conserved                                                                                                 |
| Tb11.55.0009 | 307 | 319 | 384 | mitochondrial RNA binding protein 1; gBP21, MRP1                                                                                |
| Tb11.46.0012 | 45  | 19  | 30  | hypothetical protein, conserved                                                                                                 |
| Tb11.46.0007 | 82  | 100 | 44  | hypothetical protein, conserved                                                                                                 |
| Tb11.46.0006 | 31  | 38  | 48  | hypothetical protein, conserved                                                                                                 |
| Tb11.57.0002 | 77  | 92  | 40  | hypothetical protein, conserved                                                                                                 |
| Tb11.02.0130 | 56  | 72  | 44  | hypothetical protein, conserved                                                                                                 |
| Tb11.02.0180 | 12  | 9   | 38  | hypothetical protein, conserved                                                                                                 |
| Tb11.02.0250 | 19  | 14  | 367 | heat shock protein 84, putative                                                                                                 |
| Tb11.02.0290 | 20  | 6   | 15  | succinyl-coA:3-ketoacid-coenzyme A transferase, mitochondrial precursor, putative                                               |
| Tb11.02.0320 | 57  | 82  | 53  | hypothetical protein, conserved                                                                                                 |
| Tb11.02.0355 | 49  | 33  | 17  | hypothetical protein, conserved                                                                                                 |
| Tb11.02.0430 | 12  | 9   | 11  | hypothetical protein, conserved                                                                                                 |
| Tb11.02.0440 | 48  | 55  | 24  | glycerolphosphate mutase, putative                                                                                              |
| Tb11.02.0445 | 23  | 20  | 63  | hypothetical protein, conserved                                                                                                 |
| Tb11.02.0490 | 12  | 11  | 32  | RNA-editing complex protein; KREPB4                                                                                             |
| Tb11.02.0510 | 20  | 19  | 22  | hypothetical protein, conserved                                                                                                 |
| Tb11.02.0540 | 201 | 133 | 91  | hypothetical protein                                                                                                            |
| Tb11.02.0770 | 6   | 4   | 15  | mitochondrial DNA polymerase I protein D, putative                                                                              |
| Tb11.02.1110 | 5   | 9   | 15  | hypothetical protein, conserved                                                                                                 |
| Tb11.02.1150 | 42  | 47  | 42  | hypothetical protein, conserved                                                                                                 |
| Tb11.02.1180 | 21  | 14  | 19  | hypothetical protein, conserved                                                                                                 |
| Tb11.02.1350 | 10  | 7   | 11  | hypothetical protein, conserved                                                                                                 |
| Tb11.02.1440 | 94  | 82  | 60  | hypothetical protein, conserved                                                                                                 |
| Tb11.02.1480 | 41  | 44  | 208 | mitochondrial processing peptidase alpha subunit, putative; metallo-peptidase, Clan ME, Family M16                              |
| Tb11.02.1520 | 81  | 66  | 105 | hypothetical protein, conserved                                                                                                 |
| Tb11.02.1610 | 123 | 155 | 207 | hypothetical protein, conserved                                                                                                 |
| Tb11.02.1860 | 35  | 37  | 70  | hypothetical protein, conserved                                                                                                 |
| Tb11.02.1880 | 30  | 37  | 18  | hypothetical protein, conserved                                                                                                 |
| Tb11.02.2070 | 287 | 208 | 144 | long-chain-fatty acid-CoA ligase protein, putative; acyl-CoA synthetase, putative; fatty acid thiokinase (long chain), putative |
| Tb11.02.2250 | 89  | 86  | 128 | hypothetical protein, conserved                                                                                                 |
| Tb11.02.2280 | 23  | 40  | 80  | hypothetical protein, conserved                                                                                                 |
| Tb11.02.2300 | 82  | 54  | 37  | mitochondrial DNA polymerase I protein B, putative; DNA polymerase I-like protein B                                             |
| Tb11.02.2390 | 10  | 9   | 12  | pyruvate dehydrogenase (lipoamide) kinase, putative                                                                             |
| Tb11.02.2420 | 104 | 95  | 104 | hypothetical protein, conserved                                                                                                 |
| Tb11.02.2460 | 17  | 14  | 47  | hypothetical protein, conserved                                                                                                 |
| Tb11.02.2480 | 28  | 31  | 13  | hypothetical protein, conserved                                                                                                 |
| Tb11.02.2680 | 1   | 3   | 16  | hypothetical protein, conserved                                                                                                 |
| Tb11.02.2700 | 21  | 12  | 14  | fumarate hydratase class I, putative                                                                                            |
| Tb11.02.2710 | 31  | 39  | 22  | hypothetical protein, conserved                                                                                                 |
| Tb11.02.2740 | 55  | 78  | 26  | aspartate aminotransferase, mitochondrial                                                                                       |
| Tb11.02.2910 | 27  | 25  | 28  | hypothetical protein, conserved                                                                                                 |
| Tb11.02.2960 | 46  | 39  | 111 | mitochondrial carrier protein, putative                                                                                         |

|              |     |     |     |                                                                                                                                             |
|--------------|-----|-----|-----|---------------------------------------------------------------------------------------------------------------------------------------------|
| Tb11.02.3060 | 13  | 21  | 9   | hypothetical protein, conserved                                                                                                             |
| Tb11.02.3130 | 2   | 17  | 28  | malic enzyme, putative                                                                                                                      |
| Tb11.02.3180 | 5   | 8   | 44  | hypothetical protein, conserved                                                                                                             |
| Tb11.02.3230 | 10  | 6   | 6   | hypothetical protein, conserved                                                                                                             |
| Tb11.02.3310 | 373 | 413 | 430 | hypothetical protein, conserved                                                                                                             |
| Tb11.02.3470 | 2   | 4   | 3   | formin, putative; formin-like protein                                                                                                       |
| Tb11.02.3510 | 1   | 1   | 2   | hypothetical protein, conserved                                                                                                             |
| Tb11.02.3530 | 23  | 21  | 10  | mitochondrial DNA-directed RNA polymerase                                                                                                   |
| Tb11.02.3570 | 255 | 190 | 140 | hypothetical protein, conserved                                                                                                             |
| Tb11.02.3670 | 24  | 27  | 9   | hypothetical protein, conserved                                                                                                             |
| Tb11.02.3720 | 8   | 3   | 2   | hypothetical protein, conserved                                                                                                             |
| Tb11.02.3800 | 13  | 12  | 19  | hypothetical protein, conserved                                                                                                             |
| Tb11.02.3810 | 80  | 100 | 77  | hypothetical protein, conserved                                                                                                             |
| Tb11.02.3830 | 13  | 11  | 33  | hypothetical protein, conserved                                                                                                             |
| Tb11.02.3930 | 3   | 1   | 2   | hypothetical protein, conserved                                                                                                             |
| Tb11.02.4020 | 19  | 11  | 173 | hypothetical protein, conserved                                                                                                             |
| Tb11.02.4120 | 365 | 470 | 880 | hypothetical protein, conserved                                                                                                             |
| Tb11.02.4330 | 20  | 12  | 19  | hypothetical protein, conserved                                                                                                             |
| Tb11.02.4400 | 260 | 87  | 119 | hypothetical protein, conserved                                                                                                             |
| Tb11.02.4480 | 6   | 8   | 12  | 3-methylcrotonoyl-CoA carboxylase beta subunit, putative                                                                                    |
| Tb11.02.4500 | 75  | 55  | 72  | hypothetical protein, conserved                                                                                                             |
| Tb11.02.4535 | 12  | 4   | 31  | hypothetical protein, conserved                                                                                                             |
| Tb11.02.4600 | 4   | 4   | 3   | hypothetical protein, conserved                                                                                                             |
| Tb11.02.4660 | 4   | 4   | 6   | hypothetical protein, conserved                                                                                                             |
| Tb11.02.4730 | 9   | 14  | 21  | DNA repair and recombination helicase protein PIF1, putative;<br>DNA repair and recombination protein, mitochondrial precursor,<br>putative |
| Tb11.02.4800 | 51  | 20  | 30  | NADH-cytochrome b5 reductase-like protein                                                                                                   |
| Tb11.02.4810 | 6   | 10  | 53  | hypothetical protein, conserved                                                                                                             |
| Tb11.02.4890 | 594 | 509 | 307 | pterin-4-alpha-carbinolamine dehydratase, putative                                                                                          |
| Tb11.02.5100 | 4   | 7   | 38  | hypothetical protein, conserved                                                                                                             |
| Tb11.02.5160 | 2   | 51  | 33  | hypothetical protein, conserved                                                                                                             |
| Tb11.02.5280 | 46  | 16  | 22  | glycerol-3-phosphate dehydrogenase, putative                                                                                                |
| Tb11.02.5290 | 2   | 7   | 4   | hypothetical protein, conserved                                                                                                             |
| Tb11.02.5390 | 21  | 21  | 20  | hypothetical protein, conserved                                                                                                             |
| Tb11.02.5530 | 3   | 8   | 15  | electron-transfer-flavoprotein, alpha polypeptide, putative                                                                                 |
| Tb11.02.5580 | 6   | 9   | 11  | hypothetical protein, conserved                                                                                                             |
| Tb11.02.5660 | 28  | 18  | 34  | hypothetical protein, conserved                                                                                                             |
| Tb11.02.5670 | 23  | 23  | 15  | hypothetical protein, conserved                                                                                                             |
| Tb11.02.5770 | 87  | 85  | 113 | mitochondrial RNA binding protein; RBP16; RNA- binding protein<br>of 16 kDa                                                                 |
| Tb11.02.5780 | 39  | 44  | 45  | hypothetical protein, conserved                                                                                                             |
| Tb11.02.5820 | 6   | 14  | 23  | hypothetical protein, conserved                                                                                                             |
| Tb11.01.0500 | 280 | 295 | 279 | hypothetical protein, conserved                                                                                                             |
| Tb11.01.0430 | 17  | 9   | 44  | hypothetical protein, conserved                                                                                                             |
| Tb11.01.0150 | 12  | 20  | 7   | hypothetical protein, conserved                                                                                                             |
| Tb11.12.0014 | 28  | 37  | 42  | hypothetical protein, conserved                                                                                                             |
| Tb11.01.0610 | 222 | 198 | 227 | mitochondrial DEAD box protein; KREH1                                                                                                       |
| Tb11.01.0640 | 35  | 29  | 76  | NADH-ubiquinone oxidoreductase complex I subunit, putative                                                                                  |



|              |      |      |     |                                                                                                                            |
|--------------|------|------|-----|----------------------------------------------------------------------------------------------------------------------------|
| Tb11.01.0710 | 11   | 21   | 11  | elongation factor G2-like protein                                                                                          |
| Tb11.01.0880 | 31   | 40   | 155 | hypothetical protein, conserved                                                                                            |
| Tb11.01.0890 | 36   | 65   | 15  | hypothetical protein, conserved                                                                                            |
| Tb11.01.1040 | 39   | 55   | 17  | hypothetical protein, conserved                                                                                            |
| Tb11.01.1080 | 4    | 6    | 2   | tRNA pseudouridine synthase, putative                                                                                      |
| Tb11.01.1100 | 31   | 31   | 25  | helicase-like protein                                                                                                      |
| Tb11.01.1130 | 20   | 12   | 12  | prenyltransferase, putative                                                                                                |
| Tb11.01.1160 | 3    | 2    | 3   | lipoate-protein ligase, putative; lipoyltransferase, putative                                                              |
| Tb11.01.1320 | 6    | 4    | 2   | oxidoreductase, putative                                                                                                   |
| Tb11.01.1360 | 38   | 47   | 3   | hypothetical protein, conserved                                                                                            |
| Tb11.01.1440 | 4    | 4    | 20  | aminomethyltransferase, putative                                                                                           |
| Tb11.01.1500 | 97   | 85   | 59  | hypothetical protein, conserved                                                                                            |
| Tb11.01.1600 | 138  | 95   | 195 | hypothetical protein, conserved                                                                                            |
| Tb11.01.1660 | 17   | 22   | 15  | hypothetical protein, conserved                                                                                            |
| Tb11.01.1690 | 26   | 19   | 26  | hypothetical protein, conserved                                                                                            |
| Tb11.01.1740 | 1027 | 1142 | 893 | 2-oxoglutarate dehydrogenase E1 component, putative                                                                        |
| Tb11.01.1810 | 14   | 10   | 90  | hypothetical protein, conserved                                                                                            |
| Tb11.01.1840 | 104  | 102  | 102 | hypothetical protein, conserved                                                                                            |
| Tb11.01.1900 | 17   | 20   | 67  | hypothetical protein, conserved                                                                                            |
| Tb11.01.1910 | 5    | 8    | 11  | hypothetical protein, conserved                                                                                            |
| Tb11.01.1930 | 6    | 3    | 20  | hypothetical protein, conserved                                                                                            |
| Tb11.01.2000 | 1147 | 754  | 810 | hslVU complex proteolytic subunit, putative; hslVU complex proteolytic subunit, threonine peptidase, Clan T(1), family T1B |
| Tb11.01.2170 | 21   | 24   | 38  | hypothetical protein, conserved                                                                                            |
| Tb11.01.2280 | 13   | 9    | 20  | ubiquinone biosynthesis methyltransferase, putative                                                                        |
| Tb11.01.2340 | 20   | 39   | 22  | hypothetical protein, conserved                                                                                            |
| Tb11.01.2360 | 7    | 15   | 66  | hypothetical protein, conserved                                                                                            |
| Tb11.01.2370 | 22   | 29   | 75  | hypothetical protein, conserved                                                                                            |
| Tb11.01.2460 | 19   | 8    | 9   | hypothetical protein, conserved                                                                                            |
| Tb11.01.2490 | 160  | 168  | 156 | hypothetical protein, conserved                                                                                            |
| Tb11.01.2740 | 3    | 4    | 26  | hypothetical protein, conserved                                                                                            |
| Tb11.01.2910 | 34   | 39   | 15  | hypothetical protein, conserved                                                                                            |
| Tb11.01.2920 | 1    | 1    | 10  | hypothetical protein, conserved                                                                                            |
| Tb11.01.3070 | 50   | 26   | 213 | hypothetical protein, conserved                                                                                            |
| Tb11.01.3190 | 8    | 12   | 73  | hypothetical protein, conserved                                                                                            |
| Tb11.01.3200 | 187  | 192  | 45  | hypothetical protein, conserved                                                                                            |
| Tb11.01.3290 | 118  | 132  | 67  | hypothetical protein, conserved                                                                                            |
| Tb11.01.3300 | 10   | 13   | 9   | hypothetical protein, conserved                                                                                            |
| Tb11.01.3340 | 131  | 81   | 127 | 2,3-bisphosphoglycerate-independent phosphoglycerate mutase-like protein, putative                                         |
| Tb11.01.3490 | 26   | 40   | 49  | hypothetical protein, conserved                                                                                            |
| Tb11.01.3500 | 3    | 3    | 25  | hypothetical protein, conserved                                                                                            |
| Tb11.01.3550 | 85   | 129  | 82  | 2-oxoglutarate dehydrogenase E2 component, putative                                                                        |
| Tb11.01.3710 | 53   | 92   | 26  | hypothetical protein, conserved                                                                                            |
| Tb11.01.3760 | 126  | 86   | 21  | hypothetical protein, conserved                                                                                            |
| Tb11.01.3780 | 231  | 296  | 134 | cytochrome oxidase assembly protein, putative                                                                              |
| Tb11.01.3860 | 101  | 99   | 947 | hypothetical protein, conserved                                                                                            |
| Tb11.01.3970 | 61   | 66   | 73  | hypothetical protein, conserved                                                                                            |
| Tb11.01.4170 | 8    | 12   | 4   | DNA photolyase, putative                                                                                                   |

|              |     |     |     |                                                                            |
|--------------|-----|-----|-----|----------------------------------------------------------------------------|
| Tb11.01.4590 | 5   | 7   | 22  | hypothetical protein, conserved                                            |
| Tb11.01.4702 | 30  | 39  | 81  | cytochrome oxidase subunit X                                               |
| Tb11.01.4740 | 57  | 186 | 231 | hypothetical protein, conserved                                            |
| Tb11.01.4860 | 153 | 73  | 92  | mitochondrial RNA binding protein 2                                        |
| Tb11.01.4870 | 37  | 27  | 46  | inner membrane preprotein translocase Tim17, putative                      |
| Tb11.01.5040 | 300 | 318 | 41  | mitochondrial carrier protein, putative                                    |
| Tb11.01.5110 | 5   | 8   | 4   | hypothetical protein, conserved                                            |
| Tb11.01.5180 | 17  | 10  | 62  | ubiquinone biosynthesis protein-like protein                               |
| Tb11.01.5185 | 7   | 5   | 6   | hypothetical protein, conserved                                            |
| Tb11.01.5200 | 30  | 25  | 11  | hypothetical protein, conserved                                            |
| Tb11.01.5280 | 196 | 251 | 255 | hypothetical protein, conserved                                            |
| Tb11.01.5330 | 10  | 13  | 67  | hypothetical protein, conserved                                            |
| Tb11.01.5390 | 45  | 34  | 15  | hypothetical protein, conserved                                            |
| Tb11.01.5400 | 57  | 34  | 44  | hypothetical protein, conserved                                            |
| Tb11.01.5460 | 53  | 62  | 83  | hypothetical protein, conserved                                            |
| Tb11.01.5480 | 13  | 17  | 6   | hypothetical protein, conserved                                            |
| Tb11.01.5960 | 19  | 6   | 15  | mitochondrial carrier protein, putative                                    |
| Tb11.01.5980 | 1   | 5   | 7   | hypothetical protein, conserved                                            |
| Tb11.01.6080 | 10  | 9   | 3   | ubiquitin carboxyl-terminal hydrolase, putative                            |
| Tb11.01.6180 | 4   | 13  | 3   | hypothetical protein, conserved                                            |
| Tb11.01.6320 | 67  | 112 | 74  | hypothetical protein, conserved                                            |
| Tb11.01.6580 | 3   | 4   | 5   | hypothetical protein, conserved                                            |
| Tb11.01.6620 | 599 | 624 | 206 | hypothetical protein, conserved                                            |
| Tb11.01.6680 | 69  | 7   | 35  | chaperonin Hsp60, mitochondrial precursor, putative; heat shock protein 60 |
| Tb11.01.6710 | 2   | 2   | 3   | hypothetical protein, conserved                                            |
| Tb11.01.6950 | 19  | 8   | 8   | hypothetical protein, conserved                                            |
| Tb11.01.7090 | 154 | 192 | 74  | hypothetical protein, conserved                                            |
| Tb11.01.7110 | 58  | 54  | 23  | methionyl-trna formyltransferase                                           |
| Tb11.01.7140 | 206 | 209 | 214 | hypothetical protein, conserved                                            |
| Tb11.01.7260 | 13  | 19  | 9   | hypothetical protein, conserved                                            |
| Tb11.01.7290 | 14  | 59  | 19  | NUDIX hydrolase, conserved                                                 |
| Tb11.01.7300 | 8   | 12  | 10  | poly(A) polymerase, putative                                               |
| Tb11.01.7340 | 9   | 7   | 18  | hypothetical protein, conserved                                            |
| Tb11.01.7370 | 63  | 85  | 35  | hypothetical protein, conserved                                            |
| Tb11.01.7460 | 45  | 84  | 58  | NADH-ubiquinone oxidoreductase complex I subunit, putative                 |
| Tb11.01.7480 | 5   | 17  | 32  | superoxide dismutase, putative                                             |
| Tb11.01.7510 | 134 | 52  | 22  | hypothetical protein, conserved                                            |
| Tb11.01.7900 | 0   | 1   | 3   | hypothetical protein, conserved                                            |
| Tb11.01.8050 | 18  | 14  | 3   | hypothetical protein, conserved                                            |
| Tb11.01.8070 | 10  | 7   | 14  | hypothetical protein, conserved                                            |
| Tb11.01.8090 | 9   | 6   | 26  | kinetoplast DNA-associated protein, putative                               |
| Tb11.01.8110 | 10  | 12  | 55  | hypothetical protein, conserved                                            |
| Tb11.01.8120 | 1   | 2   | 0   | hypothetical protein, conserved                                            |
| Tb11.01.8200 | 104 | 100 | 333 | enoyl-CoA hydratase/isomerase family protein, putative                     |
| Tb11.01.8225 | 137 | 122 | 430 | hypothetical protein, conserved                                            |
| Tb11.01.8230 | 7   | 13  | 4   | hypothetical protein, conserved                                            |
| Tb11.01.8470 | 163 | 219 | 273 | dihydrolipoyl dehydrogenase                                                |
| Tb11.01.8500 | 312 | 623 | 99  | hypothetical protein, conserved                                            |

|              |     |     |     |                                                                                             |
|--------------|-----|-----|-----|---------------------------------------------------------------------------------------------|
| Tb11.01.8620 | 32  | 41  | 20  | hypothetical protein, conserved                                                             |
| Tb11.01.8630 | 134 | 134 | 110 | hypothetical protein, conserved                                                             |
| Tb11.01.8700 | 6   | 4   | 3   | ABC transporter, putative                                                                   |
| Tb11.01.8710 | 3   | 4   | 2   | hypothetical protein, conserved                                                             |
| Tb927.1.730  | 10  | 12  | 12  | hypothetical protein, conserved                                                             |
| Tb927.1.740  | 7   | 2   | 9   | hypothetical protein, conserved                                                             |
| Tb927.1.790  | 28  | 22  | 10  | hypothetical protein, conserved                                                             |
| Tb927.1.840  | 6   | 6   | 21  | hypothetical protein, conserved                                                             |
| Tb927.1.1000 | 15  | 11  | 43  | developmentally regulated phosphoprotein                                                    |
| Tb927.1.1130 | 20  | 10  | 16  | glycerol-3-phosphate dehydrogenase (FAD-dependent), putative                                |
| Tb927.1.1160 | 28  | 24  | 6   | hypothetical protein, conserved                                                             |
| Tb927.1.1200 | 6   | 8   | 0   | hypothetical protein, conserved                                                             |
| Tb927.1.1210 | 9   | 6   | 6   | hypothetical protein, conserved                                                             |
| Tb927.1.1330 | 20  | 32  | 38  | hypothetical protein, conserved                                                             |
| Tb927.1.1580 | 173 | 193 | 265 | cytochrome c oxidase assembly factor, putative; electron transport protein SCO1/2, putative |
| Tb927.1.1610 | 117 | 129 | 66  | hypothetical protein, conserved                                                             |
| Tb927.1.1690 | 6   | 12  | 10  | RNA-editing complex protein; RNA editing endoribonuclease                                   |
| Tb927.1.1730 | 8   | 11  | 67  | hypothetical protein, conserved                                                             |
| Tb927.1.2320 | 47  | 42  | 10  | hypothetical protein, conserved                                                             |
| Tb927.1.2730 | 10  | 6   | 2   | hypothetical protein, conserved                                                             |
| Tb927.1.2990 | 23  | 24  | 8   | hypothetical protein, conserved                                                             |
| Tb927.1.3010 | 26  | 22  | 26  | hypothetical protein, conserved                                                             |
| Tb927.1.3030 | 606 | 516 | 185 | RNA editing ligase; RNA-editing complex protein; KREL2                                      |
| Tb927.1.3040 | 7   | 7   | 11  | hypothetical protein, conserved                                                             |
| Tb927.1.3800 | 14  | 14  | 73  | hypothetical protein, conserved                                                             |
| Tb927.1.4100 | 0   | 0   | 0   | cytochrome oxidase subunit IV                                                               |
| Tb927.1.4230 | 72  | 110 | 57  | hypothetical protein, conserved                                                             |
| Tb927.1.4970 | 12  | 20  | 4   | hypothetical protein                                                                        |
| Tb927.1.5000 | 18  | 10  | 104 | hypothetical protein, conserved                                                             |
| Tb11.0400    | -   | -   | -   |                                                                                             |
| Tb927.5.295b | -   | -   | -   |                                                                                             |
| Tb927.5.450b | -   | -   | -   | Alternative version (resequencing) of Tb927.5.450                                           |
| Tb11.1220    | -   | -   | -   |                                                                                             |
| Tb11.0420    | -   | -   | -   |                                                                                             |
| Tb11.0300    | -   | -   | -   |                                                                                             |
| Tb11.0550    | -   | -   | -   |                                                                                             |
| Tb11.0320    | -   | -   | -   |                                                                                             |
| Tb927.5.500b | -   | -   | -   |                                                                                             |

Table S10A. Alternatively spliced transcripts from the long slender bloodstream form.

| Gene ID        | LS TPM (1)         | LS UTR length                        | Description                                                                      |
|----------------|--------------------|--------------------------------------|----------------------------------------------------------------------------------|
| Tb927.3.3050   | 4,1,2              | -52,-38,1893                         | hypothetical protein, conserved                                                  |
| Tb10.26.0750   | 4,6,1,2            | 12,16,25,80                          | hypothetical protein, conserved                                                  |
| Tb11.01.8070   | 1,1,2,1,1,6        | 112,137,156,423,739,746              | hypothetical protein, conserved                                                  |
| Tb927.4.1130   | 2,1,1,6,7,1        | 3,14,15,16,38,39                     | hypothetical protein, conserved                                                  |
| Tb927.8.2670   | 5,1,2,2,1,1,7,6    | 2722,2718,2652,1743,1352,221,14,-459 | hypothetical protein, conserved                                                  |
| Tb10.70.5130   | 49,60,1,98,1       | 258,255,43,32,-118                   | adenylate kinase, putative                                                       |
| Tb927.2.5930   | 2,2                | 375,315                              | hypothetical protein, conserved                                                  |
| Tb09.160.2060  | 1,1,1,1            | 172,170,157,146                      | hypothetical protein, conserved                                                  |
| Tb10.70.1330   | 2,2,1              | 59,46,27                             | heat shock protein, putative                                                     |
| Tb11.01.1910   | 2,1,1,1,1          | 311,292,268,266,79                   | hypothetical protein, conserved                                                  |
| Tb11.02.5820   | 1,1,2,2            | -806,-9,6,52                         | hypothetical protein, conserved                                                  |
| Tb11.02.5670   | 1,2,13,7,1         | 16,50,193,242,1018                   | hypothetical protein, conserved                                                  |
| Tb927.7.3520   | 1,1,2,1            | 52,62,75,139                         | hypothetical protein, conserved                                                  |
| Tb10.70.6690   | 1,1,32,1,3,74,14   | 143,155,168,279,282,779,784          | hypothetical protein, conserved                                                  |
| Tb927.6.3600   | 1,1,4,1,1,1,1,1    | -<br>175,71,84,94,113,136,137,160    | hypothetical protein, conserved                                                  |
| Tb10.26.0600   | 6,7,3,1            | 1144,534,79,30                       | hypothetical protein, conserved                                                  |
| Tb927.6.4580   | 3,2,...            | 137,1683,...                         | hypothetical protein, conserved                                                  |
| Tb927.8.4470   | 7,14,1,8,1,1,1     | -40,-35,-29,47,49,57,110             | chaperone protein DNAJ, putative                                                 |
| Tb927.3.4420   | 6,7,10,3           | 54,62,72,73                          | hypothetical protein, conserved                                                  |
| Tb09.211.4880  | 1,1,3,1            | -416,59,185,331                      | cyclophilin-like protein, putative                                               |
| Tb927.7.910    | 15,1,1,14,1        | 91,266,268,281,595                   | hypothetical protein, conserved                                                  |
| Tb927.2.4890   | 1,1                | 21,48                                | ribosomal protein L11, putative                                                  |
| Tb927.1.1330   | 1,7,10,3           | 22,20,19,16                          | hypothetical protein, conserved                                                  |
| Tb927.7.1370   | 4,1,3,1,9,1        | 3219,2889,2237,1469,1401,6           | spliced leader RNA PSE-promoter transcription factor, putative                   |
| Tb10.6k15.1220 | 2,49,2,2,46,3,1,1  | 903,334,-41,-142,-154,-163,-173,-175 | isoleucyl-tRNA synthetase, putative                                              |
| Tb927.7.4200   | 2,2,10,1,6         | 767,78,75,4,-235                     | hypothetical protein, conserved                                                  |
| Tb927.8.5640   | 3,1,5,1,1          | 854,152,112,39,-840                  | hypothetical protein, conserved                                                  |
| Tb10.v4.0043   | 1,9,8              | 17,24,689                            | branched-chain alpha-keto acid dehydrogenase e1-beta subunit precursor, putative |
| Tb927.3.770    | 1,1                | 57,488                               | hypothetical protein, conserved                                                  |
| Tb10.389.0590  | 2,1,1,3            | 181,204,214,234                      | hypothetical protein, conserved                                                  |
| Tb927.6.3740   | 1,1,2              | 22,43,58                             | heat shock 70 kDa protein, mitochondrial precursor, putative                     |
| Tb927.6.4540   | 1,1,1,1,1          | 33,50,431,489,522                    | 3-hydroxy-3-methylglutaryl-CoA reductase, putative                               |
| Tb09.211.2600  | 15,1,13,1,27,7,1   | 883,881,880,868,93,69,-216           | hypothetical protein, conserved                                                  |
| Tb10.6k15.1130 | 1,2,2              | 184,144,139                          | hypothetical protein, conserved                                                  |
| Tb10.6k15.1310 | 5,1,3,1,1,1        | 26,12,-143,-148,-154,-211            | hypothetical protein, conserved                                                  |
| Tb927.7.2990   | 1,1,16,1,9         | 869,846,203,200,126                  | hypothetical protein, conserved                                                  |
| Tb927.8.1700   | 5,11,131,2,7,1,120 | -201,-198,-196,-84,-38,101,114       | hypothetical protein, conserved                                                  |

|                |                       |                                           |                                                                                                    |
|----------------|-----------------------|-------------------------------------------|----------------------------------------------------------------------------------------------------|
| Tb927.3.3680   | 2,1,1                 | 90,52,49                                  | hypothetical protein, conserved                                                                    |
| Tb927.7.560    | 1,2,7,1,10            | -1367,-682,60,96,195                      | hypothetical protein, conserved                                                                    |
| Tb927.1.3010   | 1,7,10,9              | 127,63,39,22                              | hypothetical protein, conserved                                                                    |
| Tb09.211.3680  | 4,1,3,1               | 439,111,-61,-64                           | chaperone protein DNAJ, putative                                                                   |
| Tb11.01.6710   | 1,1,1                 | -5,35,40                                  | hypothetical protein, conserved                                                                    |
| Tb11.02.4020   | 8,10                  | 16,36                                     | hypothetical protein, conserved                                                                    |
| Tb11.02.1480   | 1,1,6,18,1,2,12,1     | 1148,1145,1117,1093,1075,1001,132,57      | mitochondrial processing peptidase alpha subunit, putative; metallo-peptidase, Clan ME, Family M16 |
| Tb10.61.0200   | 1,2,1,1,3,1           | 138,135,129,119,86,72                     | hypothetical protein, conserved                                                                    |
| Tb927.4.700    | 1,1                   | 2,313                                     | hypothetical protein, conserved                                                                    |
| Tb927.6.680    | 1,1,1,1,2,1,3,1       | 142,151,157,177,191,210,292,1209          | hypothetical protein, conserved                                                                    |
| Tb927.7.5720   | 1,1,8,4               | 163,162,145,106                           | hypothetical protein, conserved                                                                    |
| Tb11.01.8700   | 3,2,1                 | 47,51,83                                  | ABC transporter, putative                                                                          |
| Tb11.01.3190   | 1,4,2,2               | 43,41,36,33                               | hypothetical protein, conserved                                                                    |
| Tb927.8.2530   | 1,1,6,21,4,1,7        | 1444,1400,953,936,915,844,113             | hypothetical protein, conserved                                                                    |
| Tb927.2.4700   | 1,1,1,1,2,3,2         | 438,501,506,508,2036,2042,2292            | hypothetical protein, conserved                                                                    |
| Tb927.7.2560   | 1,1,2,2,3,4           | -2248,-1321,-1281,-51,298,311             | hypothetical protein, conserved                                                                    |
| Tb11.02.2460   | 1,2,4,1,7,1,1         | 1507,1506,1502,1490,32,23,20              | hypothetical protein, conserved                                                                    |
| Tb11.01.3200   | 109,1,45,1,31,1       | 751,672,584,571,101,88                    | hypothetical protein, conserved                                                                    |
| Tb927.6.2140   | 1,1,7,1,14            | 60,62,78,690,693                          | hypothetical protein, conserved                                                                    |
| Tb927.3.1940   | 1,26,32,1,1           | -181,4,13,2077,2202                       | hypothetical protein, conserved                                                                    |
| Tb11.01.3300   | 3,3,4                 | 55,41,39                                  | hypothetical protein, conserved                                                                    |
| Tb927.7.5550   | 1,10,1,1,40,13,4,2    | 333,314,295,253,-58,-61,-101,-278         | hypothetical protein, conserved                                                                    |
| Tb09.160.4750  | 1,1,1,7,11,1          | 115,89,85,66,-7,-23                       | hypothetical protein, conserved                                                                    |
| Tb10.v4.0053   | 1,3,3                 | 57,125,146                                | hypothetical protein                                                                               |
| Tb10.70.7840   | 1,22,13,1,1           | 224,194,176,173,142                       | choline dehydrogenase, putative                                                                    |
| Tb09.160.0360  | 1,2,2,1,1,2,3,4,1,1   | 248,252,298,425,466,471,481,998,1038,1550 | hypothetical protein, conserved                                                                    |
| Tb11.02.1350   | 2,1,1,1,6,1,1         | 292,282,268,256,234,215,179               | hypothetical protein, conserved                                                                    |
| Tb11.02.5100   | 2,1,1                 | 4,1,-6                                    | hypothetical protein, conserved                                                                    |
| Tb927.8.4960   | 2,2,9,4,1,7,3,2       | 610,608,600,128,49,30,10,-76              | hypothetical protein, conserved                                                                    |
| Tb11.01.6950   | 1,1,1,1,1,1,5,2,1,6   | -133,-85,-77,-52,-49,-47,-27,-18,-6,37    | hypothetical protein, conserved                                                                    |
| Tb927.6.1590   | 2,2,3                 | -745,-742,172                             | hypothetical protein, conserved                                                                    |
| Tb927.8.8360   | 3,3,1,3,1,2,1,3       | 2076,1113,1108,757,729,688,687,33         | receptor-type adenylate cyclase GRESAG 4, putative                                                 |
| Tb11.01.5980   | 1,1                   | 126,92                                    | hypothetical protein, conserved                                                                    |
| Tb10.6k15.3900 | 6,5,12,1              | 691,119,116,82                            | hypothetical protein, conserved                                                                    |
| Tb10.70.7250   | 4,3                   | 48,37                                     | hypothetical protein, conserved                                                                    |
| Tb11.02.4810   | 1,3,2                 | 70,93,97                                  | hypothetical protein, conserved                                                                    |
| Tb10.6k15.0520 | 46,61,1               | 34,28,17                                  | hypothetical protein, conserved                                                                    |
| Tb927.8.6040   | 1,2451,2,2397,3244,18 | 1777,1754,1732,1207,697,                  | hypothetical protein, conserved                                                                    |

|               |                          |                                                  |                                                              |
|---------------|--------------------------|--------------------------------------------------|--------------------------------------------------------------|
|               | 2,12,140,1               | 693,690,10,9                                     |                                                              |
| Tb927.4.4620  | 7,11,6                   | 20,25,43                                         | cytochrome oxidase subunit VIII                              |
| Tb927.3.4890  | 1,4,1,...                | 2,10,889,...                                     | ubiquinone biosynthesis protein COQ7 homolog, putative       |
| Tb927.6.4450  | 1,1,1,1,1,2              | -743,21,29,84,91,162                             | hypothetical protein, conserved                              |
| Tb927.7.3770  | 1,6,3,1,13               | -815,62,93,124,130                               | hypothetical protein, conserved                              |
| Tb11.01.8710  | 1,1,1                    | 796,981,985                                      | hypothetical protein, conserved                              |
| Tb11.12.0014  | 12,1,15,1                | 389,385,12,-407                                  | hypothetical protein, conserved                              |
| Tb927.1.740   | 4,2,1                    | 25,73,80                                         | hypothetical protein, conserved                              |
| Tb927.5.1520  | 8,7                      | 229,282                                          | heat shock protein HslVU, ATPase subunit HslU, putative      |
| Tb11.02.0430  | 3,2,7,1                  | -324,-153,91,116                                 | hypothetical protein, conserved                              |
| Tb927.4.3660  | 3,10,8                   | 36,74,115                                        | hypothetical protein, conserved                              |
| Tb11.55.0016  | 2,1,1,1                  | 82,112,117,135                                   | hypothetical protein, conserved                              |
| Tb927.7.2220  | 6,3,1,1,2,1              | 90,93,95,97,309,386                              | hypothetical protein, conserved                              |
| Tb09.v1.0420  | 1,1,4,1,1,3              | -<br>120,27,60,1547,1559,1568                    | hypothetical protein, conserved                              |
| Tb11.02.3060  | 6,2,4,1                  | 28,-5,-11,-29                                    | hypothetical protein, conserved                              |
| Tb09.211.4580 | 1,3,2,1                  | 151,213,242,248                                  | hypothetical protein, conserved                              |
| Tb10.61.1260  | 23,1,29,1                | 125,116,110,104                                  | hypothetical protein, conserved                              |
| Tb10.389.0900 | 1,10,9,2                 | 36,43,158,716                                    | hypothetical protein, conserved                              |
| Tb11.01.5185  | 1,3,2                    | 30,36,109                                        | hypothetical protein, conserved                              |
| Tb927.1.3800  | 1,1,5,7                  | 336,115,73,63                                    | hypothetical protein, conserved                              |
| Tb927.5.1790  | 2,1,1,1,1,1,3,1,1,10,1,1 | 513,482,473,127,117,106,9<br>8,81,64,46,37,-1259 | hypothetical protein, conserved                              |
| Tb927.1.5000  | 10,6,1,1                 | 36,21,19,6                                       | hypothetical protein, conserved                              |
| Tb11.01.5960  | 8,9,1,1                  | 72,67,13,0                                       | mitochondrial carrier protein, putative                      |
| Tb10.70.6340  | 2,1,1                    | 89,124,150                                       | ATPase subunit 9, putative                                   |
| Tb927.2.5900  | 6,6,1,1,1                | -28,-31,-34,-2595,-2794                          | hypothetical protein, conserved                              |
| Tb10.389.1140 | 19,1,24,1,1,1            | 39,43,813,1700,1714,1745                         | electron transfer protein, putative;<br>ferredoxin, putative |
| Tb09.160.1280 | 1,1,4,1,3,3              | -344,-191,9,36,39,52                             | hypothetical protein, conserved                              |
| Tb11.02.3470  | 1,1                      | 240,237                                          | formin, putative; formin-like protein                        |
| Tb927.7.6350  | 1,1,3,13,1,3,3           | 158,185,308,315,706,709,1<br>357                 | NADH-ubiquinone oxidoreductase,<br>mitochondrial, putative   |
| Tb927.7.4440  | 1,2,1                    | 270,314,2176                                     | hypothetical protein, conserved                              |
| Tb11.55.0030  | 1,1,2,1,7,1              | -28,-9,83,233,238,261                            | hypothetical protein, conserved                              |
| Tb927.5.3870  | 3,1,2,1                  | 1682,1676,69,65                                  | hypothetical protein, conserved                              |
| Tb927.7.3270  | 6,4,1                    | 24,38,40                                         | hypothetical protein, conserved                              |
| Tb927.8.6060  | 17,1,18,12               | 191,162,146,132                                  | 2-amino-3-ketobutyrate coenzyme A<br>ligase, putative        |
| Tb927.5.2070  | 2,1,11,4,3,1,1,4,2,1,17  | 36,42,43,52,60,66,72,80,84<br>,85,88             | hypothetical protein, conserved                              |
| Tb09.211.3470 | 7,4,1,1                  | 693,688,679,47                                   | hypothetical protein, conserved                              |
| Tb927.7.7330  | 2,4,1,2,2,1,1            | 13,74,91,92,103,108,158                          | hypothetical protein, conserved                              |
| Tb927.4.2940  | 34,3,21,6,1              | 1413,137,55,38,-86                               | hypothetical protein, conserved                              |
| Tb11.47.0020  | 1,19,5,1,15,1            | 4349,724,719,712,64,62                           | hypothetical protein, conserved                              |
| Tb11.02.0320  | 4,20,25,2,1,5            | 106,109,111,151,719,1051                         | hypothetical protein, conserved                              |
| Tb927.6.1840  | 4,46,39,3,2,1,5          | 226,245,248,253,254,257,2<br>59                  | hypothetical protein, conserved                              |

|                |                       |                                          |                                                                                    |
|----------------|-----------------------|------------------------------------------|------------------------------------------------------------------------------------|
| Tb927.5.4040   | 3,4,1                 | 68,71,107                                | hypothetical protein, conserved                                                    |
| Tb10.389.0340  | 1,2,3                 | 171,175,194                              | mitochondrial carrier protein, putative                                            |
| Tb11.01.3860   | 57,44,1               | -136,-139,-170                           | hypothetical protein, conserved                                                    |
| Tb11.01.6080   | 2,2,2,5               | 54,52,48,-400                            | ubiquitin carboxyl-terminal hydrolase, putative                                    |
| Tb927.4.3150   | 3,1,3,1               | 212,191,155,149                          | hypothetical protein, conserved                                                    |
| Tb927.6.4040   | 1,1,7,6,2             | -9,8,36,38,87                            | hypothetical protein, conserved                                                    |
| Tb927.5.2150   | 14,1,1,23,1,1,1,5,... | -1120,-805,9,11,151,700,707,729,..<br>.. | hypothetical protein, conserved                                                    |
| Tb927.7.2490   | 6,4,1,11,1,4          | 56,65,77,81,87,479                       | hypothetical protein, conserved                                                    |
| Tb927.7.3950   | 6,3,3                 | 271,217,202                              | RNA-editing complex protein; RNA-editing 3' terminal uridylyl transferase 1; KRET1 |
| Tb10.406.0100  | 1,1,2,2,2,3           | -32,8,13,19,21,29                        | hypothetical protein, conserved                                                    |
| Tb10.6k15.2490 | 1,3,4                 | 126,135,330                              | TFIIF-stimulated CTD phosphatase, putative                                         |
| Tb10.70.7960   | 1,2,1,1,1             | 27,25,22,13,-14                          | hypothetical protein, conserved                                                    |
| Tb927.3.1690   | 1,23,4,1,10           | 62,70,75,177,185                         | hypothetical protein, conserved                                                    |
| Tb927.3.5600   | 1,1,1,1,10,6          | 78,72,62,31,14,5                         | hypothetical protein, conserved                                                    |
| Tb11.01.4740   | 1,22,3,6,11,14,1      | 33,38,46,242,252,260,279                 | hypothetical protein, conserved                                                    |
| Tb927.8.5560   | 1,29,1,1,44           | 137,120,-22,-122,-150                    | hypothetical protein, conserved                                                    |
| Tb11.02.2700   | 7,1,3,1,10            | 164,144,106,47,-88                       | fumarate hydratase class I, putative                                               |
| Tb11.02.0290   | 3,6,2,1,8             | 60,74,76,78,79                           | succinyl-coA:3-ketoacid-coenzyme A transferase, mitochondrial precursor, putative  |
| Tb10.70.4380   | 2,2                   | 80,46                                    | cytochrome C oxidase assembly protein, putative                                    |
| Tb09.160.4310  | 37,61,3,1,1           | 236,154,143,139,-1512                    | glutamate dehydrogenase                                                            |
| Tb927.8.3830   | 1,1,4,1,1,1,1         | 100,111,118,208,212,232,233              | ATP-dependent DEAD-H RNA helicase, putative                                        |
| Tb927.6.4930   | 5,9,2                 | 21,-27,-31                               | hypothetical protein, conserved                                                    |
| Tb11.02.2280   | 4,12,7                | 263,202,196                              | hypothetical protein, conserved                                                    |
| Tb10.61.2990   | 3,45,70               | 22,45,1002                               | hypothetical protein, conserved                                                    |
| Tb927.7.3970   | 1,1,154,1,99,1,1      | 513,498,493,491,457,453,-218             | hypothetical protein, conserved                                                    |
| Tb927.2.4110   | 1,1,1,1,1             | 157,160,221,224,533                      | mitochondrial processing peptidase alpha subunit, putative                         |
| Tb927.3.1790   | 3,3,4                 | 121,128,130                              | pyruvate dehydrogenase E1 beta subunit, putative                                   |
| Tb09.211.0510  | 1,1                   | 51,78                                    | cytochrome c oxidase assembly factor, putative                                     |
| Tb11.01.0150   | 1,2,3,3,1,1,2         | 481,429,425,421,389,238,-982             | hypothetical protein, conserved                                                    |
| Tb11.01.0880   | 13,15,3               | 74,30,17                                 | hypothetical protein, conserved                                                    |
| Tb09.211.4700  | 3,1,7,1               | -69,174,177,191                          | reiske iron-sulfur protein, mitochondrial precursor                                |
| Tb11.01.6180   | 2,1,1                 | 95,92,-194                               | hypothetical protein, conserved                                                    |
| Tb09.211.0760  | 2,1,2,6               | -34,42,48,51                             | hypothetical protein, conserved                                                    |
| Tb927.2.5210   | 1,3,10,1,28,8,1       | 102,101,65,61,30,26,-31                  | 3-oxoacyl-(acyl-carrier protein) reductase, putative                               |
| Tb927.2.3420   | 1,1,7,2,18,5          | 92,175,178,382,389,391                   | hypothetical protein, conserved                                                    |

|                |                  |                                   |                                                                    |
|----------------|------------------|-----------------------------------|--------------------------------------------------------------------|
| Tb11.01.7480   | 1,3,1            | 113,116,121                       | superoxide dismutase, putative                                     |
| Tb927.3.4210   | 1,1              | -113,-52                          | hypothetical protein, conserved                                    |
| Tb11.02.5290   | 1,1,1            | 111,38,-178                       | hypothetical protein, conserved                                    |
| Tb10.6k15.2510 | 2,6,3            | 15,18,21                          | hypothetical protein, conserved                                    |
| Tb11.01.0890   | 9,2,5,1,20       | -142,-145,-176,-191,-203          | hypothetical protein, conserved                                    |
| Tb927.7.5110   | 3,4,1            | 83,14,6                           | hypothetical protein, conserved                                    |
| Tb927.8.7290   | 1,2,2            | 109,106,36                        | hypothetical protein, conserved                                    |
| Tb11.02.4800   | 3,28,20          | -65,-59,47                        | NADH-cytochrome b5 reductase-like protein                          |
| Tb927.7.3750   | 1,4,1,6,1        | 370,414,417,425,475               | TFIIF-stimulated CTD phosphatase, putative                         |
| Tb11.01.2920   | 1,1              | 102,70                            | hypothetical protein, conserved                                    |
| Tb927.6.4400   | 1,4,1,2          | 19,29,92,162                      | hypothetical protein, conserved                                    |
| Tb09.244.2860  | ...,17,1,122,2   | ...,1982,1979,41,39               | hypothetical protein, conserved                                    |
| Tb927.8.2760   | 5,6              | 49,45                             | hypothetical protein, conserved                                    |
| Tb10.61.0460   | 6,3,2            | 176,167,147                       | hypothetical protein, conserved                                    |
| Tb927.8.2190   | 4,1,11,1,1,1,1,1 | 567,561,27,9,6,-3,-5,-6           | hypothetical protein, conserved                                    |
| Tb927.3.4700   | 1,1,1,18,1,2,1,7 | -59,-52,31,36,101,102,103,106     | hypothetical protein, conserved                                    |
| Tb927.5.450    | 14,19            | 708,714                           | NADH-ubiquinone oxidoreductase, mitochondrial, putative            |
| Tb927.8.3690   | 3,4              | 235,258                           | isocitrate dehydrogenase [NADP], mitochondrial precursor, putative |
| Tb927.7.3990   | 2,4,1,1,1        | 1128,471,459,42,-784              | mitochondrial DNA polymerase I protein C                           |
| Tb927.8.5280   | 52,2,53,1,1      | 42,39,37,14,0                     | hypothetical protein, conserved                                    |
| Tb10.100.0220  | 8,1,5,1          | 16,15,11,-12                      | mitochondrial structure specific endonuclease I (SSE-1), putative  |
| Tb10.70.0660   | 9,2,2,1,15,1     | -3546,-545,94,104,107,124         | hypothetical protein, conserved                                    |
| Tb11.01.1040   | 9,20,1,1,1,1,6,1 | 166,90,75,69,67,-1251,-1254,-1260 | hypothetical protein, conserved                                    |
| Tb927.3.4140   | 7,9,1,1,1,2      | 16,18,46,47,48,583                | hypothetical protein, conserved                                    |

(1) TPM (tags per million) represents the linear normalization of sequence tags to 1 million tags.



Table S10B. Alternatively spliced transcripts from the short stumpy life stage

| Gene ID        | SS TPM             | SS UTR length                  | Description                                                                          |
|----------------|--------------------|--------------------------------|--------------------------------------------------------------------------------------|
| Tb10.26.0750   | 5,1,3              | 16,25,80                       | hypothetical protein, conserved                                                      |
| Tb11.01.1690   | 1,10,5,4           | 1054,110,108,102               | hypothetical protein, conserved                                                      |
| Tb927.6.4080   | 5,1,7,1            | 48,109,114,143                 | hypothetical protein, conserved                                                      |
| Tb11.01.8070   | 1,4,1,1,1,1        | 112,137,140,156,764,1622       | hypothetical protein, conserved                                                      |
| Tb10.70.1580   | 3,3,1              | 32,12,8                        | RNA editing endoribonuclease                                                         |
| Tb927.7.1910   | 23,1,1,16,1,2      | 72,44,-1478,-1648,-1667,-2499  | glycine dehydrogenase, putative                                                      |
| Tb927.4.1130   | 1,1,2,8,1,1,1      | 3,14,16,38,39,62,63            | hypothetical protein, conserved                                                      |
| Tb11.55.0010   | 5,1,1,2            | 81,155,306,307                 | hypothetical protein, conserved                                                      |
| Tb09.211.3000  | 6,7                | 271,268                        | hypothetical protein, conserved                                                      |
| Tb927.7.1550   | 7,1,9,2,1          | 329,323,232,-987,-989          | RNA-editing complex protein; RNA-editing 3%27 terminal uridylyl transferase 2; KRET2 |
| Tb927.8.2670   | 7,1,1,1,2,9        | 2722,2718,2652,221,14,-459     | hypothetical protein, conserved                                                      |
| Tb10.70.5130   | 1,29,37,27,1       | 1822,258,255,32,15             | adenylate kinase, putative                                                           |
| Tb927.2.5930   | 1,1,3,1            | 402,375,315,-55                | hypothetical protein, conserved                                                      |
| Tb927.3.1820   | 1,1                | 376,627                        | hypothetical protein, conserved                                                      |
| Tb927.3.2130   | 1,8,5,3            | -370,-192,-176,-175            | hypothetical protein, conserved                                                      |
| Tb927.8.3090   | 1,1                | 83,55                          | hypothetical protein, conserved                                                      |
| Tb09.160.2060  | 1,1                | 170,146                        | hypothetical protein, conserved                                                      |
| Tb927.8.3130   | 4,4                | 41,21                          | S-adenosyl-methyltransferase mraW-like protein, putative                             |
| Tb10.70.1330   | 5,2,1,1            | 59,46,27,2                     | heat shock protein, putative                                                         |
| Tb927.8.4040   | 2,1,1,1,1          | -92,-80,118,119,145            | endonuclease G, putative                                                             |
| Tb11.02.4600   | 2,2                | 280,289                        | hypothetical protein, conserved                                                      |
| Tb927.8.4150   | 1,3,1,1,2          | 122,257,276,311,352            | hypothetical protein, conserved                                                      |
| Tb927.7.3510   | 1,1                | 9,41                           | hypothetical protein, conserved                                                      |
| Tb10.70.6690   | 42,1,1,2,73,21     | 168,229,279,282,779,784        | hypothetical protein, conserved                                                      |
| Tb927.6.3600   | 1,2,1,1,1          | 71,84,120,136,137              | hypothetical protein, conserved                                                      |
| Tb927.6.4580   | 1,3,2,2,...        | 113,137,1683,3319,...          | hypothetical protein, conserved                                                      |
| Tb927.7.3800   | 1,1                | 29,32                          | hypothetical protein, conserved                                                      |
| Tb927.8.4470   | 1,10,12,1,11,1,3,1 | -53,-40,-35,38,47,49,57,114    | chaperone protein DNAJ, putative                                                     |
| Tb927.3.4420   | 3,5,9,6,1          | 54,62,72,73,76                 | hypothetical protein, conserved                                                      |
| Tb09.211.4880  | 1,2,1,7,1,1        | -416,59,152,185,306,331        | cyclophilin-like protein, putative                                                   |
| Tb927.7.910    | 11,1,14            | 91,268,281                     | hypothetical protein, conserved                                                      |
| Tb927.1.1330   | 7,16,9             | 20,19,16                       | hypothetical protein, conserved                                                      |
| Tb927.7.1370   | 2,1,1,1,2,2        | 3219,2237,1469,1418,1401,6     | spliced leader RNA PSE-promoter transcription factor, putative                       |
| Tb10.6k15.1220 | 1,42,1,2,1,32,7    | 903,334,246,-41,-142,-154,-163 | isoleucyl-tRNA synthetase, putative                                                  |
| Tb10.70.4280   | 9,2,1,4,1,1,1,1    | 950,942,228,79,74,60,52,-705   | delta-1-pyrroline-5-carboxylate dehydrogenase, putative                              |
| Tb927.7.4200   | 1,1,12,1,2,10,1    | 767,105,75,50,4,-235,-238      | hypothetical protein, conserved                                                      |
| Tb927.3.770    | 1,1,1              | 57,484,488                     | hypothetical protein, conserved                                                      |
| Tb10.389.0590  | 3,1,2              | 181,214,234                    | hypothetical protein, conserved                                                      |
| Tb927.6.4540   | 1,1,1,1,2          | 25,50,67,484,522               | 3-hydroxy-3-methylglutaryl-CoA reductase, putative                                   |

|                |                     |                                                 |                                                                                                           |
|----------------|---------------------|-------------------------------------------------|-----------------------------------------------------------------------------------------------------------|
| Tb09.211.2600  | 9,8,1,18,8          | 883,880,868,93,69                               | hypothetical protein, conserved                                                                           |
| Tb10.6k15.1310 | 7,2,2,1,6,1,1       | 26,12,5,-93,-143,-148,-154                      | hypothetical protein, conserved                                                                           |
| Tb927.7.2990   | 2,10,1,1,6          | 869,203,200,165,126                             | hypothetical protein, conserved                                                                           |
| Tb09.211.0330  | 1,1,11,1,16,1       | 574,582,593,595,596,632                         | chaperone protein DNAJ, putative                                                                          |
| Tb927.1.4970   | 11,6,2              | -63,-71,-102                                    | hypothetical protein                                                                                      |
| Tb927.2.4990   | 1,1,1               | -44,-26,10                                      | hypothetical protein, conserved                                                                           |
| Tb927.7.6660   | 1,1                 | 12,339                                          | chaperone protein DNAJ, putative                                                                          |
| Tb927.3.3680   | 1,1                 | 52,49                                           | hypothetical protein, conserved                                                                           |
| Tb09.160.4130  | 10,2,5,1,1          | 188,185,183,159,-652                            | RNA-editing complex protein;<br>KREPB7                                                                    |
| Tb927.6.4070   | 2,64,92,1           | 12,33,34,54                                     | hypothetical protein, conserved                                                                           |
| Tb927.7.560    | 1,1,4,2,9           | -1367,-682,60,96,195                            | hypothetical protein, conserved                                                                           |
| Tb927.5.3640   | 1,11,7,1            | 100,69,-473,-545                                | hypothetical protein, conserved                                                                           |
| Tb09.211.3680  | 6,1,6,1             | 439,111,-61,-64                                 | chaperone protein DNAJ, putative                                                                          |
| Tb11.02.1480   | 2,1,1,12,1,9,1,6,12 | 1186,1159,1148,1117,<br>1108,1093,1075,1001,132 | mitochondrial processing peptidase<br>alpha subunit, putative; metallo-<br>peptidase, Clan ME, Family M16 |
| Tb10.61.0200   | 2,3,1,6             | 138,135,129,86                                  | hypothetical protein, conserved                                                                           |
| Tb927.7.5720   | 7,6                 | 145,106                                         | hypothetical protein, conserved                                                                           |
| Tb11.01.3190   | 1,6,3,1,1,1         | 48,41,36,33,27,-172                             | hypothetical protein, conserved                                                                           |
| Tb927.8.2530   | 1,1,10,21,13,9,1    | 2713,1962,953,936,915,113,10<br>1               | hypothetical protein, conserved                                                                           |
| Tb927.2.4700   | 1,1,1,6,3,2         | 384,438,490,2036,2042,2292                      | hypothetical protein, conserved                                                                           |
| Tb927.7.2560   | 5,8,2,4             | -1281,-51,298,311                               | hypothetical protein, conserved                                                                           |
| Tb11.02.2460   | 1,2,3,3,4,1         | 1533,1507,1506,1502,32,20                       | hypothetical protein, conserved                                                                           |
| Tb11.02.2390   | 4,1,4,1             | 10136,10132,16,3                                | pyruvate dehydrogenase(lipoamide)<br>kinase, putative                                                     |
| Tb10.26.0700   | 1,1,1,1,1,1         | 88672,87554,77586,9780,853,8<br>47              | hypothetical protein                                                                                      |
| Tb927.8.3330   | 54,67               | -37,-43                                         | mitochondrial carrier protein,<br>putative                                                                |
| Tb927.2.2940   | 1,1,2,1,2,1         | 338,44,32,24,-16,-61                            | hypothetical protein, conserved                                                                           |
| Tb927.3.1940   | 58,71,1             | 4,13,1749                                       | hypothetical protein, conserved                                                                           |
| Tb11.01.3300   | 1,4,7               | 55,41,39                                        | hypothetical protein, conserved                                                                           |
| Tb11.02.5530   | 1,4,3               | 162,163,189                                     | electron-transfer-flavoprotein, alpha<br>polypeptide, putative                                            |
| Tb927.8.5130   | 2,1,1               | 618,615,245                                     | hypothetical protein, conserved                                                                           |
| Tb10.70.7840   | 1,24,16             | 224,194,176                                     | choline dehydrogenase, putative                                                                           |
| Tb09.160.0360  | 2,1,1,8,1,1         | 298,481,975,998,1579,1620                       | hypothetical protein, conserved                                                                           |
| Tb11.02.1350   | 2,1,1,2,1           | 292,278,257,234,209                             | hypothetical protein, conserved                                                                           |
| Tb927.8.4960   | 1,2,2,8,1,8,15,8,3  | 2108,610,608,600,562,128,30,1<br>0,-76          | hypothetical protein, conserved                                                                           |
| Tb11.01.6950   | 1,2,1,1,3           | -49,-27,-18,-6,37                               | hypothetical protein, conserved                                                                           |
| Tb927.6.1590   | 9,15,1,8            | -745,-742,141,172                               | hypothetical protein, conserved                                                                           |
| Tb927.8.8360   | 1,1,1,1,5,1,1,4     | 2092,2076,1113,1108,757,729,<br>687,33          | receptor-type adenylate cyclase<br>GRESAG 4, putative                                                     |
| Tb09.160.0550  | 17,1,4,16           | -737,-721,19,23                                 | hypothetical protein, conserved                                                                           |
| Tb11.01.8120   | 1,1,1               | 21,26,246                                       | hypothetical protein, conserved                                                                           |
| Tb10.70.7250   | 4,4                 | 48,37                                           | hypothetical protein, conserved                                                                           |

|                |                                                           |                                                                                   |                                                                                                                               |
|----------------|-----------------------------------------------------------|-----------------------------------------------------------------------------------|-------------------------------------------------------------------------------------------------------------------------------|
| Tb10.6k15.0520 | 34,43                                                     | 34,28                                                                             | hypothetical protein, conserved                                                                                               |
| Tb927.8.6040   | 1,1,1,1,<br>3449,1,1,3448,<br>1,1,3898,1,<br>226,13,1,114 | 1789,1777,1772,1761,<br>1754,1753,1732,1207 ,1151,71<br>6,697,696, 693,690,674,10 | hypothetical protein, conserved                                                                                               |
| Tb10.70.5380   | 1,46,32,2,18,1                                            | 154,115,112,109,-74,-96                                                           | pyruvate dehydrogenase complex E3<br>binding protein, putative                                                                |
| Tb927.4.4620   | 3,7,8                                                     | 20,25,43                                                                          | cytochrome oxidase subunit VIII                                                                                               |
| Tb927.3.4890   | 6,7,1,1,...                                               | 10,889,2109,6636,...                                                              | ubiquinone biosynthesis protein<br>COQ7 homolog, putative                                                                     |
| Tb927.6.4450   | 1,2,1,1,1                                                 | -743,29,66,91,162                                                                 | hypothetical protein, conserved                                                                                               |
| Tb11.12.0014   | 2,21,3,11,1                                               | 430,389,385,12,-388                                                               | hypothetical protein, conserved                                                                                               |
| Tb10.389.0690  | 4,6                                                       | 67,93                                                                             | mitochondrial carrier protein,<br>putative; mitochondrial 2-<br>oxoglutarate/malate carrier protein,<br>putative              |
| Tb11.55.0016   | 1,1,1,1,1                                                 | -1276,82,117,135,138                                                              | hypothetical protein, conserved                                                                                               |
| Tb927.7.2220   | 1,1,1,1,1,1                                               | -801,90,93,95,309,374                                                             | hypothetical protein, conserved                                                                                               |
| Tb927.8.6400   | 4,1,4                                                     | 147,14,-18                                                                        | hypothetical protein, conserved                                                                                               |
| Tb10.70.6350   | 1,1,1,1,16,1,1,1,30                                       | 85,207,270,275,279,338,1161,1<br>519,1521                                         | hypothetical protein, conserved                                                                                               |
| Tb09.v1.0420   | 1,1,4,3,6                                                 | -108,-93,27,60,1568                                                               | hypothetical protein, conserved                                                                                               |
| Tb11.02.3060   | 11,6,5                                                    | 28,-5,-11                                                                         | hypothetical protein, conserved                                                                                               |
| Tb927.8.3070   | 9,7                                                       | 65,45                                                                             | hypothetical protein, conserved                                                                                               |
| Tb09.211.4580  | 1,4,3                                                     | 208,213,242                                                                       | hypothetical protein, conserved                                                                                               |
| Tb10.61.1260   | 14,4,9                                                    | 125,116,110                                                                       | hypothetical protein, conserved                                                                                               |
| Tb927.8.6820   | 4,5,1                                                     | 99,138,1085                                                                       | hypothetical protein, conserved                                                                                               |
| Tb10.6k15.3080 | 1,1,1,1,1,3                                               | -132,-105,-102,-61,31,38                                                          | dihydrolipoamide acetyltransferase<br>E2 subunit, putative                                                                    |
| Tb11.01.5185   | 1,2,2,1                                                   | 2,30,36,109                                                                       | hypothetical protein, conserved                                                                                               |
| Tb927.1.3800   | 6,7,1                                                     | 73,63,52                                                                          | hypothetical protein, conserved                                                                                               |
| Tb927.5.1790   | 1,1,3,2,1,7,1                                             | 513,109,98,81,64,46,37                                                            | hypothetical protein, conserved                                                                                               |
| Tb09.160.1370  | 1,1,1                                                     | 236,245,789                                                                       | hypothetical protein, conserved                                                                                               |
| Tb11.02.3180   | 3,2,1,1,1                                                 | 139,47,40,-468,-1177                                                              | hypothetical protein, conserved                                                                                               |
| Tb11.01.5960   | 2,3,1                                                     | 72,67,13                                                                          | mitochondrial carrier protein,<br>putative                                                                                    |
| Tb10.70.6340   | 4,2,1,1                                                   | 89,124,150,158                                                                    | ATPase subunit 9, putative                                                                                                    |
| Tb927.2.5900   | 4,3,1                                                     | -28,-31,-2082                                                                     | hypothetical protein, conserved                                                                                               |
| Tb10.6k15.0500 | 3,3,1                                                     | 722,182,138                                                                       | hypothetical protein, conserved                                                                                               |
| Tb09.v4.0018   | 1,1                                                       | 85,30                                                                             | expression site-associated gene<br>(ESAG) protein, putative; expression<br>site-associated gene 3(ESAG3)<br>protein, putative |
| Tb11.02.3510   | 1,1                                                       | 113,62                                                                            | hypothetical protein, conserved                                                                                               |
| Tb09.160.1280  | 1,2,1,1,1,2,1,4                                           | -344,-191,-36,9,38,39,45,52                                                       | hypothetical protein, conserved                                                                                               |
| Tb927.2.4740   | 1,1                                                       | 21,48                                                                             | ribosomal protein L11, putative                                                                                               |
| Tb11.02.3470   | 1,2,1                                                     | 240,237,-14                                                                       | formin, putative; formin-like protein                                                                                         |
| Tb927.7.6350   | 1,1,2,8,2,1,4,1                                           | 152,158,308,315,709,725,<br>1357,2006                                             | NADH-ubiquinone oxidoreductase,<br>mitochondrial, putative                                                                    |
| Tb927.7.4440   | 1,1,1                                                     | 270,285,314                                                                       | hypothetical protein, conserved                                                                                               |

|                |                       |                                     |                                                                                    |
|----------------|-----------------------|-------------------------------------|------------------------------------------------------------------------------------|
| Tb11.02.2710   | 11,23,1,4,1           | 202,121,112,-1821,-1827             | hypothetical protein, conserved                                                    |
| Tb927.5.2830   | 1,1,1,1,2             | 67,84,102,104,106                   | hypothetical protein, conserved                                                    |
| Tb927.7.3270   | 4,3,1                 | 24,38,40                            | hypothetical protein, conserved                                                    |
| Tb927.8.3960   | 1,1,1                 | 2,38,41                             | hypothetical protein, conserved                                                    |
| Tb10.61.1300   | 1,1,1,1               | 202,186,184,175                     | hypothetical protein, conserved                                                    |
| Tb927.8.6060   | 26,1,24,41,5          | 191,162,146,132,118                 | 2-amino-3-ketobutyrate coenzyme A ligase, putative                                 |
| Tb927.5.2070   | 1,9,7,4,2,1,1,9,2,22  | 42,43,52,60,66,72,74,80,84,88       | hypothetical protein, conserved                                                    |
| Tb09.211.3470  | 9,6,1,1,1             | 693,688,679,33,8                    | hypothetical protein, conserved                                                    |
| Tb927.4.2560   | 1,1,1                 | 214,211,-1442                       | cardiolipin synthetase, putative                                                   |
| Tb927.8.2240   | 1,3,2                 | 82,79,26                            | tryptophanyl-tRNA synthetase, putative                                             |
| Tb927.7.7330   | 1,1,4,4,2,2,1         | 13,69,74,92,103,108,158             | hypothetical protein, conserved                                                    |
| Tb927.4.2940   | 49,4,1,52,4           | 1413,137,119,55,38                  | hypothetical protein, conserved                                                    |
| Tb11.02.0320   | 1,11,22,44,4          | 84,106,109,111,1051                 | hypothetical protein, conserved                                                    |
| Tb927.6.1840   | 1,49,45,2,3,1,1,4     | 226,245,248,253,254,257,258,259     | hypothetical protein, conserved                                                    |
| Tb09.160.0370  | 4,1,1,1,4             | 80,93,129,130,134                   | hypothetical protein, conserved                                                    |
| Tb927.5.4040   | 6,4,1                 | 68,71,110                           | hypothetical protein, conserved                                                    |
| Tb10.389.0340  | 1,3,3,5,1             | 124,171,175,194,255                 | mitochondrial carrier protein, putative                                            |
| Tb11.01.6080   | 1,2,1,1,2,2,1,1       | 110,54,52,48,-371, -400, -405, -416 | ubiquitin carboxyl-terminal hydrolase, putative                                    |
| Tb927.4.3150   | 4,1,1,1,1,1,1         | 212,191,188,155,149,0,-990          | hypothetical protein, conserved                                                    |
| Tb927.6.4040   | 1,7,7,1               | -16,36,38,87                        | hypothetical protein, conserved                                                    |
| Tb10.70.5830   | 5,1,7                 | 83,79,-146                          | actin-like protein, putative                                                       |
| Tb927.5.2150   | 10,1,1,15,1,1,1,2,... | -1120,-805,9,11,28,151,700,729,...  | hypothetical protein, conserved                                                    |
| Tb927.7.2490   | 1,2,1,7,2             | -1188,56,65,81,479                  | hypothetical protein, conserved                                                    |
| Tb927.4.3300   | 1,1,4,1,1,6,1         | -759,-754,-734,23,47,52,91          | mitochondrial ATP-dependent zinc metallopeptidase, putative                        |
| Tb927.7.3950   | 1,2,7,1,1             | 704,271,217,202,-1121               | RNA-editing complex protein; RNA-editing 3' terminal uridylyl transferase 1; KRET1 |
| Tb10.406.0100  | 1,2,2                 | 13,19,21                            | hypothetical protein, conserved                                                    |
| Tb11.01.4860   | 35,1,2,6,29,1         | 4,12,215,219,225,639                | mitochondrial RNA binding protein 2                                                |
| Tb10.6k15.2490 | 2,2                   | 135,330                             | TFIIF-stimulated CTD phosphatase, putative                                         |
| Tb11.01.4740   | 1,101,23,6,21,32,1,1  | 33,38,46,242,252,260,279,283        | hypothetical protein, conserved                                                    |
| Tb927.8.5560   | 21,1,1,28,1           | 120,6,-22,-150,-159                 | hypothetical protein, conserved                                                    |
| Tb927.6.2490   | 1,1,2                 | 42,-8,-11                           | hypothetical protein, conserved                                                    |
| Tb11.02.2700   | 5,4,1,3               | 164,106,-54,-88                     | fumarate hydratase class I, putative                                               |
| Tb11.02.0290   | 3,1,1,1               | 60,74,76,79                         | succinyl-coA:3-ketoacid-coenzyme A transferase, mitochondrial precursor, putative  |
| Tb09.160.4310  | 26,34,6,1             | 236,154,143,-1512                   | glutamate dehydrogenase                                                            |
| Tb927.4.1540   | 2,18,1,2,9,1,17,1     | -48,168,740,750,765,779,781,1629    | hypothetical protein, conserved                                                    |

|                |                    |                                       |                                                                   |
|----------------|--------------------|---------------------------------------|-------------------------------------------------------------------|
| Tb10.70.5430   | 1,2,1,1,1,1        | 669,228,215,101,59,-82                | hypothetical protein, conserved                                   |
| Tb927.8.3830   | 1,2,2,1            | 100,118,208,212                       | ATP-dependent DEAD%2FH RNA helicase, putative                     |
| Tb10.389.0020  | 1,1,1,1            | 212,261,395,417                       | phosphatidic acid phosphatase alpha, putative                     |
| Tb927.4.830    | 1,10,11            | -201,-181,-176                        | hypothetical protein, conserved                                   |
| Tb11.02.2280   | 12,17,11           | 263,202,196                           | hypothetical protein, conserved                                   |
| Tb11.02.5390   | 1,10,5,5           | 56,28,-11,-898                        | hypothetical protein, conserved                                   |
| Tb10.61.2990   | 1,5,46,41          | 17,22,45,1002                         | hypothetical protein, conserved                                   |
| Tb927.2.4110   | 1,2,1,1,1          | 160,224,315,526,533                   | mitochondrial processing peptidase alpha subunit, putative        |
| Tb927.3.1790   | 6,4,11             | 121,128,130                           | pyruvate dehydrogenase E1 beta subunit, putative                  |
| Tb09.211.0510  | 1,2,1,1            | 43,51,78,110                          | cytochrome c oxidase assembly factor, putative                    |
| Tb11.01.0150   | 6,2,2,1,1,8        | 481,429,425,421,389,-982              | hypothetical protein, conserved                                   |
| Tb11.01.0880   | 2,1,24,13,1        | 190,187,74,30,-383                    | hypothetical protein, conserved                                   |
| Tb927.4.2250   | 1,1,1,1            | 272,232,166,162                       | hypothetical protein, conserved                                   |
| Tb11.01.7480   | 4,6,6,1            | 113,116,121,139                       | superoxide dismutase, putative                                    |
| Tb927.3.4210   | 1,1,1              | -4311,-113,-52                        | hypothetical protein, conserved                                   |
| Tb11.02.5290   | 1,4,1,1,1          | 711,111,38,34,7                       | hypothetical protein, conserved                                   |
| Tb10.6k15.2510 | 3,11,7             | 15,18,21                              | hypothetical protein, conserved                                   |
| Tb11.01.0890   | 1,1,13,14,1,34,1,1 | 145,136,-142,-176,-199,-203,-210,-215 | hypothetical protein, conserved                                   |
| Tb927.8.7290   | 2,2,1,2            | 109,106,102,36                        | hypothetical protein, conserved                                   |
| Tb927.7.3750   | 1,1,2,6,2          | 30,344,417,425,475                    | TFIIF-stimulated CTD phosphatase, putative                        |
| Tb927.8.3160   | 4,4                | 702,683                               | hypothetical protein, conserved                                   |
| Tb10.70.4120   | 1,6,1,4,1          | 127,6,-642,-675,-680                  | hypothetical protein, conserved                                   |
| Tb09.211.3080  | 1,3,2              | 84,81,0                               | hypothetical protein, conserved                                   |
| Tb11.01.2360   | 8,7                | 156,134                               | hypothetical protein, conserved                                   |
| Tb927.6.4400   | 1,2,1,1,3          | -67,29,38,91,162                      | hypothetical protein, conserved                                   |
| Tb09.244.2860  | ...,4,10,1,175,1   | ...,3810,1982,1979,41,35              | hypothetical protein, conserved                                   |
| Tb927.5.680    | 64,1,85,1,1        | 41,10,-996,-1002,-1006                | hypothetical protein, conserved                                   |
| Tb927.8.2190   | 5,3,1,1            | 567,27,6,-6                           | hypothetical protein, conserved                                   |
| Tb927.5.450    | 2,18,19            | 608,708,714                           | NADH-ubiquinone oxidoreductase, mitochondrial, putative           |
| Tb927.8.1860   | 1,1,9,7,1          | 84,92,94,98,106                       | pitrilysin-like metalloprotease                                   |
| Tb927.7.3990   | 1,3,1,2,1          | 1133,1128,1123,471,42                 | mitochondrial DNA polymerase I protein C                          |
| Tb11.01.6580   | 1,2,1,1            | -267,131,158,878                      | hypothetical protein, conserved                                   |
| Tb927.8.5280   | 1,1,51,44,1        | 58,55,42,37,14                        | hypothetical protein, conserved                                   |
| Tb10.100.0220  | 5,7,1              | 16,11,5                               | mitochondrial structure specific endonuclease I (SSE-1), putative |
| Tb11.02.0130   | 21,42,7,1,1        | -1288,396,427,450,455                 | hypothetical protein, conserved                                   |
| Tb10.70.0660   | 14,3,19,1,1,1,1    | -3546,94,107,124,135,162,722          | hypothetical protein, conserved                                   |
| Tb11.01.1040   | 26,12,2,1,14       | 166,90,75,-1251,-1254                 | hypothetical protein, conserved                                   |
| Tb927.3.4140   | 9,10,1             | 16,18,583                             | hypothetical protein, conserved                                   |

Table S10C. Alternatively spliced transcripts from the procyclic life stage.

| Gene ID       | PC TPM            | PC UTR length                            | Description                                                                            |
|---------------|-------------------|------------------------------------------|----------------------------------------------------------------------------------------|
| Tb10.26.0750  | 2,2,2,2           | 1,12,16,25                               | hypothetical protein, conserved                                                        |
| Tb11.01.1690  | 1,1,15,3,7        | 1054,187,110,108,102                     | hypothetical protein, conserved                                                        |
| Tb927.6.4080  | 4,2,4,1,2,1       | 48,109,114,143,254,265                   | hypothetical protein, conserved                                                        |
| Tb11.01.8070  | 1,5,2,1,2,3,1     | -220,137,140,716,746,764,1447            | hypothetical protein, conserved                                                        |
| Tb927.7.1910  | 11,9,2            | 72,44,-1648                              | glycine dehydrogenase, putative                                                        |
| Tb10.389.1880 | 5,3,2             | 110,32,2                                 | hypothetical protein, conserved                                                        |
| Tb927.8.2170  | 11,9,2            | 71,22,0                                  | hypothetical protein, conserved                                                        |
| Tb927.4.1130  | 1,2,3             | -8,3,16                                  | hypothetical protein, conserved                                                        |
| Tb09.211.3000 | 50,40             | 271,268                                  | hypothetical protein, conserved                                                        |
| Tb927.8.2670  | 1,12,2,3,1,3,22,1 | 2790,2722,2714,1743,<br>1352,221,14,-459 | hypothetical protein, conserved                                                        |
| Tb10.70.5130  | 3,1,15,20,6       | 768,544,258,255,32                       | adenylate kinase, putative                                                             |
| Tb927.7.2700  | 38,41             | 13,42                                    | NADH-cytochrome b5 reductase,<br>putative                                              |
| Tb09.160.2060 | 5,4               | 170,146                                  | hypothetical protein, conserved                                                        |
| Tb927.8.3130  | 2,1,1,1           | 41,21,15,-6                              | S-adenosyl-methyltransferase mraW-like<br>protein, putative                            |
| Tb11.02.4600  | 1,2,1             | 224,280,289                              | hypothetical protein, conserved                                                        |
| Tb927.8.4150  | 9,9               | 276,352                                  | hypothetical protein, conserved                                                        |
| Tb927.6.2510  | 1,1               | 119,15                                   | hypothetical protein, conserved                                                        |
| Tb11.02.5670  | 2,5,9             | 50,193,242                               | hypothetical protein, conserved                                                        |
| Tb927.1.730   | 7,1,2,2,1         | 15,616,642,643,644                       | hypothetical protein, conserved                                                        |
| Tb10.389.1910 | 5,4,7,1           | 194,167,151,102                          | hypothetical protein, conserved                                                        |
| Tb10.70.6690  | 6,1,1,6,3         | 168,279,282,779,784                      | hypothetical protein, conserved                                                        |
| Tb10.26.0600  | 1,5,6,2           | 1144,534,79,66                           | hypothetical protein, conserved                                                        |
| Tb927.7.3800  | 2,2               | 29,32                                    | hypothetical protein, conserved                                                        |
| Tb927.8.4470  | 4,9,1,2,1         | -40,-35,38,47,57                         | chaperone protein DNAJ, putative                                                       |
| Tb927.3.4420  | 3,5,3,1           | 23,62,72,73                              | hypothetical protein, conserved                                                        |
| Tb09.211.4880 | 2,6,2,1           | 51,152,185,331                           | cyclophilin-like protein, putative                                                     |
| Tb10.70.2900  | 1,2,4,1           | 681,64,24,17                             | 2-oxoisovalerate dehydrogenase beta<br>subunit, mitochondrial precursor,<br>putative   |
| Tb927.1.1210  | 2,3,1             | 798,194,-43                              | hypothetical protein, conserved                                                        |
| Tb927.1.1330  | 11,15,11,1        | 20,19,16,0                               | hypothetical protein, conserved                                                        |
| Tb10.v4.0043  | 3,3               | 24,64                                    | branched-chain alpha-keto acid<br>dehydrogenase e1-beta subunit precursor,<br>putative |
| Tb927.3.770   | 2,2,1,2           | 54,57,72,488                             | hypothetical protein, conserved                                                        |
| Tb10.389.0590 | 1,1,3,1           | 87,94,181,204                            | hypothetical protein, conserved                                                        |
| Tb927.6.3740  | 1,8,3,5           | 27,37,43,58                              | heat shock 70 kDa protein, mitochondrial<br>precursor, putative                        |
| Tb927.6.4540  | 1,1,9,1,1,1,1,3,1 | 2,8,33,48,50,52,486,489,522              | 3-hydroxy-3-methylglutaryl-CoA<br>reductase, putative                                  |
| Tb09.211.2600 | 20,10,21,3,1      | 883,880,93,69,38                         | hypothetical protein, conserved                                                        |
| Tb927.5.2810  | 1,1,2             | 47,132,1004                              | hypothetical protein, conserved                                                        |
| Tb927.3.950   | 6,12,1,2          | 2144,258,249,-38                         | hypothetical protein, conserved                                                        |
| Tb927.8.1420  | 8,1,1,5,2,1       | 196,181,96,88,80,-1460                   | acyl-CoA dehydrogenase, mitochondrial<br>precursor, putative                           |

|                |                                    |                                                   |                                                                                         |
|----------------|------------------------------------|---------------------------------------------------|-----------------------------------------------------------------------------------------|
| Tb927.7.2990   | 1,3,8,17,3,2                       | 1124,873,869,203,200,126                          | hypothetical protein, conserved                                                         |
| Tb09.211.0330  | 2,9,46,29                          | 574,582,593,596                                   | chaperone protein DNAJ, putative                                                        |
| Tb927.8.1700   | 2,4,14,2,22                        | -201,-198,-196,-38,114                            | hypothetical protein, conserved                                                         |
| Tb11.01.6320   | 16,15,43                           | 65,626,629                                        | hypothetical protein, conserved                                                         |
| Tb11.01.8230   | 1,1,1,1,1                          | -1109,8,198,217,284                               | hypothetical protein, conserved                                                         |
| Tb09.160.3370  | 8,11,1,1                           | 366,361,342,19                                    | hypothetical protein, conserved                                                         |
| Tb927.6.4070   | 4,25,26                            | 12,33,34                                          | hypothetical protein, conserved                                                         |
| Tb927.4.2550   | 4,2,2,1,1,2,3,1,29,37,4            | 482,364,343,317,296,284,264,259,235,224,221       | hypothetical protein, conserved                                                         |
| Tb927.1.3010   | 2,7,9,9                            | 127,63,39,22                                      | hypothetical protein, conserved                                                         |
| Tb10.6k15.0490 | 1,4,23,5,6                         | 98,97,80,77,65                                    | mitochondrial intermediate peptidase, putative; metallo-peptidase, Clan MA(E) Family M3 |
| Tb11.02.0355   | 1,5,8,2,1,1                        | -195,339,364,392,393,404                          | hypothetical protein, conserved                                                         |
| Tb11.01.6710   | 1,1,1,1                            | -8,-5,36,37                                       | hypothetical protein, conserved                                                         |
| Tb927.6.680    | 2,2,1                              | 191,246,4946                                      | hypothetical protein, conserved                                                         |
| Tb927.5.3140   | 3,2,3                              | 121,208,289                                       | hypothetical protein, conserved                                                         |
| Tb927.8.2530   | 1,65,58,3,9,1                      | 1400,953,936,915,113,101                          | hypothetical protein, conserved                                                         |
| Tb927.2.4700   | 1,3,1,1,3,2,1                      | 429,438,529,885,2036,2042,2292                    | hypothetical protein, conserved                                                         |
| Tb927.7.2560   | 5,5                                | 298,311                                           | hypothetical protein, conserved                                                         |
| Tb11.01.7900   | 1,1,1                              | 26,42,73                                          | hypothetical protein, conserved                                                         |
| Tb11.02.2460   | 6,10,8,2,20,1                      | 1507,1506,1502,1490,32,20                         | hypothetical protein, conserved                                                         |
| Tb10.26.0700   | 1,1,1,2                            | 86605,77676,853,847                               | hypothetical protein                                                                    |
| Tb11.01.3200   | 17,6,22                            | 751,584,101                                       | hypothetical protein, conserved                                                         |
| Tb927.8.3330   | 10,16,1                            | -37,-43,-50                                       | mitochondrial carrier protein, putative                                                 |
| Tb927.7.5550   | 7,1,1,2,5,4,5,4                    | 314,295,278,265,0,-58,-61,-101                    | hypothetical protein, conserved                                                         |
| Tb09.160.4750  | 3,1,12,6,9,1                       | 89,85,66,52,-7,-23                                | hypothetical protein, conserved                                                         |
| Tb11.02.3810   | 1,3,40,32                          | 384,403,413,425                                   | hypothetical protein, conserved                                                         |
| Tb10.70.2090   | 14,12,1                            | 241,238,210                                       | RNA-editing complex protein; KREPA6                                                     |
| Tb10.v4.0053   | 6,4                                | 125,146                                           | hypothetical protein                                                                    |
| Tb927.3.820    | 1,1,1,3                            | 42,49,75,81                                       | hypothetical protein, conserved                                                         |
| Tb11.02.1350   | 2,1,1,4,3                          | 292,268,263,234,215                               | hypothetical protein, conserved                                                         |
| Tb927.7.800    | 19,20                              | 27,42                                             | hypothetical protein, conserved                                                         |
| Tb927.8.8170   | 1,26,1,28,1,7,44                   | 1230,1229,1210,1034,1029,168,53                   | hypothetical protein, conserved                                                         |
| Tb927.8.4960   | 20,9,12,1,1,3,1,1,3,11,3           | 610,608,600,562,146,128,62,49,30,10,-76           | hypothetical protein, conserved                                                         |
| Tb927.8.1060   | 3,3                                | 171,203                                           | malonyl-CoA decarboxylase, mitochondrial precursor, putative                            |
| Tb927.8.6040   | 2,3,1,2073,1,1,2072,4883,107,12,37 | 1794,1789,1784,1754,1752,1209,1207,697,693,690,10 | hypothetical protein, conserved                                                         |
| Tb927.6.4450   | 3,1,1,2                            | 29,84,91,162                                      | hypothetical protein, conserved                                                         |
| Tb11.01.8710   | 1,1                                | 981,985                                           | hypothetical protein, conserved                                                         |
| Tb11.12.0014   | 19,1,1,20,1                        | 389,385,370,12,-125                               | hypothetical protein, conserved                                                         |
| Tb10.70.5960   | 9,29,11                            | 77,71,60                                          | hypothetical protein, conserved                                                         |
| Tb11.55.0016   | 2,1,3                              | 82,112,117                                        | hypothetical protein, conserved                                                         |
| Tb927.7.2220   | 1,1,1,3,3                          | 90,95,309,365,707                                 | hypothetical protein, conserved                                                         |

|               |                     |                               |                                                                                                                       |
|---------------|---------------------|-------------------------------|-----------------------------------------------------------------------------------------------------------------------|
| Tb11.01.0500  | 137,3,139           | 772,767,45                    | hypothetical protein, conserved                                                                                       |
| Tb09.211.4580 | 1,1,3,4,2           | 172,208,213,242,247           | hypothetical protein, conserved                                                                                       |
| Tb10.61.1260  | 59,32,42            | 125,116,110                   | hypothetical protein, conserved                                                                                       |
| Tb10.389.0900 | 1,7,11,1            | 31,43,158,716                 | hypothetical protein, conserved                                                                                       |
| Tb927.2.4130  | 1,1,3,5,13          | -316,-311,22,75,83            | enoyl-CoA hydratase/Enoyl-CoA isomerase/3-hydroxyacyl-CoA dehydrogenase, putative                                     |
| Tb927.5.1790  | 1,2,3,1,7           | 482,98,81,64,46               | hypothetical protein, conserved                                                                                       |
| Tb09.v4.0018  | 2,2                 | 85,41                         | expression site-associated gene (ESAG) protein, putative; expression site-associated gene 3 (ESAG3) protein, putative |
| Tb09.160.1280 | 2,3,1,3,3           | -12,-9,0,9,52                 | hypothetical protein, conserved                                                                                       |
| Tb927.7.2620  | 1,1                 | 151,182                       | hypothetical protein, conserved                                                                                       |
| Tb11.02.3470  | 1,1,1               | 252,240,237                   | formin, putative; formin-like protein                                                                                 |
| Tb927.5.2780  | 1,1,1,7,5           | 52,86,125,128,409             | mitochondrial DNA polymerase beta                                                                                     |
| Tb927.8.620   | 2,4,1,42,1,37       | 95,102,113,122,129,150        | RNA-editing complex protein MP42                                                                                      |
| Tb11.02.2710  | 13,9                | 202,121                       | hypothetical protein, conserved                                                                                       |
| Tb10.61.1300  | 4,1,2,1             | 202,188,186,175               | hypothetical protein, conserved                                                                                       |
| Tb11.55.0009  | 1,140,21,185,36,1   | 2,7,148,151,159,515           | mitochondrial RNA binding protein 1; gBP21, MRP1                                                                      |
| Tb927.5.2070  | 1,2,9,3,8,8,1,6     | 9,42,43,52,60,80,84,88        | hypothetical protein, conserved                                                                                       |
| Tb927.2.4830  | 1,2,1               | 65,73,96                      | TFIIF-stimulated CTD phosphatase, putative                                                                            |
| Tb927.7.7440  | 3,8,2,13            | 175,205,1832,1836             | hypothetical protein, conserved                                                                                       |
| Tb927.4.2940  | 7,3,14,1,2          | 1413,137,55,25,13             | hypothetical protein, conserved                                                                                       |
| Tb09.160.2220 | 3,15,1,3,7,1,1,1    | 52,35,34,27,24,19,-47,-79     | hypothetical protein, conserved                                                                                       |
| Tb11.47.0020  | 1,7,2,11,3          | 726,724,719,64,62             | hypothetical protein, conserved                                                                                       |
| Tb11.02.0320  | 2,11,15,9,16        | 84,106,109,111,151            | hypothetical protein, conserved                                                                                       |
| Tb927.6.1840  | 5,32,22,1,2,3       | 226,245,248,253,254,259       | hypothetical protein, conserved                                                                                       |
| Tb09.160.0370 | 15,10,1,1,7         | 80,93,129,130,134             | hypothetical protein, conserved                                                                                       |
| Tb927.5.4040  | 14,9,1              | 68,71,107                     | hypothetical protein, conserved                                                                                       |
| Tb09.160.0760 | 6,1,3               | 0,70,82                       | hypothetical protein, conserved                                                                                       |
| Tb11.01.6080  | 1,1,1,1             | 110,54,48,17                  | ubiquitin carboxyl-terminal hydrolase, putative                                                                       |
| Tb927.2.2400  | 2,2                 | 65,144                        | hypothetical protein, conserved                                                                                       |
| Tb927.5.2150  | 1,15,1,1,3,...      | -1120,11,21,151,729,...       | hypothetical protein, conserved                                                                                       |
| Tb10.406.0100 | 1,3,2               | 19,21,29                      | hypothetical protein, conserved                                                                                       |
| Tb927.5.2100  | 1,1,1,15,1,21,1     | -157,69,94,96,100,101,118     | hypothetical protein, conserved                                                                                       |
| Tb11.01.4740  | 1,18,3,3,126,78,2,1 | -94,38,46,242,252,260,275,279 | hypothetical protein, conserved                                                                                       |
| Tb10.70.5780  | 1,1,1               | 55,51,15                      | hypothetical protein, conserved                                                                                       |
| Tb927.6.2490  | 1,9,23,8            | 42,-8,-11,-33                 | hypothetical protein, conserved                                                                                       |
| Tb11.02.2700  | 3,8,1,3             | 164,106,47,-88                | fumarate hydratase class I, putative                                                                                  |
| Tb11.02.0290  | 3,7,6               | 74,76,79                      | succinyl-coA:3-ketoacid-coenzyme A transferase, mitochondrial precursor, putative                                     |
| Tb10.70.4380  | 6,6                 | 80,46                         | cytochrome C oxidase assembly protein, putative                                                                       |
| Tb927.4.1540  | 14,1,1,1,32,3,38    | 168,566,590,750,765,779,781   | hypothetical protein, conserved                                                                                       |
| Tb927.8.3830  | 3,2,5,6             | 111,118,208,212               | ATP-dependent DEAD/H RNA helicase,                                                                                    |



|               |                          |                                            |                                                                  |
|---------------|--------------------------|--------------------------------------------|------------------------------------------------------------------|
|               |                          |                                            | putative                                                         |
| Tb10.389.0020 | 3,3                      | 261,322                                    | phosphatidic acid phosphatase alpha, putative                    |
| Tb927.7.7230  | 1,5,3,1                  | 65,69,461,465                              | nitroreductase, putative                                         |
| Tb11.02.2280  | 20,46,14                 | 263,202,196                                | hypothetical protein, conserved                                  |
| Tb927.3.1410  | 37,19,7,3                | 941,116,94,79                              | cytochrome oxidase subunit VII                                   |
| Tb11.01.7340  | 2,6,10                   | 146,152,155                                | hypothetical protein, conserved                                  |
| Tb927.7.3970  | 1,30,3,23                | 498,493,475,457                            | hypothetical protein, conserved                                  |
| Tb11.01.0150  | 2,2,2,1,1                | 429,425,421,389,238                        | hypothetical protein, conserved                                  |
| Tb11.01.6180  | 1,1,1                    | 95,60,-194                                 | hypothetical protein, conserved                                  |
| Tb927.2.3420  | 3,6,2,1                  | 178,389,391,497                            | hypothetical protein, conserved                                  |
| Tb927.8.7260  | 22,3,2,2,1,50,6,5,1,30,1 | 1850,1845,1335,982,981,958,913,54,47,6,-87 | kinetoplast-associated protein, putative                         |
| Tb927.4.2250  | 1,3,3,1                  | 272,186,175,166                            | hypothetical protein, conserved                                  |
| Tb11.01.0710  | 5,5,1                    | -5,-15,-28                                 | elongation factor G2-like protein                                |
| Tb11.01.4702  | 1,1,10,38,1,11,20        | 1,8,30,35,1738,1744,3777                   | cytochrome oxidase subunit X                                     |
| Tb10.389.0890 | 3,5,5                    | 168,184,210                                | pyruvate dehydrogenase E1 alpha subunit, putative                |
| Tb09.160.0890 | 1,10,15,4                | -242,-238,-208,-136                        | hypothetical protein, conserved                                  |
| Tb927.8.7290  | 1,11,7,1                 | 131,109,106,36                             | hypothetical protein, conserved                                  |
| Tb11.02.4800  | 4,13,13                  | -65,-59,47                                 | NADH-cytochrome b5 reductase-like protein                        |
| Tb927.7.3470  | 1,1,1,3                  | 15,67,795,1078                             | p22 protein precursor, putative                                  |
| Tb11.01.2920  | 5,5                      | 32,4                                       | hypothetical protein, conserved                                  |
| Tb927.2.3800  | 2,1,1,1,4                | 9,600,603,629,4817                         | hypothetical protein, conserved                                  |
| Tb927.6.4400  | 4,1,1,2,1                | 29,66,67,91,162                            | hypothetical protein, conserved                                  |
| Tb09.244.2860 | ...,14,1,120,3,1         | ...,3810,1982,1979,41,39,35                | hypothetical protein, conserved                                  |
| Tb927.2.5140  | 6,5,1                    | 24,14,5                                    | hypothetical protein, conserved                                  |
| Tb927.8.2760  | 2,2                      | 49,45                                      | hypothetical protein, conserved                                  |
| Tb927.8.2190  | 3,1,16,3,6               | 567,32,27,9,6                              | hypothetical protein, conserved                                  |
| Tb927.3.4700  | 1,9,4,2,3,2,1            | 31,36,54,81,106,107,2093                   | hypothetical protein, conserved                                  |
| Tb11.02.3230  | 3,2,1                    | 239,222,174                                | hypothetical protein, conserved                                  |
| Tb09.211.1610 | 1,1,2                    | 79,87,125                                  | phosphatidylserine decarboxylase, putative                       |
| Tb11.01.2340  | 10,1,11                  | 196,195,166                                | hypothetical protein, conserved                                  |
| Tb927.8.680   | 2,1,8,9                  | -150,-20,49,714                            | RNA-editing complex protein                                      |
| Tb927.7.3990  | 2,3,4                    | 1133,1128,471                              | mitochondrial DNA polymerase I protein C                         |
| Tb11.01.6580  | 2,1,3                    | 131,134,158                                | hypothetical protein, conserved                                  |
| Tb927.8.5280  | 1,26,1,21,1,2            | 55,42,39,37,5,0                            | hypothetical protein, conserved                                  |
| Tb10.100.0220 | 4,4,1                    | 16,11,5                                    | mitochondrial structure specific endonuclease I(SSE-1), putative |
| Tb10.70.0660  | 4,8,3                    | -3546,94,107                               | hypothetical protein, conserved                                  |
| Tb11.01.1040  | 3,9,3,3                  | 166,90,75,69                               | hypothetical protein, conserved                                  |
| Tb927.3.4140  | 2,3,2                    | 16,18,583                                  | hypothetical protein, conserved                                  |

Table S11. Alternative splice variants that potentially change N-terminus of the corresponding protein and the corresponding localization signal (M, mitochondrial; S, secretory)

|                | <b>Canonical</b> |             | <b>Alternative</b> |             |
|----------------|------------------|-------------|--------------------|-------------|
| <b>Gene ID</b> | <b>Size (aa)</b> | <b>Loc.</b> | <b>Size (aa)</b>   | <b>Loc.</b> |
| Tb927.2.4130   | 803              | M           | 367                | -           |
|                |                  |             | 350                |             |
| Tb927.4.3300   | 719              | M           | 393                | -           |
|                |                  |             | 324                |             |
|                |                  |             | 314                |             |
| Tb927.5.1790   | 631              | M           | 549                | -           |
| Tb927.5.2150   | 529              | -           | 398                | M           |
| Tb927.5.3640   | 270              | M           | 229                | -           |
|                |                  |             | 188                |             |
| Tb927.5.680    | 585              | M           | 517                | -           |
|                |                  |             | 417                |             |
|                |                  |             | 363                |             |
| Tb927.6.4450   | 603              | M           | 384                | -           |
|                |                  |             | 368                | S           |
| Tb927.7.1910   | 970              | M           | 828                | -           |
|                |                  |             | 776                |             |
|                |                  |             | 746                |             |
|                |                  |             | 711                |             |
| Tb927.7.2220   | 669              | M           | 419                | -           |
| Tb927.7.2490   | 703              | M           | 561                | S           |
| Tb927.7.2560   | 1205             | M           | 971                | S           |
|                |                  |             | 817                | S           |
|                |                  |             | 762                | -           |
| Tb927.7.3990   | 1649             | M           | 803                | -           |
| Tb927.7.560    | 773              | M           | 684                | -           |
|                |                  |             | 455                |             |
| Tb927.8.2670   | 428              | M           | 295                | S           |
|                |                  |             | 244                | -           |
|                |                  |             | 190                | -           |
| Tb927.8.2880   | 1131             | M           | 640                | -           |
| Tb09.160.4130  | 411              | M           | 332                | -           |
| Tb09.160.4310  | 992              | M           | 807                | -           |
|                |                  |             | 775                |             |
| Tb09.211.4880  | 384              | M           | 243                | -           |
|                |                  |             | 236                |             |
| Tb10.70.0660   | 1508             | M           | 1469               | -           |
|                |                  |             | 646                |             |
|                |                  |             | 637                |             |
| Tb10.70.4120   | 556              | -           | 371                | M           |
| Tb10.70.4280   | 561              | M           | 348                | -           |
| Tb10.70.5430   | 192              | M           | 87                 | -           |
| Tb10.70.5510   | 600              | M           | 417                | -           |
| Tb11.01.1040   | 668              | M           | 613                | -           |
|                |                  |             | 585                |             |

|               |      |   |            |   |
|---------------|------|---|------------|---|
|               |      |   | 523        |   |
|               |      |   | 434        |   |
|               |      |   | 420        |   |
| Tb11.01.1660  | 553  | M | 466        | - |
| Tb11.01.6080  | 442  | M | 269        | - |
| Tb11.01.8230  | 1068 | M | 712        | - |
| Tb11.02.0130  | 747  | M | 654        | - |
| Tb11.02.0355  | 271  | M | 133        | - |
| Tb11.02.0430  | 383  | M | 166        | - |
| Tb11.02.5820  | 527  | M | 441        | - |
| Tb11.12.0014  | 277  | M | 124        | - |
| Tb11.55.0016  | 831  | M | 698        | - |
| Tb09.160.0360 | 204  | M | <b>337</b> | - |
| Tb10.26.0860  | 243  | - | <b>337</b> | M |
| Tb11.02.3810  | 351  | - | <b>459</b> | M |
| Tb927.4.4910  | 400  | M | <b>470</b> | S |
| Tb927.7.7090  | 152  | M | <b>308</b> | S |
| Tb927.7.7090  | 152  |   | <b>312</b> |   |
